# Supplementary material for: Copper-catalyzed C5-selective thio/selenocyanation of 8-aminoquinolines
Source: Royal Society of Chemistry journal article supplement (doi:10.1039/c6qo00590j), 2016-10-26

# Supporting Information

## Copper-catalyzed C5-selective thio/selenocyanation of 8-aminoquinolines

Jichao Chen,<sup>a</sup> Tianyu Wang,<sup>a</sup> Tong Wang,<sup>\*ab</sup> Aijun Lin,<sup>a</sup> Hequan Yao<sup>a</sup> and Jinyi Xu,<sup>\*a</sup>

<sup>a</sup> State Key Laboratory of Natural Medicines and Department of Medicinal Chemistry, China Pharmaceutical University, 24 Tong Jia Xiang, Nanjing 210009, P. R. China.  
E-mail: jinyixu@china.com.

<sup>b</sup> Beijing National Laboratory for Molecular Sciences, CAS Key Laboratory of Molecular Recognition and Function, Institute of Chemistry, Chinese Academy of Sciences, Beijing 100190, P. R. China.  
E-mail: wangtong@iccas.ac.cn.

### Contents

|                                                                                       |    |
|---------------------------------------------------------------------------------------|----|
| Materials and Methods .....                                                           | 2  |
| Preparation of Substrates.....                                                        | 2  |
| Table S1 Optimization of Reaction Conditions .....                                    | 2  |
| General Procedure for thio/selenocyanation of Quinolines .....                        | 3  |
| Analytical Data for the Products .....                                                | 3  |
| Synthetic Applications of 3a .....                                                    | 12 |
| References .....                                                                      | 13 |
| Single-crystal X-ray data for compound 3a .....                                       | 14 |
| Copies of <sup>1</sup> H and <sup>13</sup> C NMR Spectra for the title compounds..... | 15 |

# Materials and Methods

## 1. General

All reactions were carried out in oven-dried glassware. Melting points (m.p.) were taken on an XT-4 micro melting point apparatus and uncorrected. IR spectra were recorded in KBr on a Nicolet Impact 410 grating infrared spectrophotometer ( $\nu_{\max}$  in  $\text{cm}^{-1}$ ).  $^1\text{H}$  NMR and  $^{13}\text{C}$  NMR spectra were recorded on Bruker-300 spectrometers, and were referenced to the residual peaks of  $\text{CDCl}_3$  at 7.26 ppm or  $\text{DMSO}-d_6$  at 2.50 ppm ( $^1\text{H}$  NMR) and  $\text{CDCl}_3$  at 77.0 ppm or  $\text{DMSO}-d_6$  at 39.5 ppm ( $^{13}\text{C}$  NMR). Data are reported as follows: chemical shift in ppm ( $\delta$ ), multiplicity (s = singlet, d = doublet, t = triplet, q = quartet, brs = broad singlet, m = multiplet), coupling constant (Hz), and integration. High Resolution Mass measurement was performed on Agilent QTOF 6520 mass spectrometer with electron spray ionization (ESI) as the ion source. Flash column chromatography was carried out using commercially available 200-300 mesh under pressure.

## 2. Materials

Unless otherwise indicated, all reagents were obtained from commercial suppliers used without further purification. PE refers to petroleum ether (b.p. 60-90 °C) and EA refers to ethyl acetate, and all reaction solvents were freshly distilled prior to use.

## Preparation of Substrates

All substrates were synthesized according to the literature procedures and the  $^1\text{H}$  NMR spectrum data for them showed good agreement with the literature data.<sup>1</sup>

**Table S1 Optimization of Reaction Conditions<sup>a</sup>**

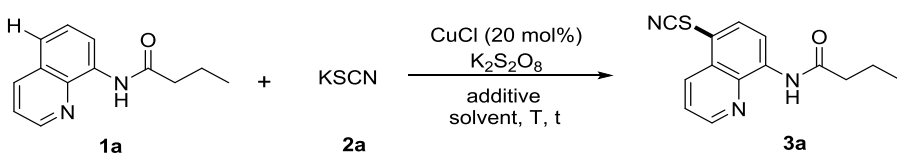

| Entry | $\text{K}_2\text{S}_2\text{O}_8$ (equiv.) | Solvent         | Additive (mol%) | T (°C) | t (h) | Yield <sup>b</sup> (%) |
|-------|-------------------------------------------|-----------------|-----------------|--------|-------|------------------------|
| 1     | $\text{K}_2\text{S}_2\text{O}_8$ (1.0)    | DCE             | /               | 120    | 24    | 36                     |
| 2     | $\text{K}_2\text{S}_2\text{O}_8$ (1.5)    | DCE             | /               | 120    | 24    | 54                     |
| 3     | $\text{K}_2\text{S}_2\text{O}_8$ (2.0)    | DCE             | /               | 120    | 24    | 65                     |
| 4     | $\text{K}_2\text{S}_2\text{O}_8$ (3.0)    | DCE             | /               | 120    | 24    | 64                     |
| 5     | $\text{K}_2\text{S}_2\text{O}_8$ (2.0)    | $\text{CHCl}_3$ | /               | 120    | 24    | 58                     |
| 6     | $\text{K}_2\text{S}_2\text{O}_8$ (2.0)    | THF             | /               | 120    | 24    | 0                      |

|    |                                                    |                    |           |     |    |           |
|----|----------------------------------------------------|--------------------|-----------|-----|----|-----------|
| 7  | K <sub>2</sub> S <sub>2</sub> O <sub>8</sub> (2.0) | CH <sub>3</sub> CN | /         | 120 | 24 | 0         |
| 8  | K <sub>2</sub> S <sub>2</sub> O <sub>8</sub> (2.0) | dioxane            | /         | 120 | 24 | 0         |
| 9  | K <sub>2</sub> S <sub>2</sub> O <sub>8</sub> (2.0) | toluene            | /         | 120 | 24 | trace     |
| 10 | K <sub>2</sub> S <sub>2</sub> O <sub>8</sub> (2.0) | chlorobenzene      | /         | 120 | 24 | trace     |
| 11 | K <sub>2</sub> S <sub>2</sub> O <sub>8</sub> (2.0) | DMF                | /         | 120 | 24 | 0         |
| 12 | K <sub>2</sub> S <sub>2</sub> O <sub>8</sub> (2.0) | DMSO               | /         | 120 | 24 | 0         |
| 13 | K <sub>2</sub> S <sub>2</sub> O <sub>8</sub> (2.0) | DCE                | TBAI (5)  | 120 | 24 | 61        |
| 14 | K <sub>2</sub> S <sub>2</sub> O <sub>8</sub> (2.0) | DCE                | TBAI (10) | 120 | 24 | <b>73</b> |
| 15 | K <sub>2</sub> S <sub>2</sub> O <sub>8</sub> (2.0) | DCE                | TBAI (20) | 120 | 24 | 56        |
| 16 | K <sub>2</sub> S <sub>2</sub> O <sub>8</sub> (2.0) | DCE                | TBAI (50) | 120 | 24 | 34        |
| 17 | K <sub>2</sub> S <sub>2</sub> O <sub>8</sub> (2.0) | DCE                | TBAI (10) | 100 | 24 | 39        |
| 18 | K <sub>2</sub> S <sub>2</sub> O <sub>8</sub> (2.0) | DCE                | TBAI (10) | 140 | 24 | 71        |
| 19 | K <sub>2</sub> S <sub>2</sub> O <sub>8</sub> (2.0) | DCE                | TBAI (10) | 120 | 18 | 55        |
| 20 | K <sub>2</sub> S <sub>2</sub> O <sub>8</sub> (2.0) | DCE                | TBAI (10) | 120 | 36 | 75        |

<sup>a</sup> Reaction conditions: **1a** (0.2 mmol), **2a** (0.4 mmol), CuCl (20 mol%), K<sub>2</sub>S<sub>2</sub>O<sub>8</sub>, TBAI, solvent (2 mL). Isolated yield.

## General Procedure for thio/selenocyanation of Quinolines

To a 15 mL sealed tube with a magnetic stirring bar were added aminoquinolines derivatives (**1**, 0.2 mmol), KSCN/SeCN (**2**, 0.4 mmol), CuCl (20 mol%), K<sub>2</sub>S<sub>2</sub>O<sub>8</sub> (0.4 mmol), TBAI (10 mol%) and DCE (2 mL). The reaction mixture was placed in an oil bath at 120 °C and vigorously stirred for 24 h. Afterward it was cooled to ambient temperature, filtered through a pad of celite and then washed with CH<sub>2</sub>Cl<sub>2</sub> (3 × 5 mL). The solvents were removed under reduced pressure and the crude reaction mixture was purified by flash chromatography using *PE/EA* = 30:1 ~ 15:1 as an eluent to obtain the desired product.

## Analytical Data for the Products

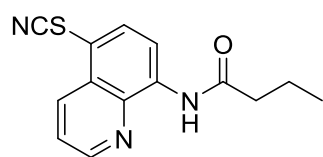

### *N*-(quinolin-5-thiocyanate-8-yl)butanamide (**3a**)

Obtained as a white solid (39.6 mg, 73%); m.p. 99 – 101 °C; IR (KBr), cm<sup>-1</sup>: 3332, 2960, 2921, 2152, 1691, 1514, 1479, 1451, 1382, 1315, 1178, 1149, 862, 815, 792, 693; <sup>1</sup>H NMR (300 MHz, CDCl<sub>3</sub>) δ 9.93 (s, 1H), 8.89 (dd, *J* = 4.2, 1.5 Hz, 1H), 8.81 (d, *J* = 8.3 Hz, 1H), 8.66 (dd, *J* = 8.5, 1.5 Hz, 1H), 7.96 (d, *J* = 8.3 Hz, 1H), 7.68 (dd, *J* = 8.5, 4.2 Hz, 1H), 2.57 (t, *J* = 7.5 Hz, 2H), 1.92 – 1.78 (m, 2H), 1.06 (t, *J* = 7.4 Hz, 3H); <sup>13</sup>C NMR (75 MHz, CDCl<sub>3</sub>) δ 171.78, 148.62, 138.48, 137.79, 136.01, 133.25, 127.83, 123.09, 115.59, 111.24, 110.42, 39.79, 18.67, 13.56; HRMS (ESI) calculated for C<sub>14</sub>H<sub>14</sub>N<sub>3</sub>OS [M + H]<sup>+</sup> 272.0852, found 272.0853.

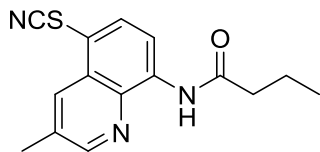

***N*-(3-methylquinolin-5-thiocyanate-8-yl)butanamide (3b)**

Obtained as a white solid (48.5 mg, 85%); m.p. 104 – 106 °C; IR (KBr),  $\text{cm}^{-1}$ : 3337, 3310, 2962, 2925, 2872, 2849, 2154, 1686, 1565, 1513, 1466, 1369, 1321, 1192, 1172, 880, 855, 764, 750;  $^1\text{H}$  NMR (300 MHz,  $\text{CDCl}_3$ )  $\delta$  9.89 (s, 1H), 8.75 (d,  $J = 8.3$  Hz, 2H), 8.45 – 8.38 (m, 1H), 7.94 (d,  $J = 8.3$  Hz, 1H), 2.64 (s, 3H), 2.56 (t,  $J = 7.5$  Hz, 2H), 1.92 – 1.76 (m, 2H), 1.06 (t,  $J = 7.4$  Hz, 3H).  $^{13}\text{C}$  NMR (75 MHz,  $\text{CDCl}_3$ )  $\delta$  171.89, 150.58, 137.90, 136.95, 136.28, 133.35, 132.12, 127.94, 114.92, 110.69, 110.63, 39.94, 18.89, 18.80, 13.65; HRMS (ESI) calculated for  $\text{C}_{15}\text{H}_{16}\text{N}_3\text{OS}$   $[\text{M}+\text{H}]^+$  286.1009, found 286.1013.

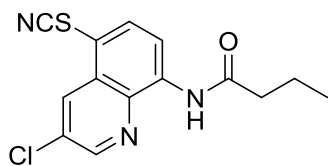

***N*-(3-chloroquinolin-5-thiocyanate-8-yl)butanamide (3c)**

Obtained as a slight yellow solid (38.5 mg, 63%); m.p. 140 – 142 °C. IR (KBr),  $\text{cm}^{-1}$ : 3314, 2955, 2921, 2851, 2156, 1692, 1560, 1522, 1465, 1364, 1316, 1276, 1261, 1178, 1107, 858, 764, 750;  $^1\text{H}$  NMR (300 MHz,  $\text{CDCl}_3$ )  $\delta$  9.76 (s, 1H), 8.84 (d,  $J = 8.3$  Hz, 1H), 8.81 (d,  $J = 2.2$  Hz, 1H), 8.66 (d,  $J = 2.2$  Hz, 1H), 8.03 (d,  $J = 8.3$  Hz, 1H), 2.57 (t,  $J = 7.5$  Hz, 2H), 1.92 – 1.76 (m, 2H), 1.06 (t,  $J = 7.4$  Hz, 3H);  $^{13}\text{C}$  NMR (75 MHz,  $\text{CDCl}_3$ )  $\delta$  171.95, 148.26, 138.32, 137.90, 136.78, 131.92, 131.61, 128.84, 116.23, 110.07, 40.04, 18.83, 13.67; HRMS (ESI) calculated for  $\text{C}_{14}\text{H}_{13}\text{ClN}_3\text{OS}$   $[\text{M}+\text{H}]^+$  306.0462, found 306.0467.

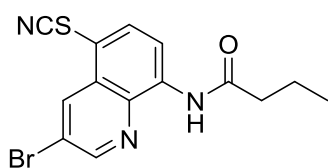

***N*-(3-bromoquinolin-5-thiocyanate-8-yl)butanamide (3d)**

Obtained as a slight yellow solid (42.7 mg, 61%); m.p. 134 – 136 °C; IR (KBr),  $\text{cm}^{-1}$ : 3316, 2958, 2924, 2851, 2156, 1692, 1655, 1557, 1523, 1460, 1385, 1314, 1178, 1101, 967, 895, 869, 843, 719, 637;  $^1\text{H}$  NMR (300 MHz,  $\text{CDCl}_3$ )  $\delta$  9.75 (s, 1H), 8.89 (d,  $J = 2.1$  Hz, 1H), 8.86 (d,  $J = 8.3$  Hz, 1H), 8.82 (d,  $J = 2.1$  Hz, 1H), 8.02 (d,  $J = 8.3$  Hz, 1H), 2.57 (t,  $J = 7.5$  Hz, 2H), 1.92 – 1.77 (m, 2H), 1.06 (t,  $J = 7.4$  Hz, 3H);  $^{13}\text{C}$  NMR (75 MHz,  $\text{CDCl}_3$ )  $\delta$  171.96, 150.00, 138.28, 137.75, 136.80, 135.01, 129.23, 120.26, 116.24, 110.46, 110.10, 39.95, 18.77, 13.66; HRMS (ESI) calculated for  $\text{C}_{14}\text{H}_{12}\text{BrN}_3\text{NaOS}$   $[\text{M}+\text{Na}]^+$  371.9777, found 371.9786.

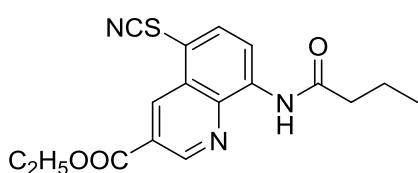

***N*-(3-ethoxycarbonyl-5-thiocyanate-8-yl)butanamide (3e)**

Obtained as a white solid (33.0 mg, 48%); m.p. 160 – 162 °C; IR (KBr),  $\text{cm}^{-1}$ : 3333, 2959, 2924, 2867, 2837, 2155, 1717, 1693, 1607, 1521, 1471, 1400, 1388, 1320, 1278, 1234, 1175, 1112, 1020, 860, 767, 750, 708;  $^1\text{H}$  NMR (300 MHz,  $\text{CDCl}_3$ )  $\delta$  9.88 (s, 1H), 9.42 (d,  $J = 1.8$  Hz, 1H), 9.28 (d,  $J = 1.8$  Hz, 1H), 8.94 (d,  $J = 8.3$  Hz, 1H), 8.06 (d,  $J = 8.3$  Hz, 1H), 4.54 (q,  $J = 7.1$  Hz, 2H), 2.58 (t,  $J = 7.4$  Hz, 2H), 1.92 – 1.80 (m, 2H), 1.50 (t,  $J = 7.1$  Hz, 3H), 1.07 (t,  $J = 7.4$  Hz, 3H);  $^{13}\text{C}$  NMR (75 MHz,  $\text{CDCl}_3$ )  $\delta$  172.11, 164.44, 148.84, 140.38, 138.16, 137.21, 135.77, 127.25, 125.60, 117.97, 113.03, 110.20, 62.13, 40.10, 18.88, 14.31, 13.72; HRMS (ESI) calculated for  $\text{C}_{17}\text{H}_{17}\text{NaN}_3\text{O}_3\text{S}$   $[\text{M}+\text{Na}]^+$  366.0883, found 366.0898.

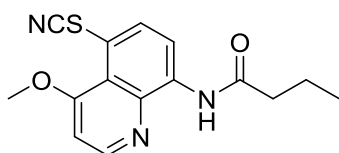

***N*-(4-methoxyquinolin-5-thiocyanate-8-yl)butanamide (3g)**

Obtained as a white solid (47.0 mg, 78%); m.p. 168 – 170 °C; IR (KBr),  $\text{cm}^{-1}$ : 3333, 2964, 2920, 2849, 2152, 1683, 1596, 1530, 1485, 1455, 1371, 1322, 1179, 1035, 967, 820, 692;  $^1\text{H}$  NMR (300

MHz, CDCl<sub>3</sub>)  $\delta$  9.80 (s, 1H), 8.80 (d,  $J$  = 8.6 Hz, 1H), 8.66 (d,  $J$  = 5.2 Hz, 1H), 7.82 (d,  $J$  = 8.6 Hz, 1H), 6.84 (d,  $J$  = 5.2 Hz, 1H), 4.08 (s, 3H), 2.53 (t,  $J$  = 7.5 Hz, 2H), 1.91 – 1.76 (m, 2H), 1.05 (t,  $J$  = 7.4 Hz, 3H); <sup>13</sup>C NMR (75 MHz, CDCl<sub>3</sub>)  $\delta$  171.67, 162.17, 149.62, 140.07, 134.23, 126.23, 118.02, 116.62, 112.91, 111.66, 101.79, 55.87, 40.01, 18.90, 13.73; HRMS (ESI) calculated for C<sub>15</sub>H<sub>16</sub>N<sub>3</sub>O<sub>2</sub>S [M+H]<sup>+</sup> 302.0958, found 302.0965.

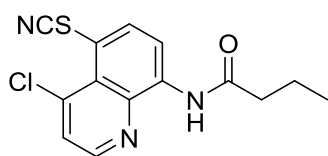

***N*-(4-chloroquinolin-5-thiocyanate-8-yl)butanamide (3h)**

Obtained as a slight yellow solid (43.4 mg, 71%); m.p. 140 – 142 °C; IR (KBr), cm<sup>-1</sup>: 3336, 3302, 2960, 2926, 2869, 2152, 1692, 1578, 1517, 1478, 1414, 1358, 1316, 1178, 1135, 909, 793, 735, 696; <sup>1</sup>H NMR (300 MHz, CDCl<sub>3</sub>)  $\delta$  9.90 (s, 1H), 8.88 (d,  $J$  = 8.5 Hz, 1H),

8.69 (d,  $J$  = 4.7 Hz, 1H), 8.06 (d,  $J$  = 8.6 Hz, 1H), 7.63 (d,  $J$  = 4.6 Hz, 1H), 2.55 (t,  $J$  = 7.5 Hz, 2H), 1.92 – 1.76 (m, 2H), 1.06 (t,  $J$  = 7.4 Hz, 3H); <sup>13</sup>C NMR (75 MHz, CDCl<sub>3</sub>)  $\delta$  171.88, 147.70, 141.40, 140.55, 136.73, 134.56, 125.05, 120.80, 116.85, 112.39, 111.15, 40.08, 18.85, 13.71; HRMS (ESI) calculated for C<sub>14</sub>H<sub>13</sub>ClN<sub>3</sub>OS [M+H]<sup>+</sup> 306.0462, found 306.0469.

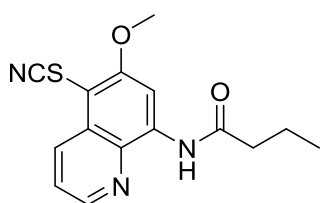

***N*-(6-methoxyquinolin-5-thiocyanate-8-yl)butanamide (3i)**

Obtained as a white solid (53.0 mg, 88%); m.p. 122-124 °C; IR (KBr), cm<sup>-1</sup>: 3335, 3317, 2964, 2941, 2873, 2156, 1691, 1612, 1587, 1561, 1526, 1459, 1397, 1334, 1205, 1171, 1085, 903, 858, 803, 782, 716; <sup>1</sup>H NMR (300 MHz, CDCl<sub>3</sub>)  $\delta$  9.99 (s, 1H), 8.86 (s, 1H), 8.71 (dd,  $J$  = 4.2, 1.2 Hz, 1H), 8.64 (dd,  $J$  = 8.6, 1.2 Hz, 1H), 7.61 (dd,  $J$  = 8.6, 4.2 Hz, 1H), 4.14 (s, 3H), 2.59 (t,  $J$  = 7.4 Hz, 2H), 1.93 – 1.77 (m, 2H), 1.07 (t,  $J$  = 7.4 Hz, 3H); <sup>13</sup>C NMR (75 MHz, CDCl<sub>3</sub>)  $\delta$  172.30, 160.29, 146.04, 139.43, 134.36, 132.46, 129.59, 123.70, 110.84, 103.14, 94.22, 56.92, 39.94, 18.67, 13.65; HRMS (ESI) calculated for C<sub>15</sub>H<sub>16</sub>N<sub>3</sub>O<sub>2</sub>S [M+H]<sup>+</sup> 302.0958, found 302.0959.

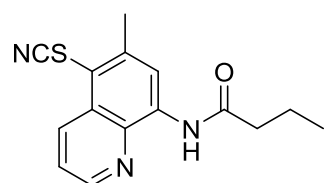

***N*-(6-methylquinolin-5-thiocyanate-8-yl)butanamide (3j)**

Obtained as a slight yellow solid (46.2 mg, 81%); m.p. 120 – 122 °C; IR (KBr), cm<sup>-1</sup>: 3350, 3312, 2964, 2923, 2851, 2154, 1689, 1661, 1520, 1467, 1397, 1365, 1326, 1179, 886, 784, 749; <sup>1</sup>H NMR (300 MHz, CDCl<sub>3</sub>)  $\delta$  9.90 (s, 1H), 8.85 (s, 1H), 8.83 (dd,  $J$  = 4.2, 1.5 Hz, 1H), 8.77 (dd,  $J$  = 8.6, 1.5 Hz, 1H), 7.66 (dd,  $J$  = 8.6, 4.2 Hz, 1H), 2.84 (s, 3H), 2.57 (t,  $J$  = 7.5 Hz, 2H), 1.93 – 1.79 (m, 2H), 1.07 (t,  $J$  = 7.4 Hz, 3H); <sup>13</sup>C NMR (75 MHz, CDCl<sub>3</sub>)  $\delta$  171.96, 147.66, 145.48, 137.66, 137.31, 133.49, 129.04, 123.21, 118.62, 110.23, 109.75, 39.91, 22.66, 18.78, 13.62; HRMS (ESI) calculated for C<sub>15</sub>H<sub>16</sub>N<sub>3</sub>OS [M+H]<sup>+</sup> 286.1009, found 286.1007.

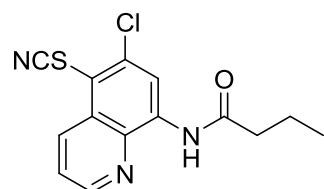

***N*-(6-chloroquinolin-5-thiocyanate-8-yl)butanamide (3k)**

Obtained as a slight yellow solid (41.0 mg, 67%); m.p. 155 – 157 °C; IR (KBr), cm<sup>-1</sup>: 3316, 2964, 2920, 2849, 2160, 1699, 1559, 1507, 1460, 1363, 1348, 1315, 1174, 1149, 871, 809, 783, 720; <sup>1</sup>H NMR (300 MHz, CDCl<sub>3</sub>)  $\delta$  9.93 (s, 1H), 9.04 (s, 1H), 8.88 (d,  $J$  = 4.2 Hz, 1H), 8.76 (d,  $J$  = 8.6 Hz, 1H), 7.72 (dd,  $J$  = 8.6, 4.3 Hz, 1H), 2.58 (t,  $J$  = 7.4 Hz, 2H), 1.92 – 1.79 (m, 2H), 1.07 (t,  $J$  = 7.4 Hz, 3H); <sup>13</sup>C NMR (75 MHz, CDCl<sub>3</sub>)  $\delta$  172.03, 148.52, 141.89, 138.49, 137.29, 134.07, 129.41, 124.13, 117.36, 109.73, 109.28, 39.88, 18.71, 13.64; HRMS (ESI) calculated for C<sub>14</sub>H<sub>13</sub>ClN<sub>3</sub>OS [M+H]<sup>+</sup> 306.0462, found 306.0469.

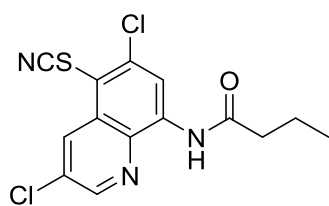

***N*-(3,6-dichloroquinolin-5-thiocyanate-8-yl)butanamide (3l)**

Obtained as a slight yellow solid (38.8 mg, 52%); m.p. 133 – 135 °C; IR (KBr),  $\text{cm}^{-1}$ : 3351, 2963, 2921, 2851, 2156, 1704, 1598, 1552, 1509, 1455, 1361, 1309, 1174, 1143, 982, 918, 881, 657;  $^1\text{H}$  NMR (300 MHz,  $\text{CDCl}_3$ )  $\delta$  9.73 (s, 1H), 9.04 (s, 1H), 8.77 (d,  $J = 2.2$  Hz, 1H), 8.72 (d,  $J = 2.2$  Hz, 1H), 2.57 (t,  $J = 7.4$  Hz, 2H), 1.91 – 1.79 (m, 2H), 1.06 (d,  $J = 7.4$  Hz, 3H);  $^{13}\text{C}$  NMR (75 MHz,  $\text{CDCl}_3$ )  $\delta$  172.09, 147.97, 143.67, 138.69, 135.37, 132.52( $\times 2$ ), 130.19, 117.79, 109.02, 108.90, 39.97, 18.74, 13.67; HRMS (ESI) calculated for  $\text{C}_{14}\text{H}_{12}\text{Cl}_2\text{N}_3\text{OS}$   $[\text{M}+\text{H}]^+$  340.0073, found 340.0071.

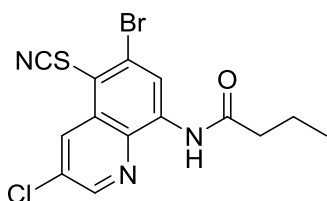

***N*-(3-chloro-6-bromoquinolin-5-thiocyanate-8-yl)butanamide (3m)**

Obtained as a slight yellow solid (40.0 mg, 52%); m.p. 154 – 156 °C; IR (KBr),  $\text{cm}^{-1}$ : 3347, 2962, 2922, 2853, 2154, 1705, 1596, 1556, 1517, 1458, 1362, 1309, 1182, 1101, 977, 907, 881, 764, 749;  $^1\text{H}$  NMR (300 MHz,  $\text{CDCl}_3$ )  $\delta$  9.71 (s, 1H), 9.20 (s, 1H), 8.78 (d,  $J = 2.2$  Hz, 1H), 8.74 (d,  $J = 2.2$  Hz, 1H), 2.57 (t,  $J = 7.4$  Hz, 2H), 1.91 – 1.77 (m, 2H), 1.06 (d,  $J = 7.4$  Hz, 3H);  $^{13}\text{C}$  NMR (75 MHz,  $\text{CDCl}_3$ )  $\delta$  172.04, 147.98, 138.41, 135.54, 134.95, 132.83, 132.50, 132.42, 130.23, 120.62, 117.67, 111.47, 108.92, 39.89, 18.68, 13.65; HRMS (ESI) calculated for  $\text{C}_{14}\text{H}_{12}\text{BrClN}_3\text{OS}$   $[\text{M}+\text{H}]^+$  383.9567, found 383.9571.

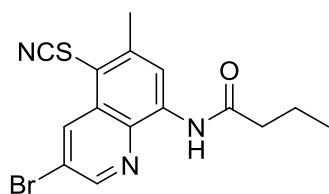

***N*-(6-methyl-3-bromoquinolin-5-thiocyanate-8-yl)butanamide (3n)**

Obtained as a slight yellow solid (53.2 mg, 73%); m.p. 140 – 142 °C; IR (KBr),  $\text{cm}^{-1}$ : 3358, 2961, 2922, 2850, 2155, 2155, 1698, 1606, 1553, 1517, 1457, 1394, 1310, 1180, 955, 892;  $^1\text{H}$  NMR (300 MHz,  $\text{CDCl}_3$ )  $\delta$  9.70 (s, 1H), 8.89 (d,  $J = 2.0$  Hz, 1H), 8.85 (s, 1H), 8.80 (d,  $J = 1.9$  Hz, 1H), 2.84 (s, 3H), 2.56 (t,  $J = 7.4$  Hz, 2H), 1.91 – 1.77 (m, 2H), 1.06 (t,  $J = 7.4$  Hz, 3H);  $^{13}\text{C}$  NMR (75 MHz,  $\text{CDCl}_3$ )  $\delta$  172.14, 149.01, 147.36, 137.69, 135.97, 135.26, 130.41, 120.36, 119.19, 109.91, 108.99, 40.05, 22.96, 18.86, 13.71; HRMS (ESI) calculated for  $\text{C}_{15}\text{H}_{15}\text{BrN}_3\text{OS}$   $[\text{M}+\text{H}]^+$  364.0114, found 364.0124.

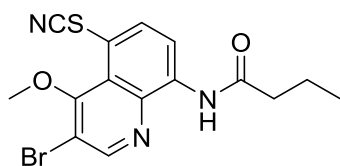

***N*-(4-methoxy-3-bromoquinolin-5-thiocyanate-8-yl)butanamide (3o)**

Obtained as a white solid (51.7 mg, 68%); m.p. 127 – 129 °C; IR (KBr),  $\text{cm}^{-1}$ : 3357, 2962, 2929, 2872, 2153, 1694, 1570, 1512, 1472, 1447, 1352, 1333, 1276, 1260, 1177, 966, 830, 764, 750;  $^1\text{H}$  NMR (300 MHz,  $\text{CDCl}_3$ )  $\delta$  9.61 (s, 1H), 8.86 (d,  $J = 8.6$  Hz, 1H), 8.81 (s, 1H), 7.91 (d,  $J = 8.6$  Hz, 1H), 4.16 (s, 3H), 2.54 (t,  $J = 7.5$  Hz, 2H), 1.90 – 1.76 (m, 2H), 1.05 (t,  $J = 7.4$  Hz, 3H);  $^{13}\text{C}$  NMR (75 MHz,  $\text{CDCl}_3$ )  $\delta$  171.75, 160.00, 151.96, 139.44, 134.88, 128.08, 121.97, 117.33, 112.12, 111.12, 110.20, 62.09, 40.03, 18.89, 13.73; HRMS (ESI) calculated for  $\text{C}_{15}\text{H}_{14}\text{BrN}_3\text{O}_2\text{S}$   $[\text{M}+\text{H}]^+$  380.0063, found 380.0070.

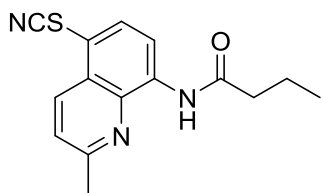

***N*-(2-methylquinolin-5-thiocyanate-8-yl)butanamide (3p)**

Obtained as a slight yellow solid (13.7 mg, 24%); m.p. 106 – 108 °C; IR (KBr),  $\text{cm}^{-1}$ : 3316, 2959, 2922, 2845, 2153, 1687, 1655, 1561, 1526, 1489, 1458, 1375, 1328, 1275, 1261, 857, 764, 750;  $^1\text{H}$  NMR (300 MHz,  $\text{CDCl}_3$ )  $\delta$  9.98 (s, 1H), 8.79 (d,  $J = 8.2$  Hz, 1H), 8.55 (d,  $J = 8.7$  Hz, 1H), 7.89 (d,  $J = 8.3$  Hz, 1H), 7.55 (d,  $J = 8.7$  Hz, 1H), 2.80 (s, 3H), 2.58 (t,  $J = 7.5$  Hz, 2H), 1.93 – 1.79 (m, 2H), 1.07 (t,  $J = 7.4$  Hz, 3H);  $^{13}\text{C}$  NMR (75 MHz,  $\text{CDCl}_3$ )  $\delta$  171.99, 158.37, 137.46, 138.35, 135.27, 133.66, 126.48, 124.23, 115.99, 111.43, 110.78, 40.07, 25.11, 18.85, 13.75; HRMS (ESI) calculated for  $\text{C}_{15}\text{H}_{16}\text{N}_3\text{OS}$   $[\text{M}+\text{H}]^+$  286.1009, found 286.1013.

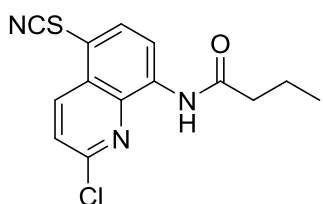

***N*-(2-chloroquinolin-5-thiocyanate-8-yl)butanamide (3q)**

Obtained as a slight yellow solid (6.7 mg, 11%); m.p. 130 – 132 °C; IR (KBr),  $\text{cm}^{-1}$ : 3313, 2957, 2921, 2851, 2160, 1693, 1655, 1631, 1524, 1477, 1320, 1275, 1179, 1156, 1144, 1109, 853, 826, 764, 750, 715;  $^1\text{H}$  NMR (300 MHz,  $\text{CDCl}_3$ )  $\delta$  9.53 (s, 1H), 8.89 (d,  $J = 8.4$  Hz, 1H), 8.64 (d,  $J = 8.8$  Hz, 1H), 7.98 (d,  $J = 8.3$  Hz, 1H), 7.66 (d,  $J = 8.8$  Hz, 1H), 2.59 (t,  $J = 7.5$  Hz, 2H), 1.92 – 1.79 (m, 2H), 1.07 (t,  $J = 7.4$  Hz, 3H);  $^{13}\text{C}$  NMR (75 MHz,  $\text{CDCl}_3$ )  $\delta$  172.13, 150.50, 138.59, 137.38, 136.69, 129.90, 127.16, 124.79, 117.41, 111.82, 110.26, 40.03, 18.80, 13.72; HRMS (ESI) calculated for  $\text{C}_{14}\text{H}_{13}\text{ClN}_3\text{OS}$   $[\text{M}+\text{H}]^+$  306.0462, found 306.0469.

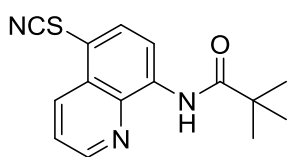

***N*-(quinolin-5-thiocyanate-8-yl)pivalamide (4a)**

Obtained as a white solid (35.4 mg, 62%); m.p. 123-125 °C; IR (KBr),  $\text{cm}^{-1}$ : 3366, 3344, 2963, 2919, 2871, 2155, 1686, 1569, 1516, 1482, 1451, 1396, 1376, 1365, 1318, 1171, 1140, 841, 791, 675;  $^1\text{H}$  NMR (300 MHz,  $\text{CDCl}_3$ )  $\delta$  10.40 (s, 1H), 8.93 (dd,  $J = 4.2, 1.3$  Hz, 1H), 8.83 (d,  $J = 8.3$  Hz, 1H), 8.68 (dd,  $J = 8.5, 1.1$  Hz, 1H), 7.98 (d,  $J = 8.3$  Hz, 1H), 7.70 (dd,  $J = 8.5, 4.2$  Hz, 1H), 1.43 (s, 9H);  $^{13}\text{C}$  NMR (75 MHz,  $\text{CDCl}_3$ )  $\delta$  177.41, 148.89, 139.16, 138.15, 136.27, 133.47, 128.04, 123.21, 115.64, 111.32, 110.53, 40.36, 27.46 ( $\times 3$ ); HRMS (ESI) calculated for  $\text{C}_{15}\text{H}_{16}\text{N}_3\text{OS}$   $[\text{M}+\text{H}]^+$  286.1009, found 286.1015.

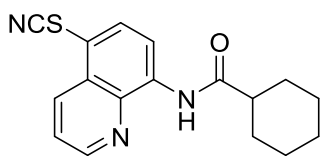

***N*-(quinolin-5-thiocyanate-8-yl)cyclohexanecarboxamide (4b)**

Obtained as a white solid (40.5 mg, 65%); m.p. 130 – 132 °C; IR (KBr),  $\text{cm}^{-1}$ : 3348, 2925, 2851, 2151, 1693, 1586, 1516, 1480, 1450, 1380, 1368, 1319, 1149, 1128, 838, 812, 795, 653;  $^1\text{H}$  NMR (300 MHz,  $\text{CDCl}_3$ )  $\delta$  10.03 (s, 1H), 8.93 (d,  $J = 3.2$  Hz, 1H), 8.84 (d,  $J = 8.2$  Hz, 1H), 8.69 (d,  $J = 8.3$  Hz, 1H), 7.98 (d,  $J = 8.2$  Hz, 1H), 7.71 (dd,  $J = 8.4, 4.1$  Hz, 1H), 2.50 (t,  $J = 11.6$  Hz, 1H), 2.09 (d,  $J = 11.9$  Hz, 2H), 1.89 (d,  $J = 12.0$  Hz, 2H), 1.73 – 1.58 (m, 3H), 1.46 – 1.27 (m, 3H);  $^{13}\text{C}$  NMR (75 MHz,  $\text{CDCl}_3$ )  $\delta$  175.12, 148.86, 139.05, 138.25, 136.45, 133.64, 128.22, 123.30, 115.96, 111.41, 110.62, 46.79, 29.56 ( $\times 2$ ), 25.59 ( $\times 3$ ); HRMS (ESI) calculated for  $\text{C}_{17}\text{H}_{18}\text{N}_3\text{OS}$   $[\text{M}+\text{H}]^+$  312.1165, found 312.1167.

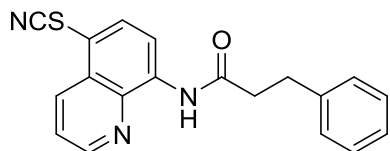

***N*-(quinolin-5-thiocyanate-8-yl)phenylpropanamide (4c)**

Obtained as a white solid (50.0 mg, 75%); m.p. 122 – 124 °C; IR (KBr),  $\text{cm}^{-1}$ : 3310, 3055, 3029, 2923, 2853, 2161, 1683, 1517, 1477, 1453, 1382, 1363, 1316, 1199, 1178, 1141, 1076, 856, 787, 748, 702, 654;  $^1\text{H}$  NMR (300 MHz,  $\text{CDCl}_3$ )  $\delta$  9.90 (s, 1H), 8.92 – 8.86 (m, 1H), 8.83 (d,  $J = 8.3$  Hz, 1H), 8.67 (dd,  $J = 8.5, 1.3$  Hz, 1H), 7.98 (d,  $J = 8.3$  Hz, 1H), 7.68 (dd,  $J = 8.5, 4.2$  Hz, 1H), 7.33 – 7.28 (t,  $J = 6.7$  Hz, 4H), 7.25 – 7.17 (m, 1H), 3.15 (t,  $J = 7.7$  Hz, 2H), 2.92 (t,  $J = 7.8$  Hz, 2H);  $^{13}\text{C}$  NMR (75 MHz,  $\text{CDCl}_3$ )  $\delta$  171.02, 148.76, 140.29, 138.71, 137.85, 136.23, 133.50, 128.52( $\times 2$ ), 128.28 ( $\times 2$ ), 128.08, 126.28, 123.26, 115.95, 111.67, 110.51, 39.57, 31.12; HRMS (ESI) calculated for  $\text{C}_{19}\text{H}_{16}\text{N}_3\text{OS}$   $[\text{M}+\text{H}]^+$  334.1009, found 334.1013.

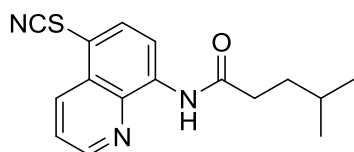

**4-methyl-*N*-(quinolin-5-thiocyanate-8-yl)pentanamide (4d)**

Obtained as a white solid (45.5 mg, 76%); m.p. 92 – 94 °C; IR (KBr),  $\text{cm}^{-1}$ : 3341, 2957, 2931, 2869, 2360, 2342, 2152, 1698, 1568, 1518, 1479, 1451, 1383, 1317, 1176, 1146, 836, 812, 794, 749;  $^1\text{H}$  NMR (300 MHz,  $\text{CDCl}_3$ )  $\delta$  9.95 (s, 1H), 8.93 (d,  $J = 4.1$  Hz, 1H), 8.83 (d,  $J = 8.3$  Hz, 1H), 8.70 (d,  $J = 8.5$  Hz, 1H), 7.99 (d,  $J = 8.3$  Hz, 1H), 7.71 (dd,  $J = 8.5, 4.2$  Hz, 1H), 2.59 (t,  $J = 7.5$  Hz, 2H), 1.74 – 1.67 (m, 3H), 0.98 (d,  $J = 6.1$  Hz, 6H);  $^{13}\text{C}$  NMR (75 MHz,  $\text{CDCl}_3$ )  $\delta$  172.28, 148.81, 138.79, 138.06, 136.31, 133.54, 128.13, 123.26, 115.87, 111.46, 110.52, 36.13, 34.08, 27.67, 22.26 ( $\times 2$ ); HRMS (ESI) calculated for  $\text{C}_{16}\text{H}_{18}\text{N}_3\text{OS}$   $[\text{M}+\text{H}]^+$  300.1165, found 300.1170.

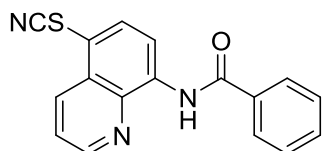

***N*-(quinolin-5-thiocyanate-8-yl)benzamide (4e)**

Obtained as a slight yellow solid (40.9 mg, 67%); m.p. 164 – 165 °C; IR (KBr),  $\text{cm}^{-1}$ : 3366, 2920, 2850, 2154, 1678, 1581, 1532, 1480, 1382, 1366, 1327, 1201, 1157, 852, 791, 701, 687, 645;  $^1\text{H}$  NMR (300 MHz,  $\text{CDCl}_3$ )  $\delta$  10.89 (s, 1H), 9.02 – 8.95 (m, 2H), 8.73 (dd,  $J = 8.5, 1.4$  Hz, 1H), 8.13 – 8.03 (m, 3H), 7.74 (dd,  $J = 8.5, 4.2$  Hz, 1H), 7.68 – 7.53 (m, 3H);  $^{13}\text{C}$  NMR (75 MHz,  $\text{CDCl}_3$ )  $\delta$  165.39, 149.01, 139.19, 138.02, 136.28, 134.19, 133.62, 132.30, 128.85 ( $\times 2$ ), 128.17, 127.24 ( $\times 2$ ), 123.40, 116.00, 111.92, 110.55; HRMS (ESI) calculated for  $\text{C}_{17}\text{H}_{12}\text{N}_3\text{OS}$   $[\text{M}+\text{H}]^+$  306.0696, found 306.0699.

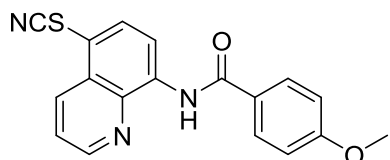

**4-methoxy-*N*-(quinolin-5-thiocyanate-8-yl)benzamide (4f)**

Obtained as a slight yellow solid (47.6 mg, 71%); m.p. 180 – 182 °C; IR (KBr),  $\text{cm}^{-1}$ : 3340, 2920, 2849, 2150, 1670, 1606, 1529, 1508, 1480, 1379, 1310, 1264, 1186, 1122, 1099, 1021, 842, 815, 787, 757, 641;  $^1\text{H}$  NMR (300 MHz,  $\text{CDCl}_3$ )  $\delta$  10.81 (s, 1H), 9.01 – 8.93 (m, 2H), 8.72 (dd,  $J = 8.5, 1.5$  Hz, 1H), 8.09 – 8.01 (m, 3H), 7.73 (dd,  $J = 8.5, 4.2$  Hz, 1H), 7.10 – 7.01 (m, 2H), 3.91 (s, 3H);  $^{13}\text{C}$  NMR (75 MHz,  $\text{CDCl}_3$ )  $\delta$  164.81, 162.80, 148.88, 139.15, 138.22, 136.31, 133.55, 129.18 ( $\times 2$ ), 128.14, 126.41, 123.31, 115.77 ( $\times 2$ ), 114.01, 111.45, 110.61, 55.42; HRMS (ESI) calculated for  $\text{C}_{18}\text{H}_{14}\text{N}_3\text{O}_2\text{S}$   $[\text{M}+\text{H}]^+$  336.0801, found 336.0812.



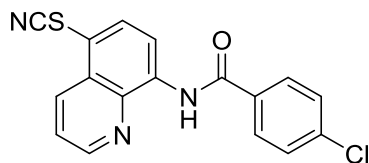

**4-chloro-*N*-(quinolin-5-thiocyanate-8-yl)benzamide(4g)**

Obtained as a slight yellow solid (43.5 mg, 64%); m.p. 214 – 216 °C; IR (KBr),  $\text{cm}^{-1}$ : 3330, 2152, 1676, 1595, 1522, 1475, 1379, 1319, 1258, 1102, 1007, 896, 833, 790, 748, 652;  $^1\text{H}$  NMR (300 MHz,  $\text{CDCl}_3$ )  $\delta$  10.83 (s, 1H), 8.99 – 8.94 (m, 2H), 8.73 (dd,  $J = 8.5, 1.4$  Hz, 1H), 8.03 (t,  $J = 8.6$  Hz, 3H), 7.73 (dd,  $J = 8.5, 4.2$  Hz, 1H), 7.54 (d,  $J = 8.6$  Hz, 2H).  $^{13}\text{C}$  NMR (75 MHz,  $\text{CDCl}_3$ )  $\delta$  164.46, 149.16, 139.30, 138.72, 137.92, 136.35, 133.83, 132.74, 129.21 ( $\times 2$ ), 128.76 ( $\times 2$ ), 128.31, 123.55, 116.23, 112.40, 110.49; HRMS (ESI) calculated for  $\text{C}_{17}\text{H}_{11}\text{ClN}_3\text{OS}$   $[\text{M}+\text{H}]^+$  340.0306, found 340.0310.

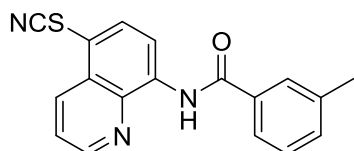

**3-methyl-*N*-(quinolin-5-thiocyanate-8-yl)benzamide (4h)**

Obtained as a slight yellow solid (46.0 mg, 72%); m.p. 174 – 176 °C; IR (KBr),  $\text{cm}^{-1}$ : 3368, 2918, 2849, 2152, 1677, 1587, 1530, 1482, 1382, 1325, 1270, 852, 810, 791, 727, 684, 650;  $^1\text{H}$  NMR (300 MHz,  $\text{CDCl}_3$ )  $\delta$  10.84 (s, 1H), 9.02 – 8.96 (m, 2H), 8.72 (dd,  $J = 8.5, 1.5$  Hz, 1H), 8.05 (d,  $J = 8.3$  Hz, 1H), 7.89 – 7.83 (m, 2H), 7.73 (dd,  $J = 8.5, 4.2$  Hz, 1H), 7.51 – 7.40 (m, 2H), 2.50 (s, 3H);  $^{13}\text{C}$  NMR (75 MHz,  $\text{CDCl}_3$ )  $\delta$  165.71, 149.03, 139.30, 138.81, 138.19, 136.36, 134.29, 133.67, 133.08, 128.72, 128.24, 128.05, 124.21, 123.40, 116.08, 111.88, 110.55, 21.43; HRMS (ESI) calculated for  $\text{C}_{18}\text{H}_{14}\text{N}_3\text{OS}$   $[\text{M}+\text{H}]^+$  320.0852, found 320.0848.

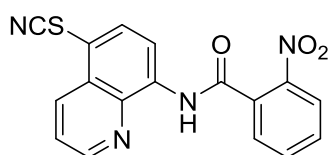

**2-nitro-*N*-(quinolin-5-thiocyanate-8-yl)benzamide (4i)**

Obtained as a slight yellow solid (42.0 mg, 60%); m.p. 182 – 184 °C; IR (KBr),  $\text{cm}^{-1}$ : 3392, 2923, 2853, 2160, 1683, 1586, 1514, 1483, 1442, 1381, 1356, 1317, 1131, 1079, 938, 899, 854, 842, 776, 720;  $^1\text{H}$  NMR (300 MHz,  $\text{CDCl}_3$ )  $\delta$  10.29 (s, 1H), 8.94 (d,  $J = 8.2$  Hz, 1H), 8.87 (dd,  $J = 4.2, 1.5$  Hz, 1H), 8.72 (dd,  $J = 8.6, 1.5$  Hz, 1H), 8.17 (dd,  $J = 8.1, 0.7$  Hz, 1H), 8.07 (d,  $J = 8.2$  Hz, 1H), 7.85 – 7.68 (m, 4H);  $^{13}\text{C}$  NMR (75 MHz,  $\text{CDCl}_3$ )  $\delta$  164.52, 149.11, 146.38, 138.78, 137.55, 135.96, 133.91, 133.61, 132.24, 131.07, 128.37, 128.08, 124.68, 123.51, 116.57, 113.09, 110.39; HRMS (ESI) calculated for  $\text{C}_{17}\text{H}_{11}\text{N}_4\text{O}_3\text{S}$   $[\text{M}+\text{H}]^+$  351.0546, found 351.0554.

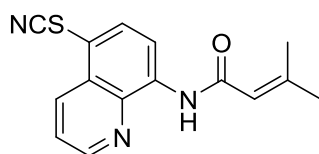

**3-methyl-*N*-(quinolin-5-thiocyanate-8-yl)but-2-enamide (4j)**

Obtained as a slight yellow solid (41.9 mg, 74%); m.p. 179 – 181 °C; IR (KBr),  $\text{cm}^{-1}$ : 3304, 3006, 2984, 2914, 2840, 2155, 1673, 1640, 1518, 1369, 1318, 1276, 1261, 1139, 847, 764, 750;  $^1\text{H}$  NMR (300 MHz,  $\text{CDCl}_3$ )  $\delta$  9.86 (s, 1H), 8.95 – 8.85 (m, 2H), 8.68 (dd,  $J = 8.5, 1.5$  Hz, 1H), 7.98 (d,  $J = 8.3$  Hz, 1H), 7.69 (dd,  $J = 8.5, 4.2$  Hz, 1H), 5.99 (t,  $J = 1.2$  Hz, 1H), 2.30 (d,  $J = 0.9$  Hz, 3H), 1.99 (d,  $J = 0.9$  Hz, 3H);  $^{13}\text{C}$  NMR (75 MHz,  $\text{CDCl}_3$ )  $\delta$  165.15, 155.32, 148.63, 138.82, 138.55, 136.37, 133.49, 128.14, 123.20, 118.66, 115.52, 110.96, 110.66, 27.53, 20.06; HRMS (ESI) calculated for  $\text{C}_{15}\text{H}_{14}\text{N}_3\text{OS}$   $[\text{M}+\text{H}]^+$  284.0852, found 284.0858.

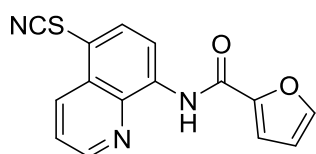

***N*-(quinolin-5-thiocyanate-8-yl)furan-2-carboxamide(4k)**

Obtained as a slight yellow solid (33.1 mg, 56%); m.p. 180 – 182 °C; IR (KBr),  $\text{cm}^{-1}$ : 3349, 2921, 2850, 2152, 1681, 1646, 1588, 1570, 1532, 1488, 1474, 1453, 1324, 1273, 1167, 1012, 812, 850, 791, 763, 676, 639, 596;  $^1\text{H}$  NMR (300 MHz,  $\text{CDCl}_3$ )  $\delta$  10.89 (s, 1H), 9.00 (dd,  $J = 4.2, 1.4$  Hz, 1H), 8.92 (d,  $J = 8.3$  Hz, 1H), 8.70 (dd,  $J = 8.5, 1.4$  Hz, 1H), 8.02 (d,  $J = 8.3$  Hz,

1H), 7.73 (dd,  $J = 8.5, 4.2$  Hz, 1H), 7.66 (d,  $J = 0.7$  Hz, 1H), 7.35 (d,  $J = 3.2$  Hz, 1H), 6.62 (dd,  $J = 3.4, 1.7$  Hz, 1H);  $^{13}\text{C}$  NMR (75 MHz,  $\text{CDCl}_3$ )  $\delta$  156.33, 149.13, 147.69, 144.92, 139.11, 137.74, 136.17, 133.55, 128.22, 123.43, 116.10, 115.96, 112.66, 112.12, 110.53; HRMS (ESI) calculated for  $\text{C}_{15}\text{H}_{10}\text{N}_3\text{O}_2\text{S}$   $[\text{M}+\text{H}]^+$  296.0488, found 296.0495.

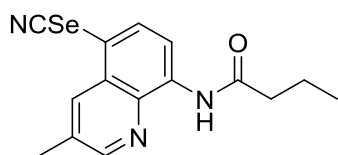

***N*-(3-methylquinolin-5-selenocyanate-8-yl)butanamide (5a)**

Obtained as a slight yellow solid (49.8 mg, 75%); m.p. 128 – 130 °C; IR (KBr),  $\text{cm}^{-1}$ : 3312, 2957, 2925, 2873, 2152, 1686, 1564, 1523, 1467, 1367, 1320, 1196, 1176, 885, 853, 721, 638;  $^1\text{H}$  NMR (300 MHz,  $\text{CDCl}_3$ )  $\delta$  9.89 (s, 1H), 8.71 (dd,  $J = 5.0, 3.1$  Hz, 2H), 8.37 (s, 1H), 8.02 (d,  $J = 8.2$  Hz, 1H), 2.64 (s, 3H), 2.56 (t,  $J = 7.5$  Hz, 2H), 1.92 – 1.79 (m, 2H), 1.06 (t,  $J = 7.4$  Hz, 3H);  $^{13}\text{C}$  NMR (75 MHz,  $\text{CDCl}_3$ )  $\delta$  171.88, 150.50, 137.82 ( $\times 2$ ), 136.96, 134.48, 133.36, 128.69, 115.11, 110.43, 101.02, 39.93, 18.81 ( $\times 2$ ), 13.65; HRMS (ESI) calculated for  $\text{C}_{15}\text{H}_{16}\text{N}_3\text{OSe}$   $[\text{M}+\text{H}]^+$  334.0453, found 334.0460.

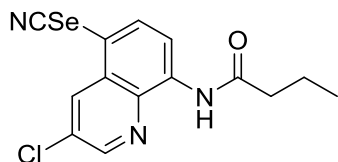

***N*-(3-chloroquinolin-5-selenocyanate-8-yl)butanamide (5b)**

Obtained as a slight yellow solid (40.9 mg, 58%); m.p. 158 – 160 °C; IR (KBr),  $\text{cm}^{-1}$ : 3308, 2959, 2921, 2850, 2154, 1684, 1632, 1556, 1522, 1460, 1361, 1316, 1180, 1105, 965, 896, 855, 723, 636;  $^1\text{H}$  NMR (300 MHz,  $\text{CDCl}_3$ )  $\delta$  9.76 (s, 1H), 8.83 – 8.78 (m, 2H), 8.63 (d,  $J = 2.2$  Hz, 1H), 8.11 (d,  $J = 8.2$  Hz, 1H), 2.57 (t,  $J = 7.5$  Hz, 2H), 1.92 – 1.78 (m, 2H), 1.07 (t,  $J = 7.4$  Hz, 3H);  $^{13}\text{C}$  NMR (75 MHz,  $\text{CDCl}_3$ )  $\delta$  172.06, 148.24, 139.65, 138.33, 136.86, 134.36, 131.66, 129.74, 116.46, 110.07, 100.46; HRMS (ESI) calculated for  $\text{C}_{14}\text{H}_{13}\text{ClN}_3\text{OSe}$   $[\text{M}+\text{H}]^+$  353.9907, found 353.9915.

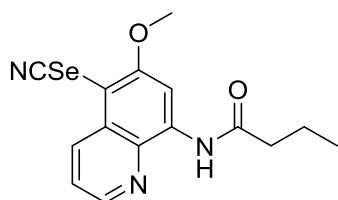

***N*-(6-methoxyquinolin-5-selenocyanate-8-yl)butanamide (5c)**

Obtained as a slight yellow solid (57.8 mg, 83%); m.p. 122 – 124 °C; IR (KBr),  $\text{cm}^{-1}$ : 3319, 2963, 2921, 2851, 2152, 1689, 1613, 1587, 1562, 1519, 1459, 1394, 1332, 1203, 1172, 1138, 1081, 899, 855, 779, 716;  $^1\text{H}$  NMR (300 MHz,  $\text{CDCl}_3$ )  $\delta$  9.99 (s, 1H), 8.87 (s, 1H), 8.69 (dd,  $J = 4.2, 1.4$  Hz, 1H), 8.60 (dd,  $J = 8.6, 1.4$  Hz, 1H), 7.59 (dd,  $J = 8.6, 4.2$  Hz, 1H), 4.11 (s, 3H), 2.58 (t,  $J = 7.4$  Hz, 2H), 1.93 – 1.80 (m, 2H), 1.07 (t,  $J = 7.4$  Hz, 3H);  $^{13}\text{C}$  NMR (75 MHz,  $\text{CDCl}_3$ )  $\delta$  172.14, 159.40, 145.89, 139.04, 134.48, 134.30, 129.79, 123.52, 102.88, 101.14, 95.29, 56.83, 39.80, 18.57, 13.57; HRMS (ESI) calculated for  $\text{C}_{15}\text{H}_{16}\text{N}_3\text{O}_2\text{Se}$   $[\text{M}+\text{H}]^+$  350.0402, found 350.0409.

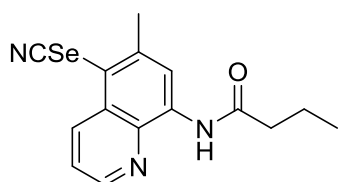

***N*-(6-methylquinolin-5-selenocyanate-8-yl)butanamide (5d)**

Obtained as a slight yellow solid (53.8 mg, 81%); m.p. 100 – 102 °C; IR (KBr),  $\text{cm}^{-1}$ : 3346, 2963, 2927, 2873, 2151, 1691, 1561, 1522, 1467, 1395, 1366, 1182, 885, 788, 750;  $^1\text{H}$  NMR (300 MHz,  $\text{CDCl}_3$ )  $\delta$  9.89 (s, 1H), 8.86 (s, 1H), 8.80 (dd,  $J = 4.2, 1.4$  Hz, 1H), 8.74 (dd,  $J = 8.6, 1.4$  Hz, 1H), 7.63 (dd,  $J = 8.6, 4.2$  Hz, 1H), 2.87 (s, 3H), 2.57 (t,  $J = 7.5$  Hz, 2H), 1.92 – 1.79 (m, 2H), 1.07 (t,  $J = 7.4$  Hz, 3H);  $^{13}\text{C}$  NMR (75 MHz,  $\text{CDCl}_3$ )  $\delta$  171.90, 147.56, 145.26, 137.44, 137.03, 135.82, 129.56, 123.15, 118.33, 111.52, 100.69, 39.85, 25.14, 18.75, 13.59; HRMS (ESI) calculated for  $\text{C}_{15}\text{H}_{16}\text{N}_3\text{OSe}$   $[\text{M}+\text{H}]^+$  334.0453, found 334.0455.

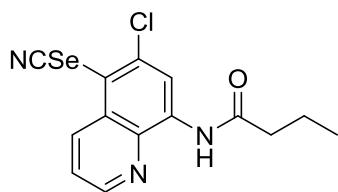

***N*-(6-chloroquinolin-5-selenocyanate-8-yl)butanamide (5e)**

Obtained as a slight yellow solid (38.8 mg, 55%); m.p. 156 – 158 °C; IR (KBr),  $\text{cm}^{-1}$ : 3314, 2962, 2921, 2851, 2155, 1698, 1557, 1509, 1460, 1378, 1358, 1344, 1312, 1176, 1150, 1077, 864, 808, 782, 717, 631;  $^1\text{H}$  NMR (300 MHz,  $\text{CDCl}_3$ )  $\delta$  9.91 (s, 1H), 9.03 (s, 1H), 8.85 (dd,  $J = 4.2, 1.5$  Hz, 1H), 8.71 (dd,  $J = 8.6, 1.5$  Hz, 1H), 7.69 (dd,  $J = 8.6, 4.2$  Hz, 1H), 2.58 (t,  $J = 7.5$  Hz, 2H), 1.92 – 1.79 (m, 2H), 1.07 (t,  $J = 7.4$  Hz, 3H);  $^{13}\text{C}$  NMR (75 MHz,  $\text{CDCl}_3$ )  $\delta$  172.09, 148.50, 141.94, 138.41, 137.39, 136.73, 130.15, 124.19, 117.34, 111.13, 100.09, 39.99, 18.81, 13.70; HRMS (ESI) calculated for  $\text{C}_{14}\text{H}_{13}\text{ClN}_3\text{OSe}$   $[\text{M}+\text{H}]^+$  353.9907, found 353.9913.

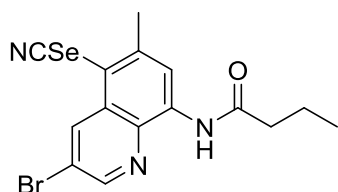

***N*-(6-methyl-3-bromoquinolin-5-selenocyanate-8-yl)butanamide (5f)**

Obtained as a slight yellow solid (52.6 mg, 64%); m.p. 130 – 132 °C; IR (KBr),  $\text{cm}^{-1}$ : 3354, 2962, 2928, 2872, 2151, 1695, 1606, 1516, 1456, 1393, 1368, 1307, 1182, 951, 928, 893, 750;  $^1\text{H}$  NMR (300 MHz,  $\text{CDCl}_3$ )  $\delta$  9.69 (s, 1H), 8.89 (d,  $J = 2.0$  Hz, 1H), 8.88 (s, 1H), 8.78 (d,  $J = 2.0$  Hz, 1H), 2.88 (s, 3H), 2.56 (t,  $J = 7.4$  Hz, 2H), 1.91 – 1.78 (m, 2H), 1.06 (t,  $J = 7.4$  Hz, 3H);  $^{13}\text{C}$  NMR (75 MHz,  $\text{CDCl}_3$ )  $\delta$  172.08, 148.86, 147.24, 137.55, 137.48, 135.78, 130.98, 120.25, 118.92, 110.48, 100.28, 40.02, 25.50, 18.85, 13.70; HRMS (ESI) calculated for  $\text{C}_{15}\text{H}_{15}\text{BrN}_3\text{OSe}$   $[\text{M}+\text{H}]^+$  411.9558, found 411.9552.

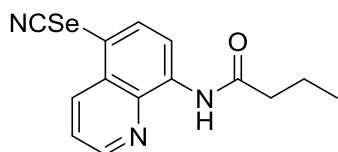

***N*-(quinolin-5-selenocyanate-8-yl)butanamide (5g)**

Obtained as a slight yellow solid (40.7 mg, 64%); m.p. 112 – 114 °C; IR (KBr),  $\text{cm}^{-1}$ : 3336, 2960, 2923, 2851, 2150, 1686, 1564, 1515, 1477, 1380, 1361, 1316, 1179, 1149, 1086, 842, 790, 750;  $^1\text{H}$  NMR (300 MHz,  $\text{CDCl}_3$ )  $\delta$  9.95 (s, 1H), 8.90 (dd,  $J = 4.2, 1.5$  Hz, 1H), 8.81 (d,  $J = 8.2$  Hz, 1H), 8.65 (dd,  $J = 8.5, 1.5$  Hz, 1H), 8.08 (d,  $J = 8.2$  Hz, 1H), 7.69 (dd,  $J = 8.5, 4.2$  Hz, 1H), 2.58 (t,  $J = 7.5$  Hz, 2H), 1.93 – 1.80 (m, 2H), 1.07 (t,  $J = 7.4$  Hz, 3H);  $^{13}\text{C}$  NMR (75 MHz,  $\text{CDCl}_3$ )  $\delta$  171.95, 148.73, 138.77, 137.96, 137.86, 135.90, 128.88, 123.32, 116.02, 111.14, 100.88, 39.98, 18.83, 13.67; HRMS (ESI) calculated for  $\text{C}_{14}\text{H}_{14}\text{N}_3\text{OSe}$   $[\text{M}+\text{H}]^+$  320.0297, found 320.0302.

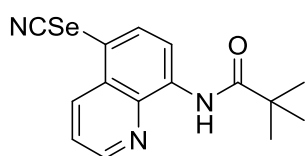

***N*-(quinolin-5-selenocyanate-8-yl)pivalamide (5h)**

Obtained as a slight yellow solid (40.5 mg, 61%); m.p. 110 – 112 °C; IR (KBr),  $\text{cm}^{-1}$ : 3361, 3344, 2960, 2920, 2850, 2149, 1675, 1647, 1515, 1480, 1448, 1395, 1361, 1315, 1173, 1141, 933, 851, 839, 789, 682;  $^1\text{H}$  NMR (300 MHz,  $\text{CDCl}_3$ )  $\delta$  10.39 (s, 1H), 8.90 (dd,  $J = 4.1, 1.3$  Hz, 1H), 8.79 (d,  $J = 8.2$  Hz, 1H), 8.63 (dd,  $J = 8.5, 1.3$  Hz, 1H), 8.05 (d,  $J = 8.2$  Hz, 1H), 7.67 (dd,  $J = 8.5, 4.2$  Hz, 1H), 1.43 (s, 9H);  $^{13}\text{C}$  NMR (75 MHz,  $\text{CDCl}_3$ )  $\delta$  177.56, 148.93, 139.38, 138.29, 138.05, 136.02, 129.02, 123.38, 116.01, 111.09, 100.88, 27.57 ( $\times 3$ ); HRMS (ESI) calculated for  $\text{C}_{15}\text{H}_{16}\text{N}_3\text{OSe}$   $[\text{M}+\text{H}]^+$  334.0453, found 334.0447.

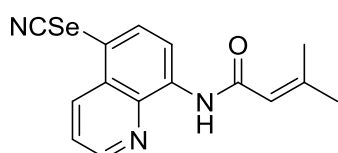

**3-methyl-*N*-(quinolin-5-selenocyanate-8-yl)but-2-enamide (5i)**

Obtained as a slight yellow solid (41.6 mg, 63%); m.p. 178 – 180 °C; IR (KBr),  $\text{cm}^{-1}$ : 3340, 3302, 2920, 2850, 2149, 1681, 1670, 1642, 1526, 1479, 1369, 1317, 1161, 1143, 847, 832, 790, 663;  $^1\text{H}$

NMR (300 MHz, CDCl<sub>3</sub>)  $\delta$  9.87 (s, 1H), 8.91 – 8.79 (m, 2H), 8.64 (dd,  $J$  = 8.5, 1.5 Hz, 1H), 8.06 (d,  $J$  = 8.3 Hz, 1H), 7.67 (dd,  $J$  = 8.5, 4.2 Hz, 1H), 5.99 (d,  $J$  = 1.2 Hz, 1H), 2.30 (d,  $J$  = 0.9 Hz, 3H), 1.98 (d,  $J$  = 0.9 Hz, 3H); <sup>13</sup>C NMR (75 MHz, CDCl<sub>3</sub>)  $\delta$  165.33, 155.22, 148.70, 139.05, 138.69, 138.15, 136.07, 129.11, 123.40, 118.81, 115.90, 110.78, 100.94, 27.60, 20.13; HRMS (ESI) calculated for C<sub>15</sub>H<sub>14</sub>N<sub>3</sub>OSe [M+H]<sup>+</sup> 332.0297, found 334.0307.

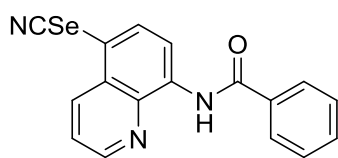

#### N-(quinolin-5-selenocyanate-8-yl)benzamide (5j)

Obtained as a slight yellow solid (41.6 mg, 63%); m.p. 194 – 196 °C; IR (KBr), cm<sup>-1</sup>: 3364, 2921, 2851, 2150, 1669, 1581, 1531, 1480, 1382, 1367, 1363, 1324, 1261, 851, 790, 701 688, 643; <sup>1</sup>H NMR (300 MHz, CDCl<sub>3</sub>)  $\delta$  10.89 (s, 1H), 8.99 – 8.93 (m, 2H), 8.69 (dd,  $J$  = 8.5, 1.5 Hz, 1H), 8.15 (d,  $J$  = 8.2 Hz, 1H), 8.12 – 8.06 (m, 2H), 7.72 (dd,  $J$  = 8.5, 4.2 Hz, 1H), 7.67 – 7.54 (m, 3H); <sup>13</sup>C NMR (75 MHz, CDCl<sub>3</sub>)  $\delta$  165.51, 149.00, 139.31, 138.10, 137.98, 136.09, 134.35, 132.30, 129.06, 128.90 ( $\times$ 2), 127.31 ( $\times$ 2), 123.53, 116.29, 111.64, 100.86; HRMS (ESI) calculated for C<sub>17</sub>H<sub>12</sub>N<sub>3</sub>OSe [M+H]<sup>+</sup> 354.0140, found 354.0138.

### Synthetic Applications of 3a

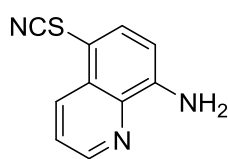

**Quinolin-5-selenocyanate-8-amine (6)<sup>1d</sup>** To a solution of **3a** (0.2 mmol) in EtOH (2 mL), 0.5 mL of concentrated hydrochloric acid (10 M) was added. The mixture was refluxed for 1 h and then concentrated under reduced pressure. The residue was dissolved in CH<sub>2</sub>Cl<sub>2</sub> (10.0 mL), washed by saturated NaHCO<sub>3</sub> aqueous solution (5 mL  $\times$  2), brine (5  $\times$  2 mL), and dried over Na<sub>2</sub>SO<sub>4</sub>. The organic solvent was removed under reduced pressure and the residue was purified by flash chromatography on silica gel using *PE/EA* = 10 : 1 as an eluent to give the title product as a slight yellow solid (36.6 mg, 91%); m.p. 90 – 91 °C; IR (KBr), cm<sup>-1</sup>: 3474, 3363, 2920, 2851, 2150, 1610, 1591, 1503, 1468, 1363, 1340, 812, 789, 669, 650; <sup>1</sup>H NMR (300 MHz, DMSO-*d*<sub>6</sub>)  $\delta$  8.86 (dd,  $J$  = 4.1, 1.5 Hz, 1H), 8.57 (dd,  $J$  = 8.5, 1.6 Hz, 1H), 7.82 (d,  $J$  = 8.2 Hz, 1H), 7.76 (dd,  $J$  = 8.6, 4.2 Hz, 1H), 6.90 (d,  $J$  = 8.3 Hz, 1H), 6.80 (s, 2H); <sup>13</sup>C NMR (75 MHz, DMSO-*d*<sub>6</sub>)  $\delta$  149.59, 147.57, 137.90, 137.74, 132.82, 129.18, 123.60, 112.65, 108.14, 99.45; HRMS (ESI) calculated for C<sub>10</sub>H<sub>8</sub>N<sub>3</sub>S [M+H]<sup>+</sup> 202.0433, found 202.0438.

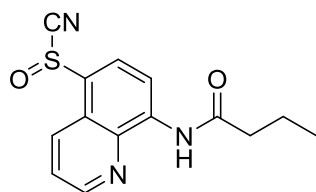

**N-(quinolin-5-sulfinylcyanide-8-yl)butanamide (7)<sup>2</sup>** To a solution of **3a** (0.2 mmol) in CHCl<sub>3</sub> (2 mL), 99 mg (70%, 0.6 mmol) of metachloroperbenzoic acid was added. The mixture was refluxed for 6 h, then diluted with 10 mL of CHCl<sub>3</sub>, washed by saturated NaHCO<sub>3</sub> aqueous solution (5 mL  $\times$  2), brine (5 mL  $\times$  2), and dried over Na<sub>2</sub>SO<sub>4</sub>. The organic solvent was removed under reduced pressure and the residue was purified by flash chromatography on silica gel using *PE/EA* = 8:1 as an eluent to give the title product as a slight yellow solid (47.0 mg, 86%); m.p. 154 – 156 °C; IR (KBr), cm<sup>-1</sup>: 3359, 2958, 2921, 2851, 2153, 1687, 1584, 1531, 1494, 1395, 1331, 1260, 1196, 1151, 857, 807, 752; <sup>1</sup>H NMR (300 MHz, CDCl<sub>3</sub>)  $\delta$  14.37 (s, 1H), 9.15 (d,  $J$  = 8.7 Hz, 1H), 8.48 (dd,  $J$  = 6.1, 0.9 Hz, 1H), 8.35 (dd,  $J$  = 8.8, 0.9 Hz, 1H), 8.02 (d,  $J$  = 8.7 Hz, 1H), 7.53 (dd,  $J$  = 8.8, 6.1 Hz, 1H), 2.49 (t,  $J$  = 7.5 Hz, 2H), 1.89 – 1.75 (m, 2H), 1.03 (t,  $J$  = 7.4 Hz, 3H); <sup>13</sup>C NMR (75 MHz, CDCl<sub>3</sub>)  $\delta$  172.57,

138.37, 138.27, 138.02, 132.63, 132.06, 125.58, 122.46, 118.16, 111.90, 109.75, 40.97, 18.74, 13.67; HRMS (ESI) calculated for C<sub>14</sub>H<sub>14</sub>N<sub>3</sub>O<sub>2</sub>S [M+H]<sup>+</sup> 288.0801, found 288.0803.

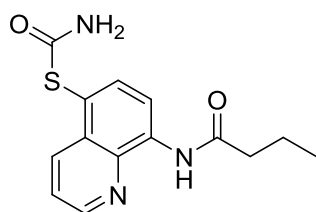

***N*-(quinolin-5-thiocarbamate-8-yl)butanamide (8)**<sup>3</sup> To a solution of **3a** (0.2 mmol) in CH<sub>2</sub>Cl<sub>2</sub> (2 mL), 0.1 mL of concentrated sulfuric acid (18 M) was added. The mixture was stirred under the ice bath condition for 4 h, then diluted with 10 mL of CH<sub>2</sub>Cl<sub>2</sub>, washed by saturated NaHCO<sub>3</sub> aqueous solution (5 mL × 3), brine (5 mL × 2), and dried over Na<sub>2</sub>SO<sub>4</sub>. The organic solvent was removed under reduced pressure and the residue was purified by flash chromatography on silica gel using *PE/EA* = 1 : 1 as an eluent to obtain the title product as a slight yellow solid (47.5 mg, 82%); m.p. 154 – 155 °C; IR (KBr), cm<sup>-1</sup>: 3374, 3325, 3253, 3191, 2960, 2923, 2845, 2359, 2343, 1659, 1614, 1530, 1481, 1384, 1321, 1149, 846, 792, 726, 619, 597; <sup>1</sup>H NMR (300 MHz, DMSO-*d*<sub>6</sub>) δ 10.21 (s, 1H), 8.98 (dd, *J* = 4.2, 1.5 Hz, 1H), 8.66 (d, *J* = 8.1 Hz, 1H), 8.58 (dd, *J* = 8.5, 1.5 Hz, 1H), 7.92 (brs, 1H), 7.82 (d, *J* = 8.1 Hz, 1H), 7.75 (dd, *J* = 8.5, 1.6 Hz, 1H), 7.60 (brs, 1H), 2.59 (t, *J* = 7.3 Hz, 2H), 1.75 – 1.62 (m, 2H), 0.95 (t, *J* = 7.4 Hz, 3H); <sup>13</sup>C NMR (75 MHz, DMSO-*d*<sub>6</sub>) δ 171.94, 165.03, 148.82, 138.48, 136.84, 136.50, 134.76, 129.93, 122.86, 119.21, 115.86, 38.66, 18.64, 13.60; HRMS (ESI) calculated for C<sub>14</sub>H<sub>16</sub>N<sub>3</sub>O<sub>2</sub>S [M+H]<sup>+</sup> 290.0958, found 290.0960.

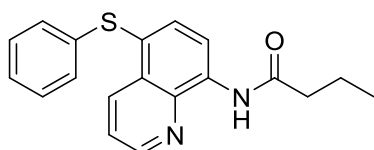

***N*-(quinolin-5-phenylthio-8-yl)butanamide (9)**<sup>4</sup> To a solution of **3a** (0.2 mmol) in H<sub>2</sub>O (2 mL), iodobenzene (2.0 mmol), CuI (10 mol %), 1,10-phenanthroline (10 mol %), TBAB (10 mol %), NaHCO<sub>3</sub> (0.4 mmol) were added. The reaction mixture was placed in an oil bath at 100 °C and vigorously stirred for 10 h. Afterward it was cooled to ambient temperature, diluted with 10 mL of CH<sub>2</sub>Cl<sub>2</sub>, washed brine (5 mL × 2), and dried over Na<sub>2</sub>SO<sub>4</sub>. The organic solvent was removed under reduced pressure and the residue was purified by flash chromatography on silica gel using *PE/EA* = 30 : 1 as an eluent to give the title product as a slight yellow solid (46.4 mg, 72%); m.p. 133 – 135 °C; IR (KBr), cm<sup>-1</sup>: 3341, 2958, 2924, 2871, 1689, 1581, 1519, 1477, 1455, 1376, 1362, 1312, 1184, 1147, 1083, 1023, 866, 817, 795, 746, 690; <sup>1</sup>H NMR (300 MHz, CDCl<sub>3</sub>) δ 9.93 (s, 1H), 8.80 (dd, *J* = 4.9, 3.3 Hz, 2H), 8.67 (dd, *J* = 8.5, 1.6 Hz, 1H), 7.87 (d, *J* = 8.1 Hz, 1H), 7.46 (dd, *J* = 8.5, 4.2 Hz, 1H), 7.22–7.02 (m, 5H), 2.57 (t, *J* = 7.5 Hz, 2H), 1.87 (dd, *J* = 14.9, 7.4 Hz, 2H), 1.06 (t, *J* = 7.4 Hz, 3H). <sup>13</sup>C NMR (75 MHz, CDCl<sub>3</sub>) δ 171.88, 148.29, 139.07, 137.78, 136.20, 136.02, 134.93, 129.30, 129.01(×2), 127.38 (×2), 125.71, 122.52, 122.36, 116.20, 40.15, 19.06, 13.79. HRMS (ESI) calculated for C<sub>19</sub>H<sub>19</sub>N<sub>2</sub>O<sub>2</sub>S [M+H]<sup>+</sup> 323.1213, found 323.1214.

## References

- (a) A. M. Suess, M. Z. Ertem, C. J. Cramer and S. S. Stahl, *J. Am. Chem. Soc.*, 2013, **135**, 9797; (b) H. L. Guo, M. M. Chen, P. Jiang, J. Chen, L. X. Pan, M. Wang, C. S. Xie and Y. H. Zhang, *Tetrahedron*, 2015, **71**, 70; (c) J. Xu, X. L. Zhu, G. B. Zhou, B. B. Ying, P. P. Ye, Y. Y. Su, C. Shen and P. F. Zhang, *Org. Biomol. Chem.*, 2016, **14**, 3016; (d) H. W. Liang, K. Jiang, W.

- Ding, Y. Yuan, Li Shuai, Y. C. Chen and Y. Wei, *Chem. Commun.*, 2015, **51**, 16928; (e) Q. H. Zhu, D. Z. Ji, T. T. Liang, X. Y. Wang, Y. G. Wang, *Org. Lett.*, 2015, **17**, 3798.
- M. A. Boerma-Markerink, J. C. Jagt, H. Meyer, J. Wildeman and A. M. Van Leusen, *Synth. Commun.*, 1975, **5**, 147.
  - R. Riemschneider, F. Wojahn and G. Orlick, *J. Am. Chem. Soc.*, 1951, **73**, 5905.
  - F. Ke, Y. Y. Qu, Z. Q. Jiang, Z. K. Li, D. Wu and X. G. Zhou, *Org. Lett.*, 2011, **13**, 454.

## Single-crystal X-ray data for compound 3a

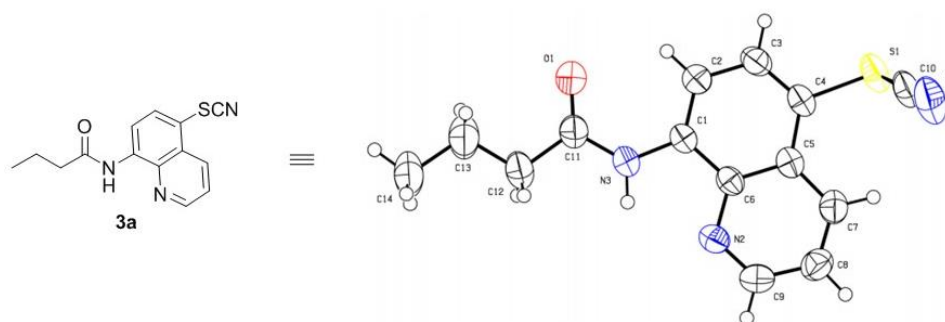

Bond precision: C-C = 0.0033 Å

Wavelength=0.71073

Cell: a=7.680 (5) b=8.494 (5) c=11.449 (7)  
 alpha=85.960 (7) beta=77.314 (7) gamma=66.467 (7)  
 Temperature: 296 K

|                        | Calculated     | Reported       |
|------------------------|----------------|----------------|
| Volume                 | 667.9 (7)      | 667.9 (7)      |
| Space group            | P -1           | P -1           |
| Hall group             | -P 1           | -P 1           |
| Moiety formula         | C14 H13 N3 O S | ?              |
| Sum formula            | C14 H13 N3 O S | C14 H13 N3 O S |
| Mr                     | 271.33         | 271.33         |
| Dx, g cm <sup>-3</sup> | 1.349          | 1.349          |
| Z                      | 2              | 2              |
| Mu (mm <sup>-1</sup> ) | 0.237          | 0.237          |
| F000                   | 284.0          | 284.0          |
| F000'                  | 284.34         |                |
| h, k, lmax             | 9, 10, 14      | 9, 10, 14      |
| Nref                   | 2861           | 2544           |
| Tmin, Tmax             | 0.977, 0.986   |                |
| Tmin'                  | 0.977          |                |

Correction method= Not given

Data completeness= 0.889

Theta (max)= 26.766

R(reflections)= 0.0458 ( 1906)

wR2(reflections)= 0.1661 ( 2544)

S = 0.986

Npar= 174

# Copies of $^1\text{H}$ and $^{13}\text{C}$ NMR spectra for the title compounds

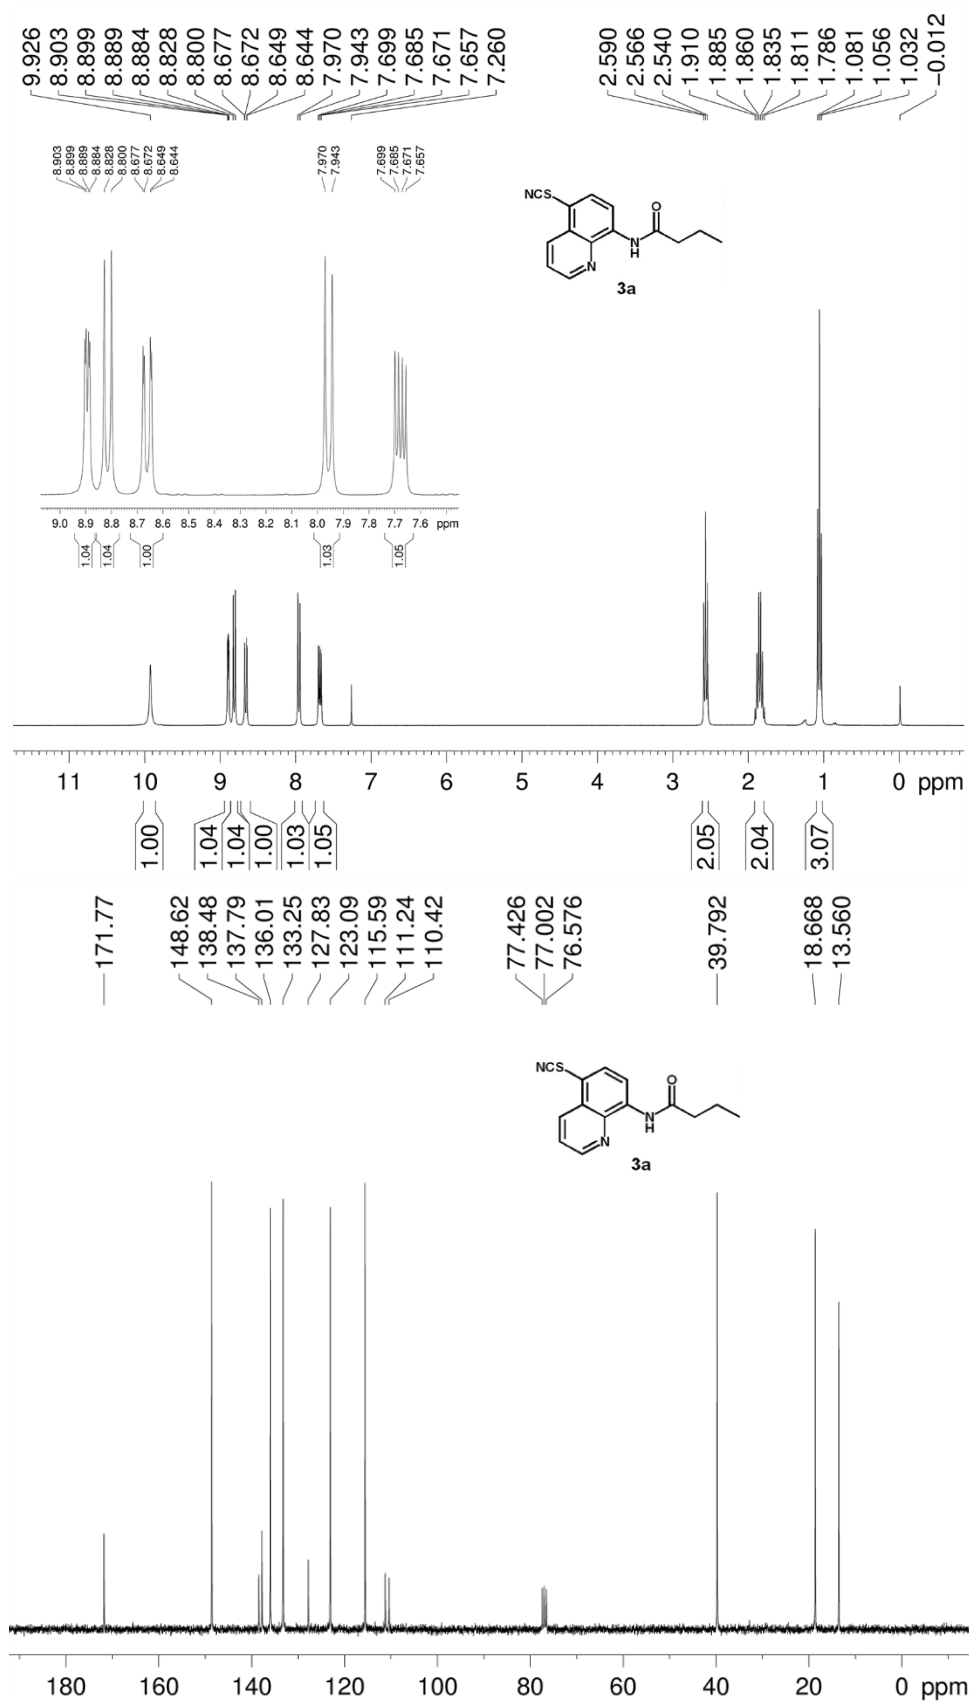

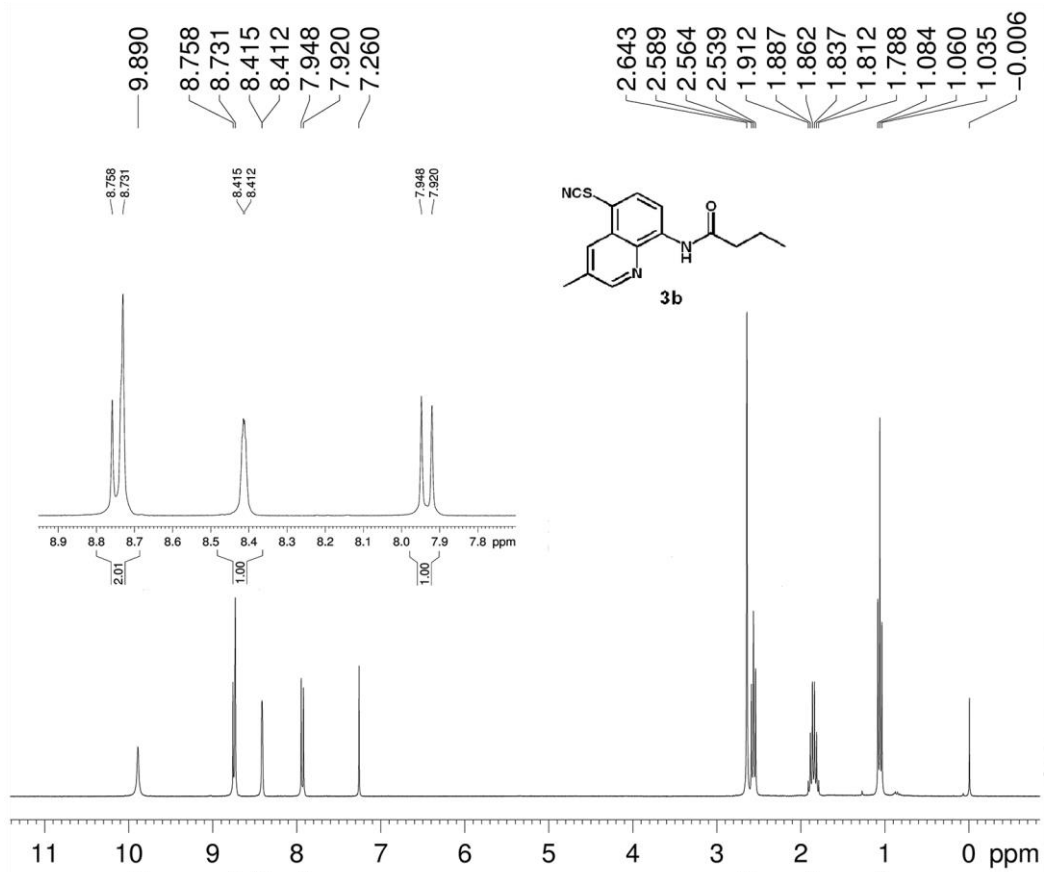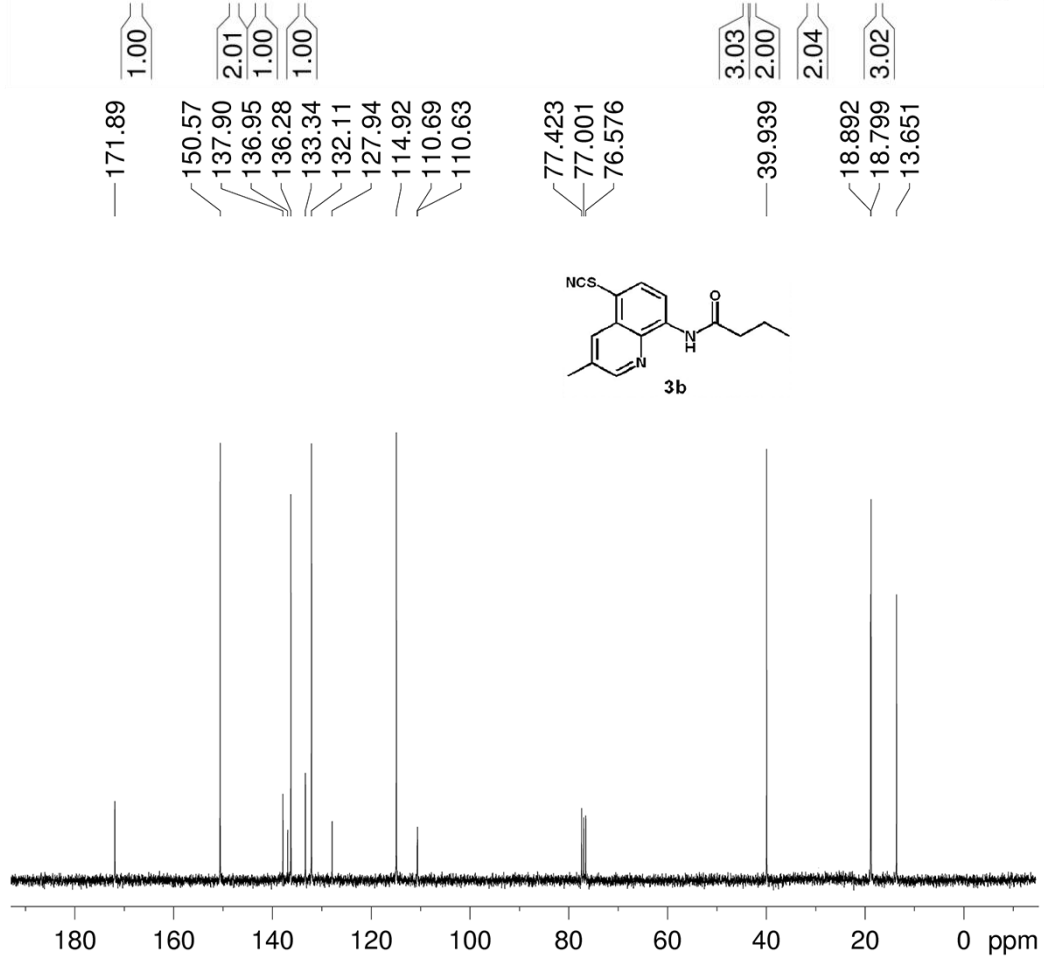



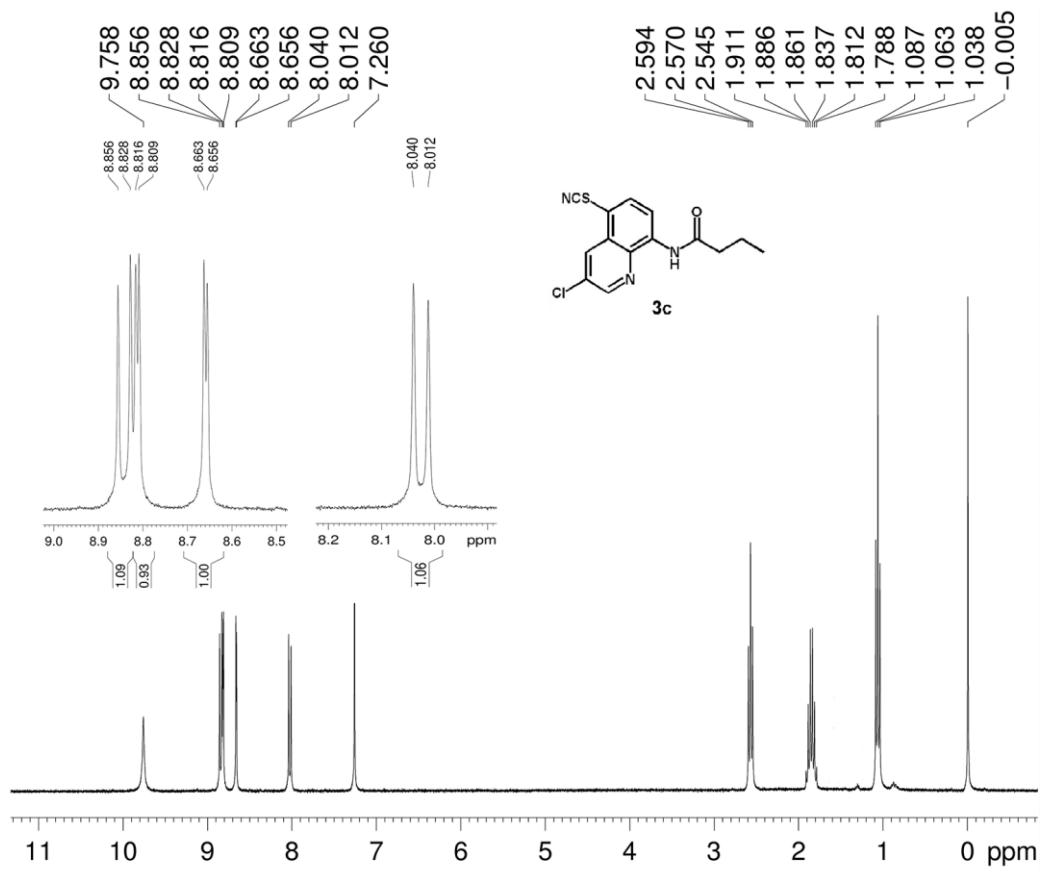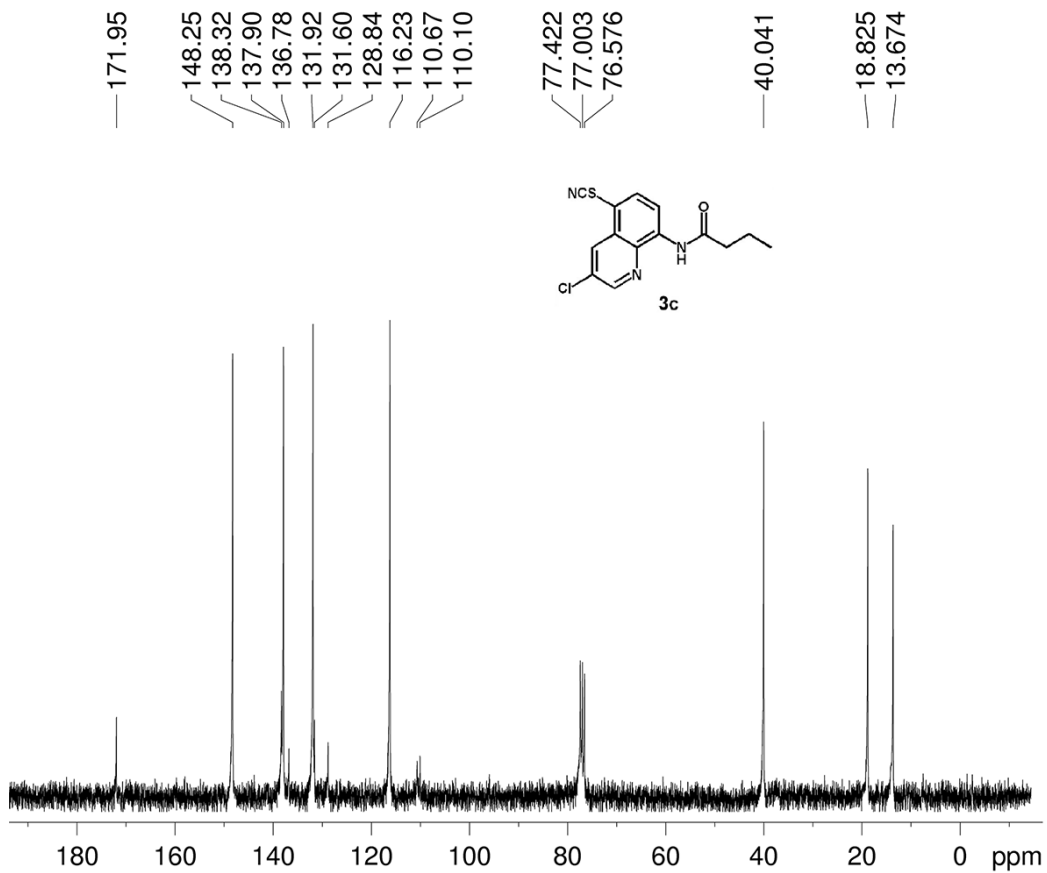

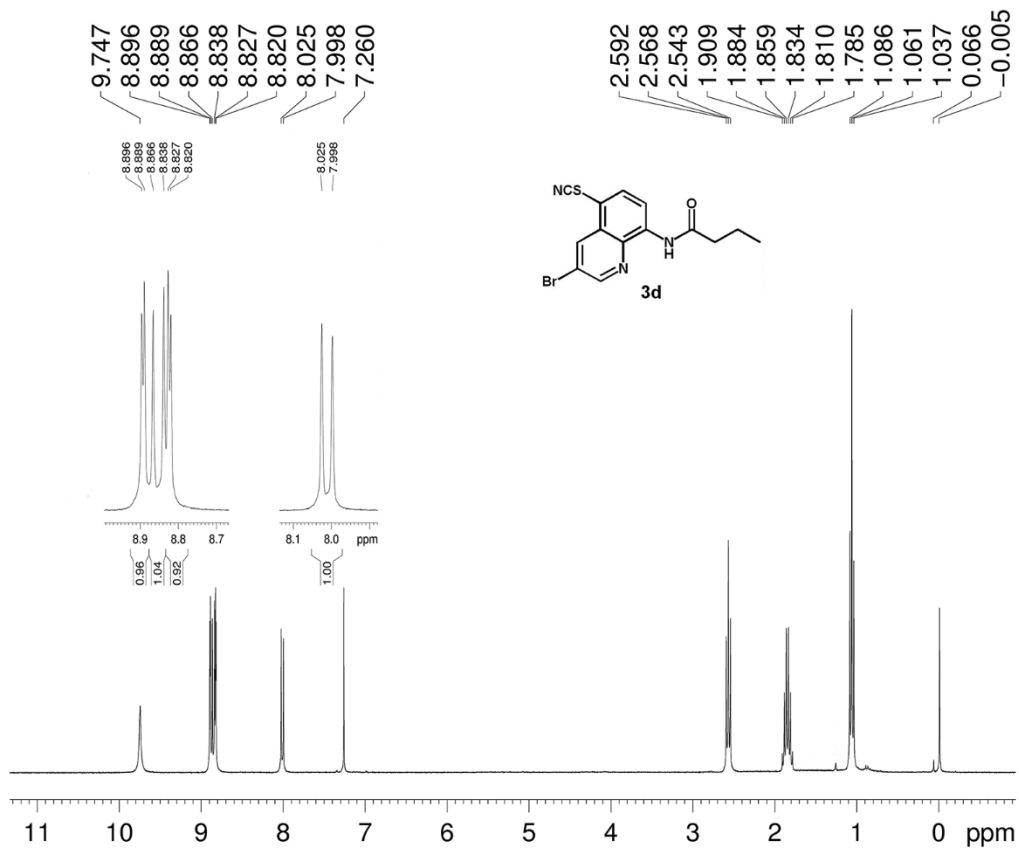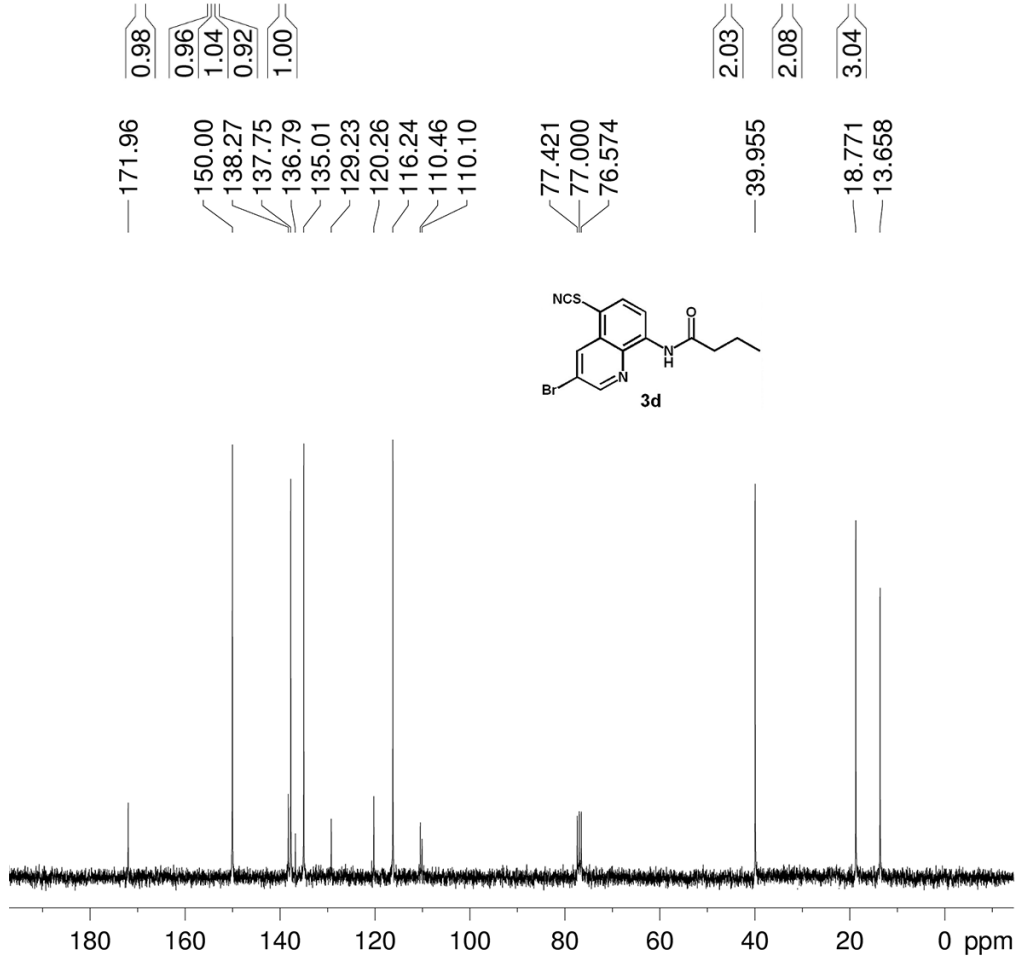

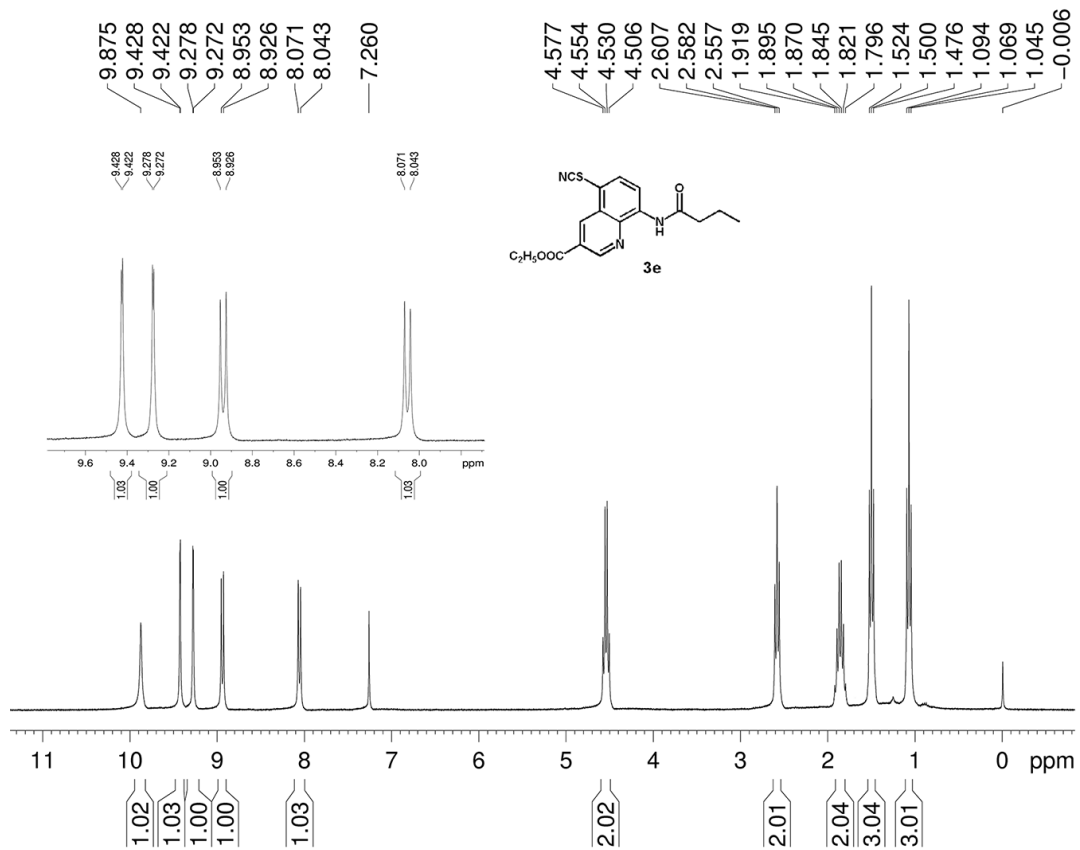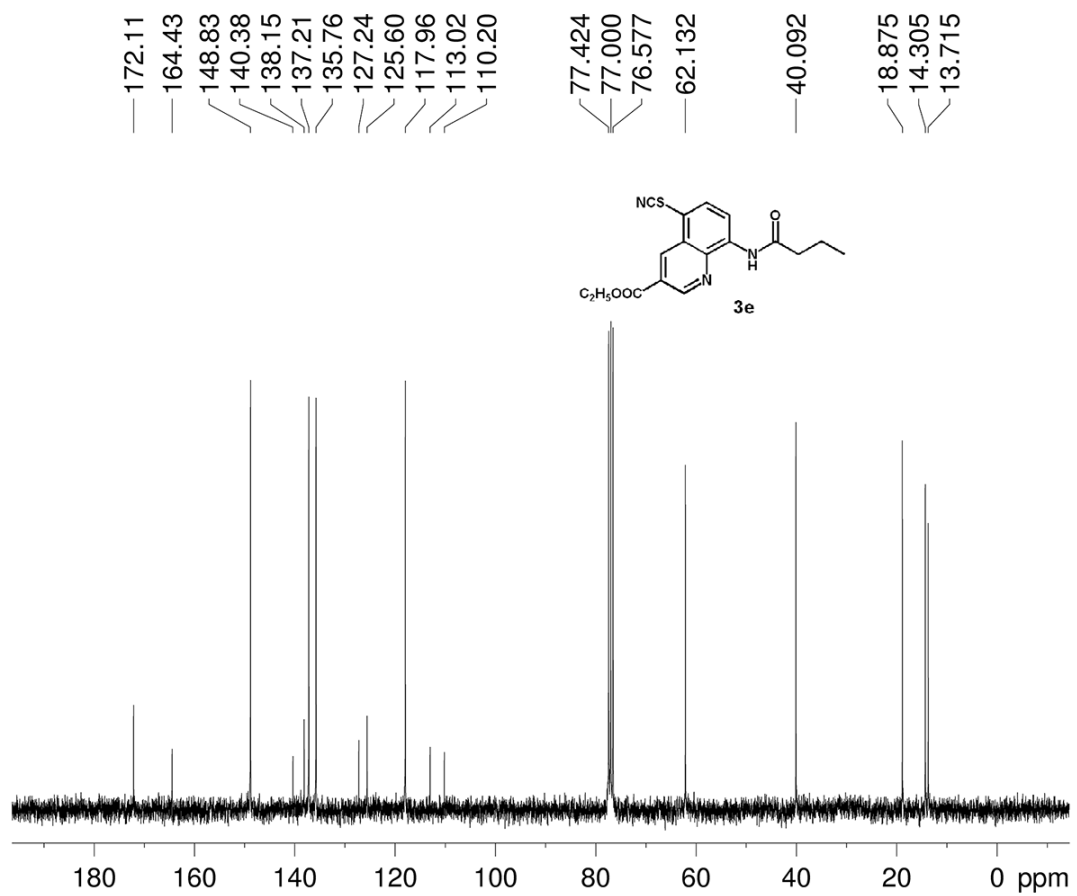

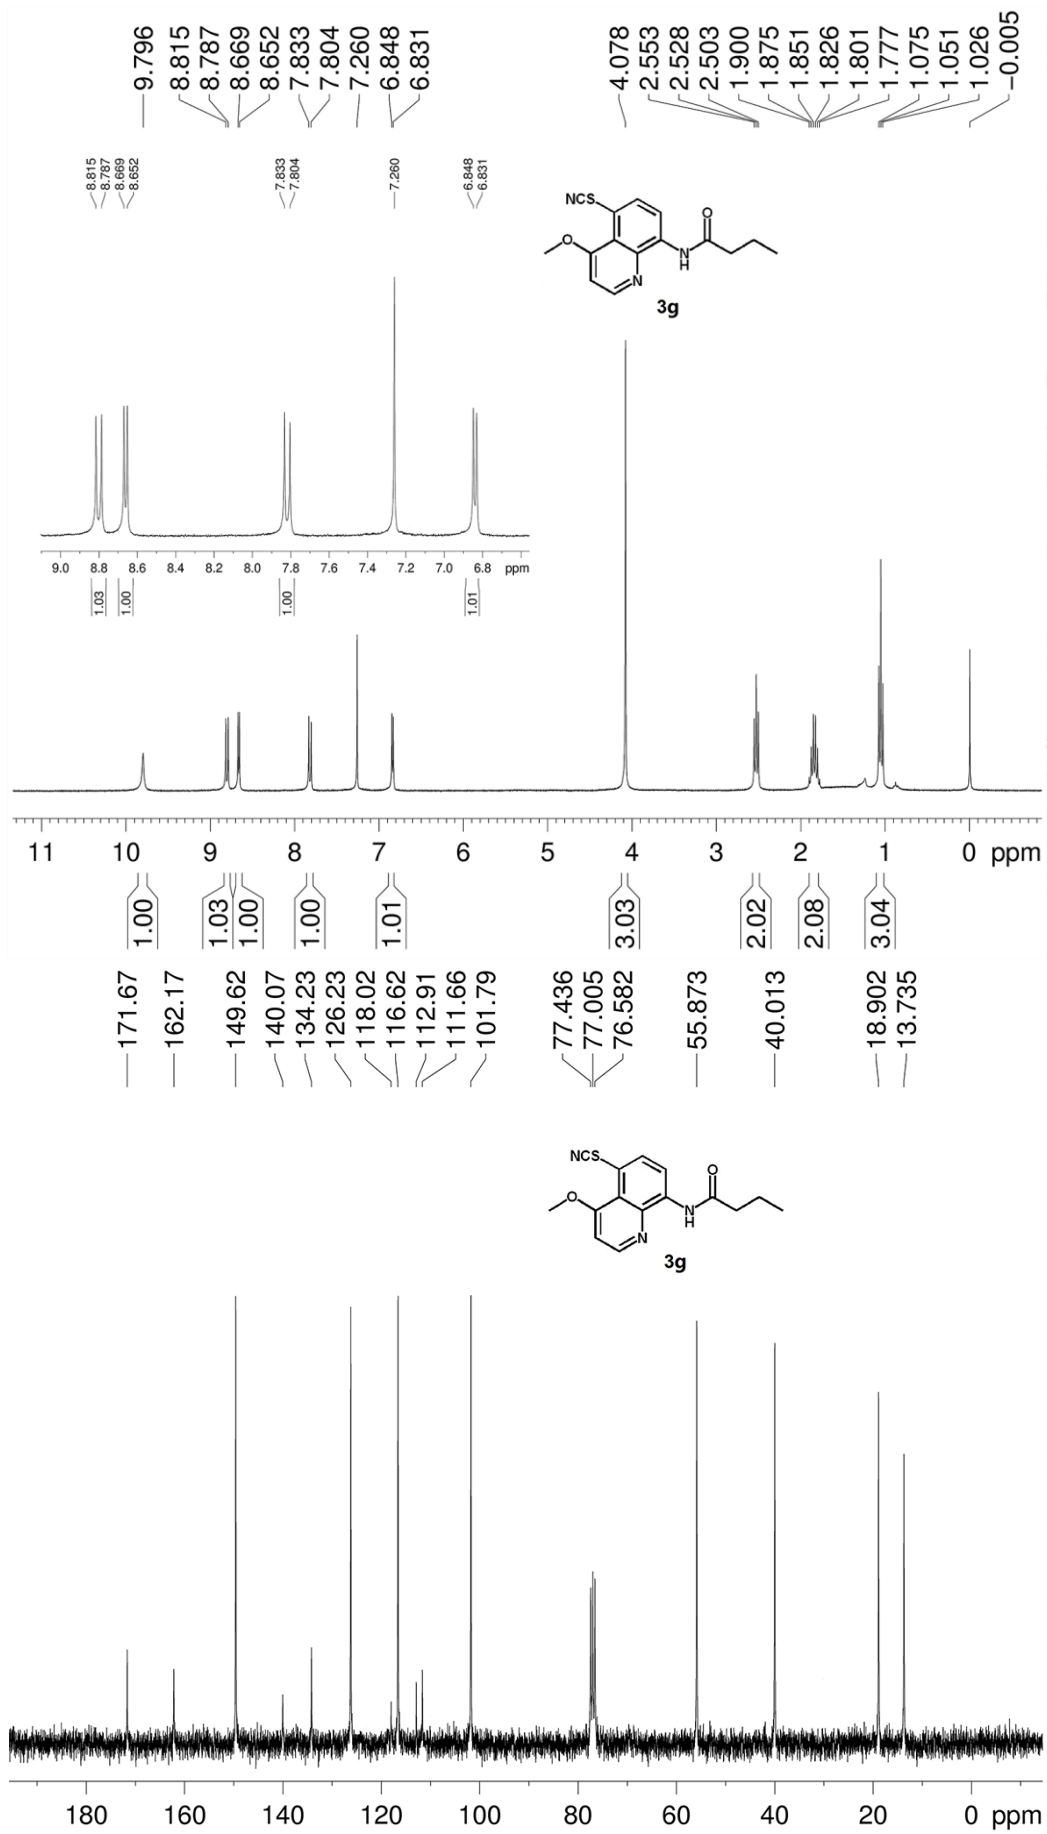

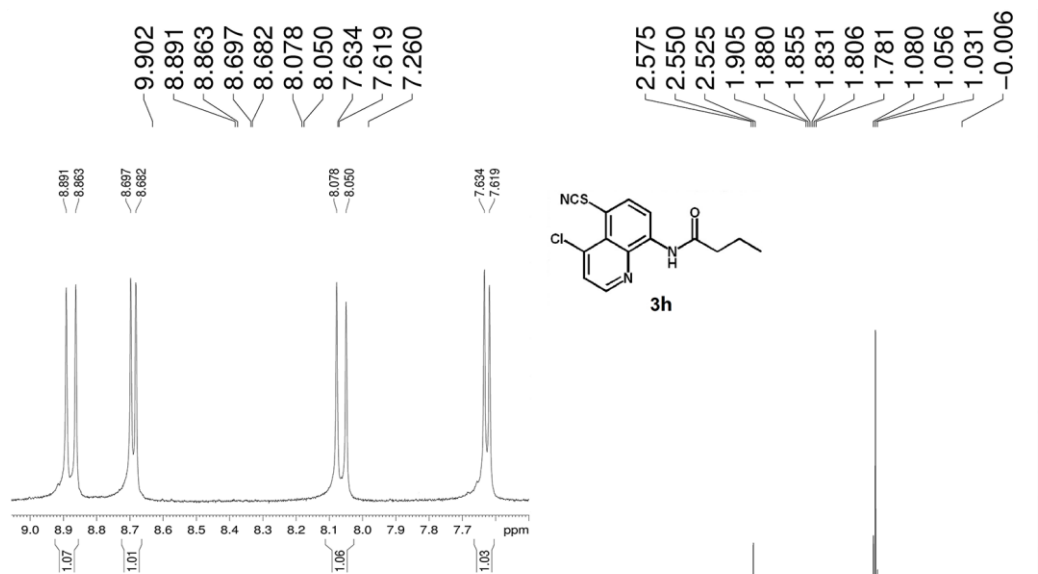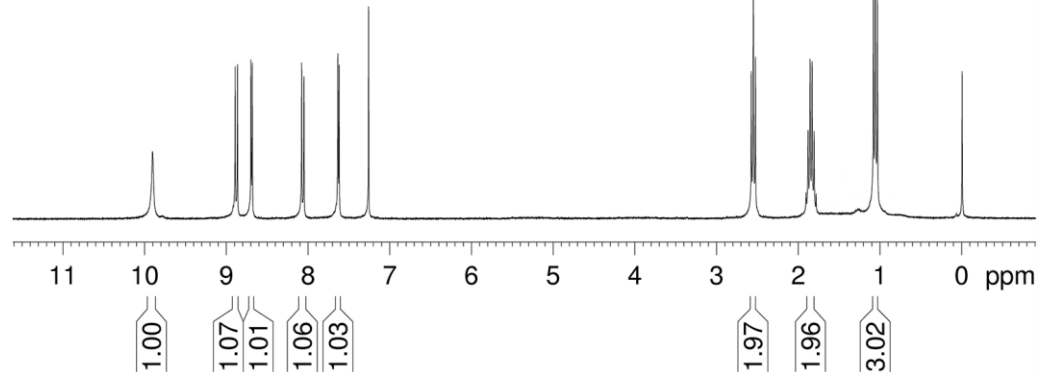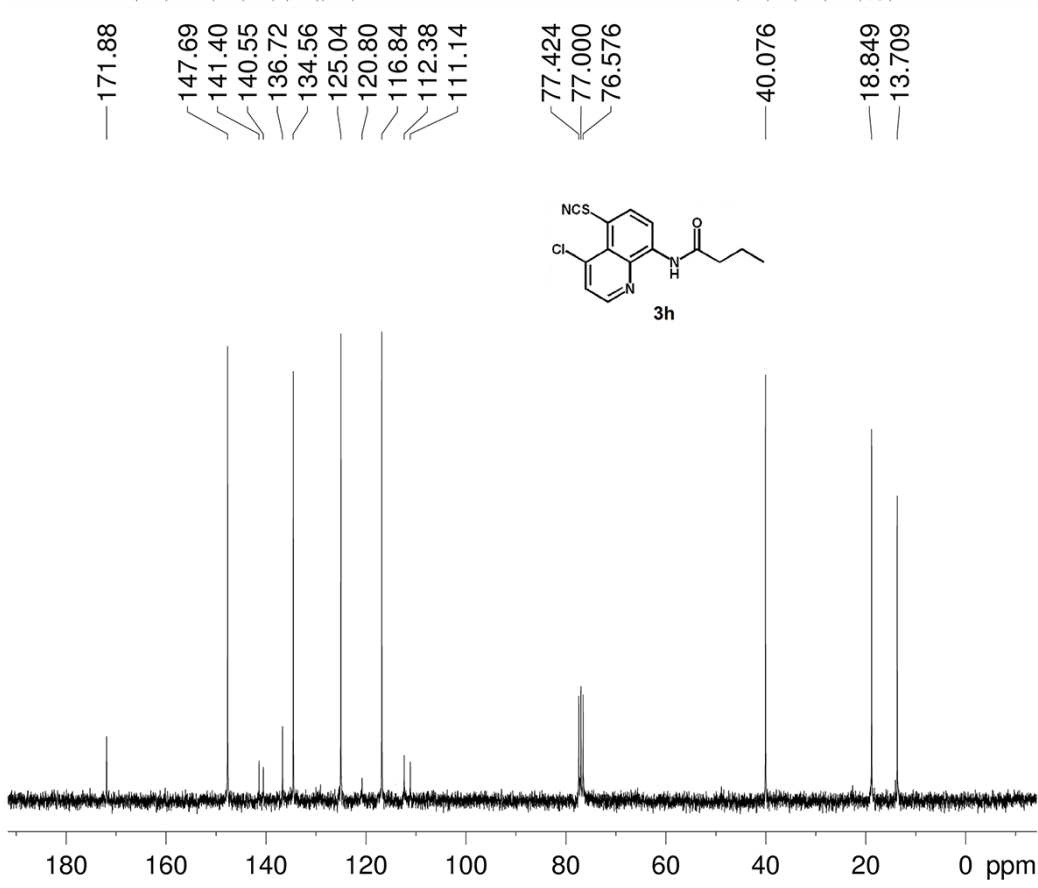

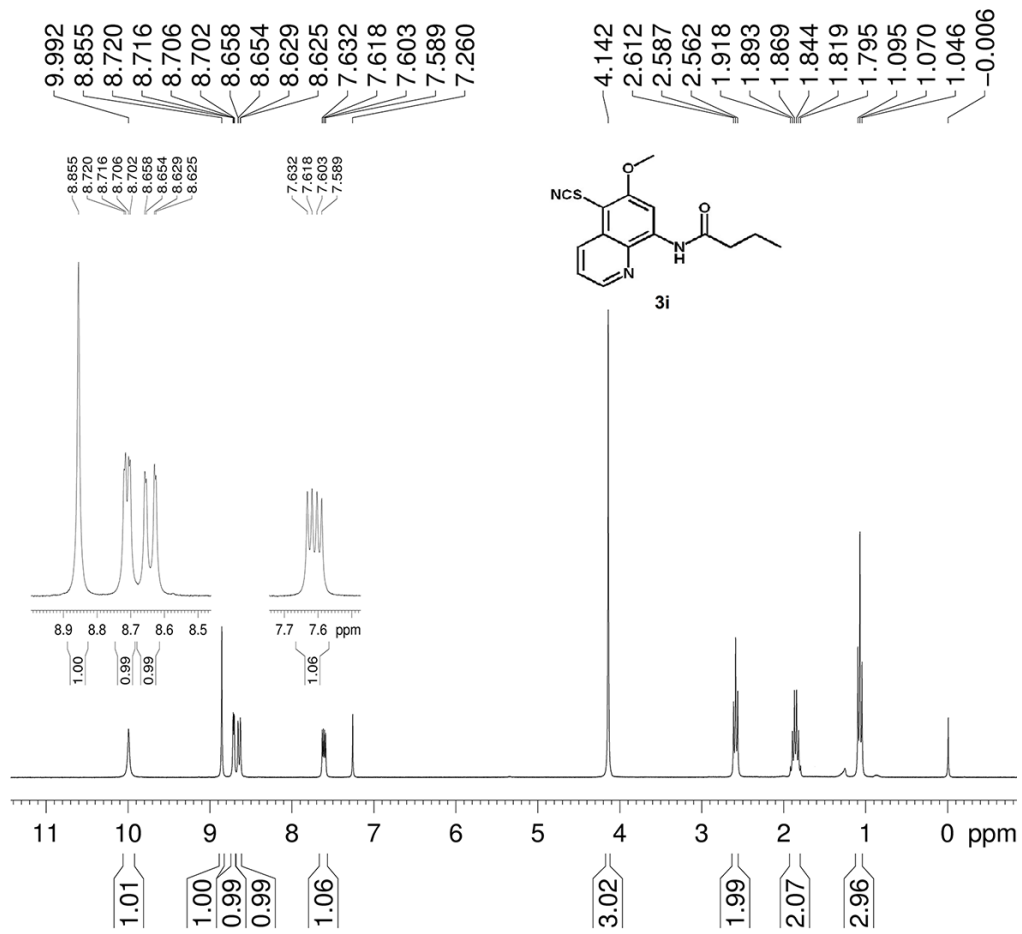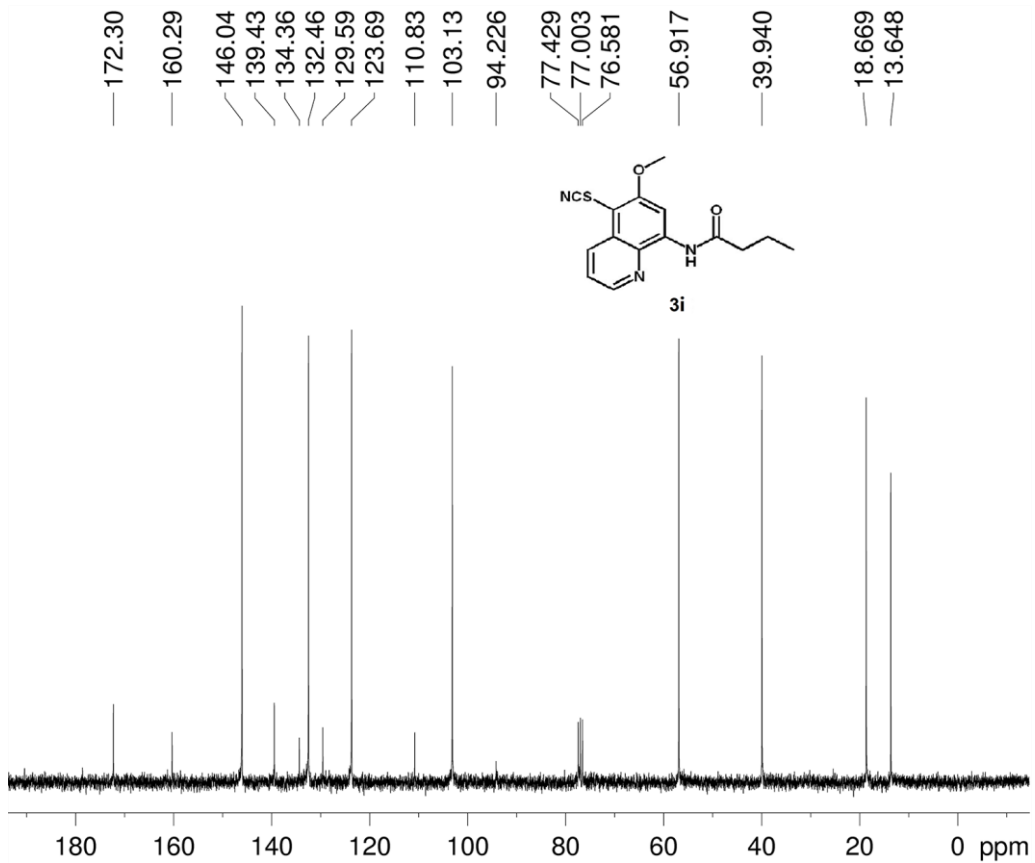

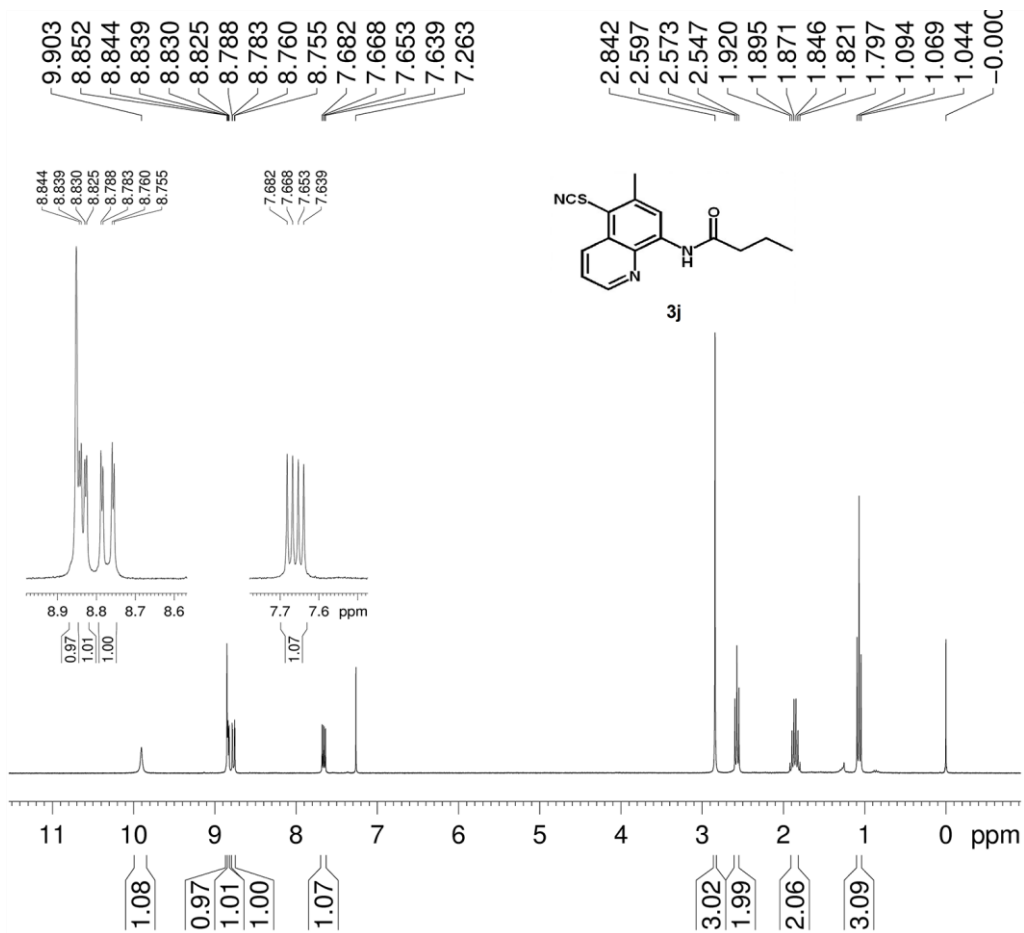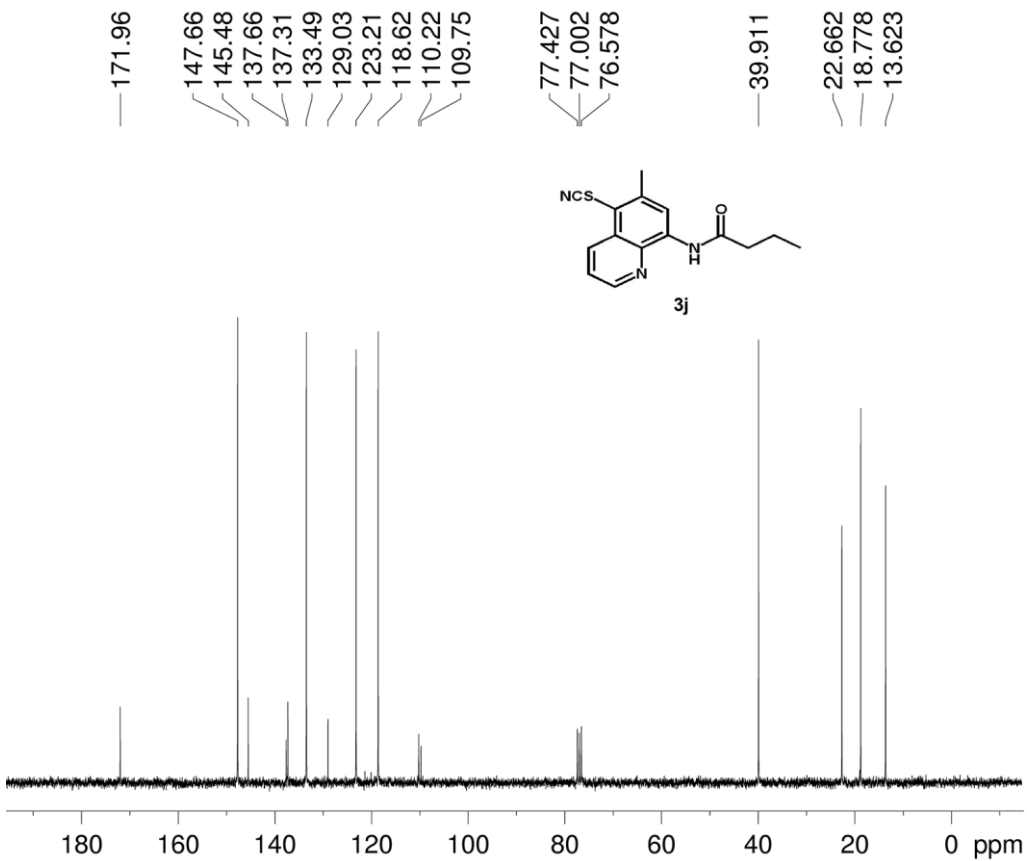

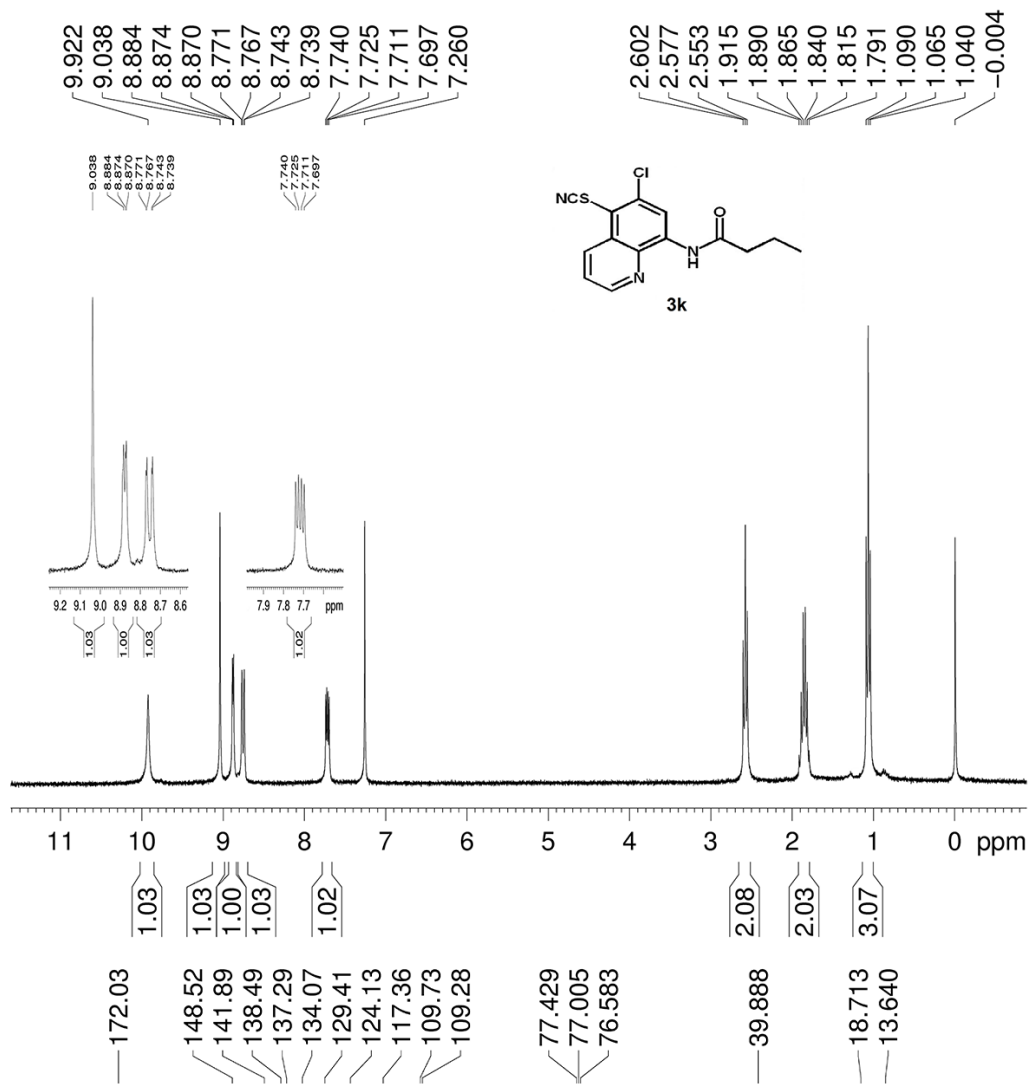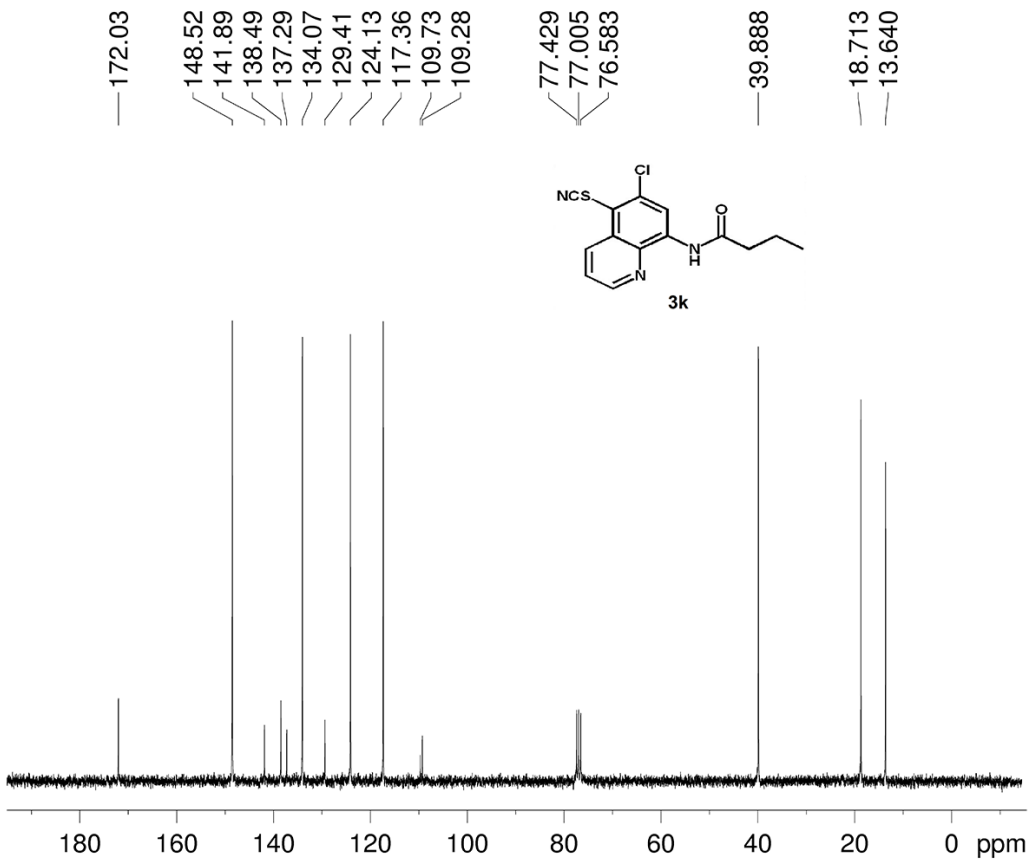



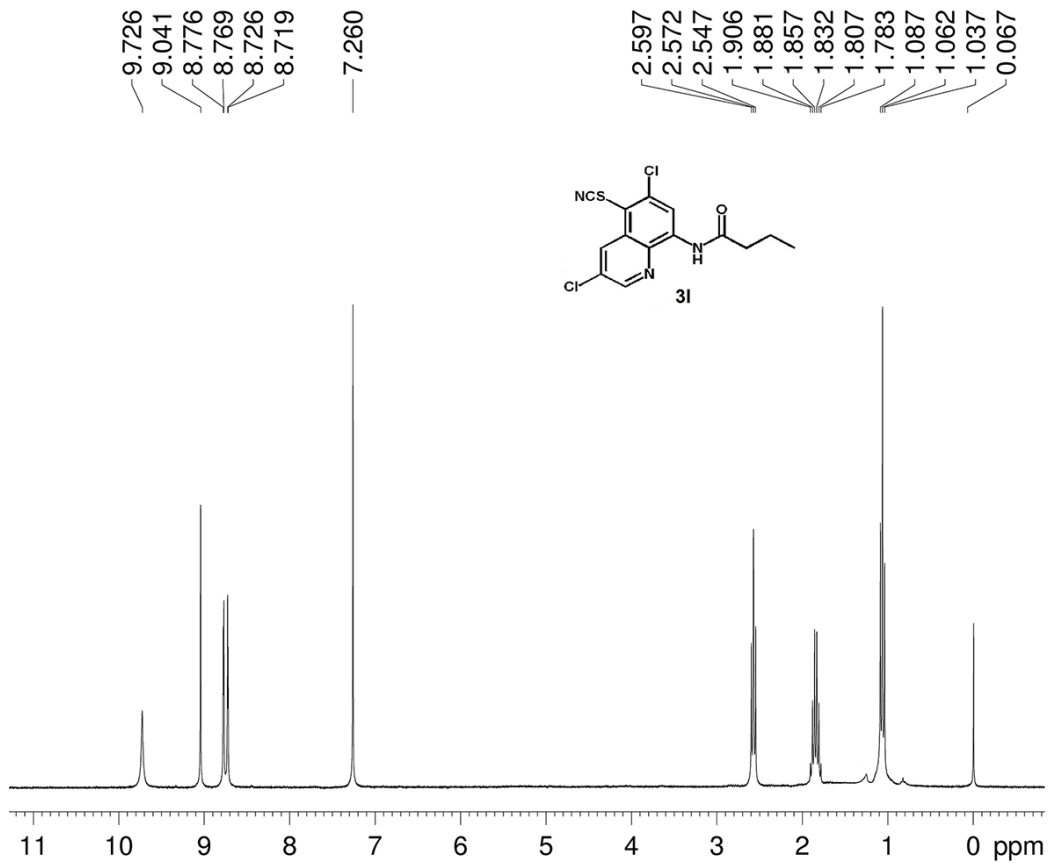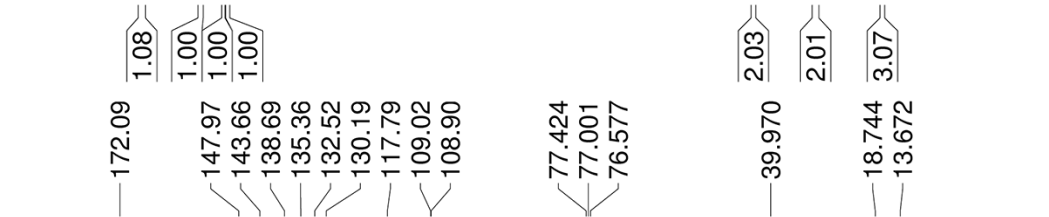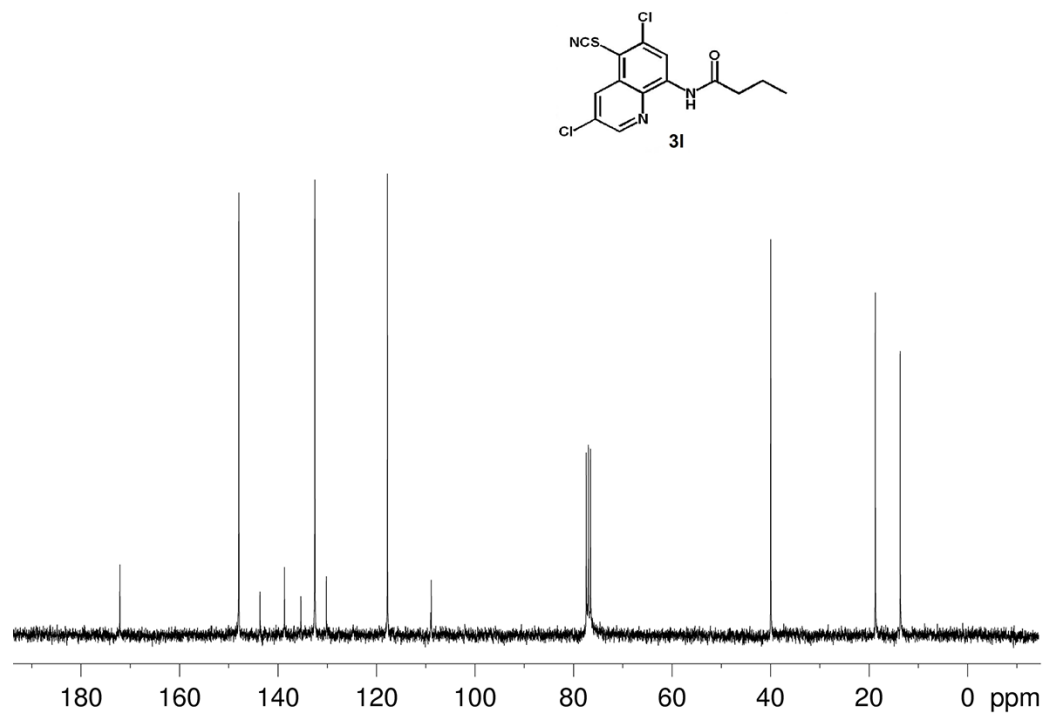

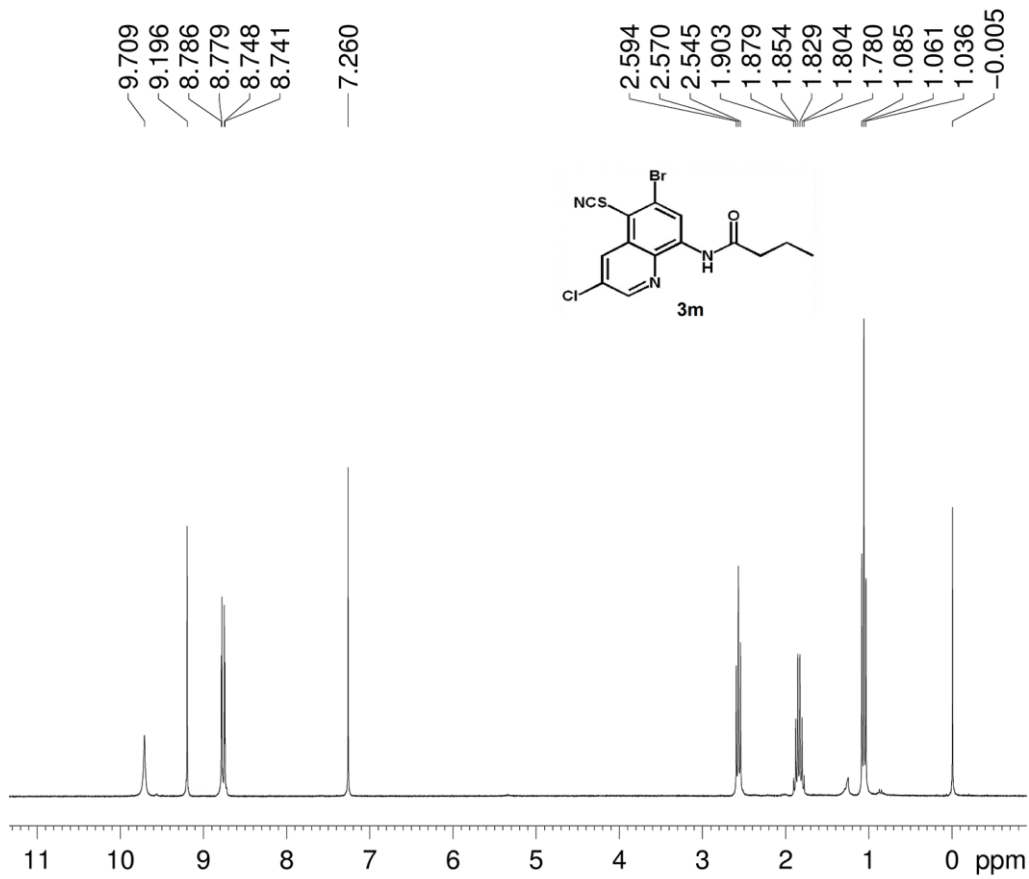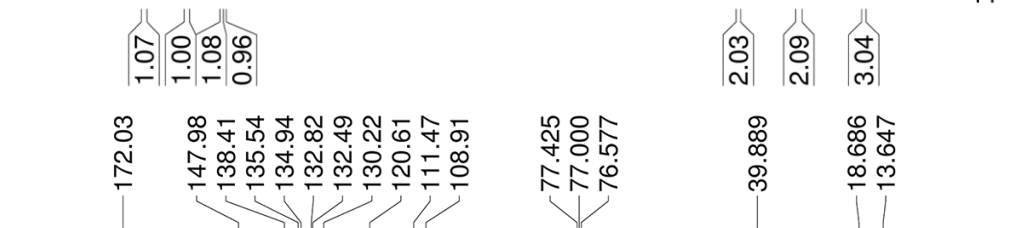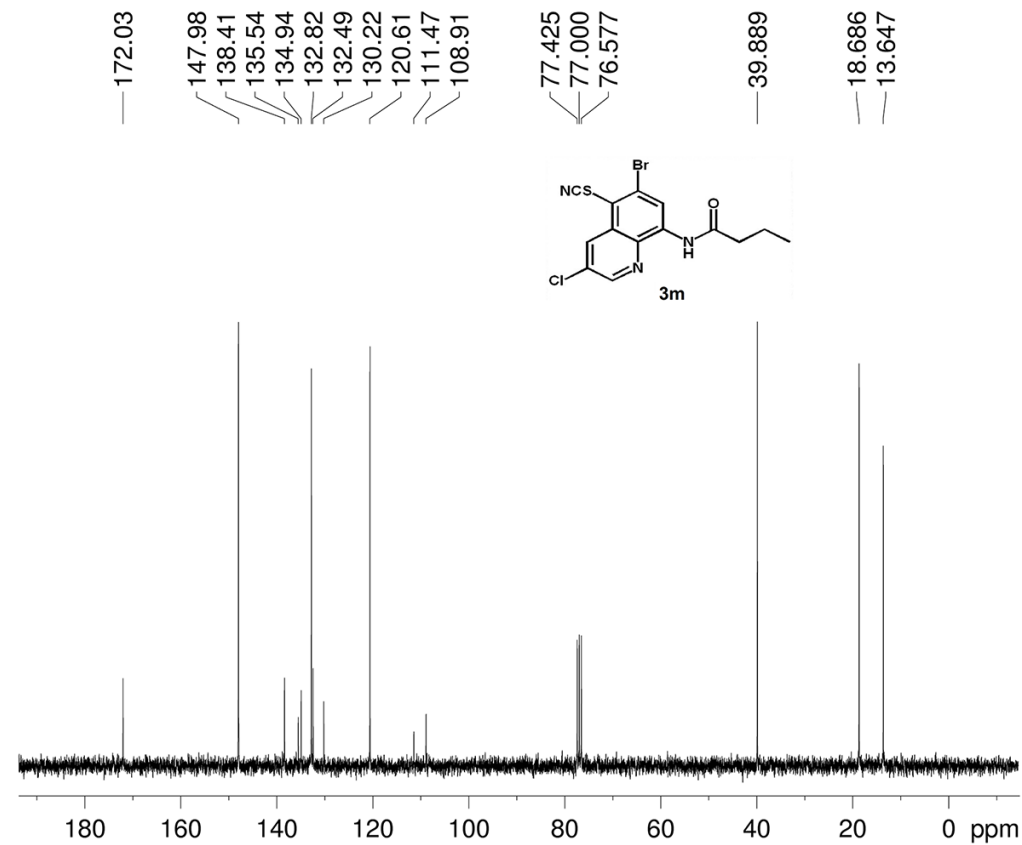

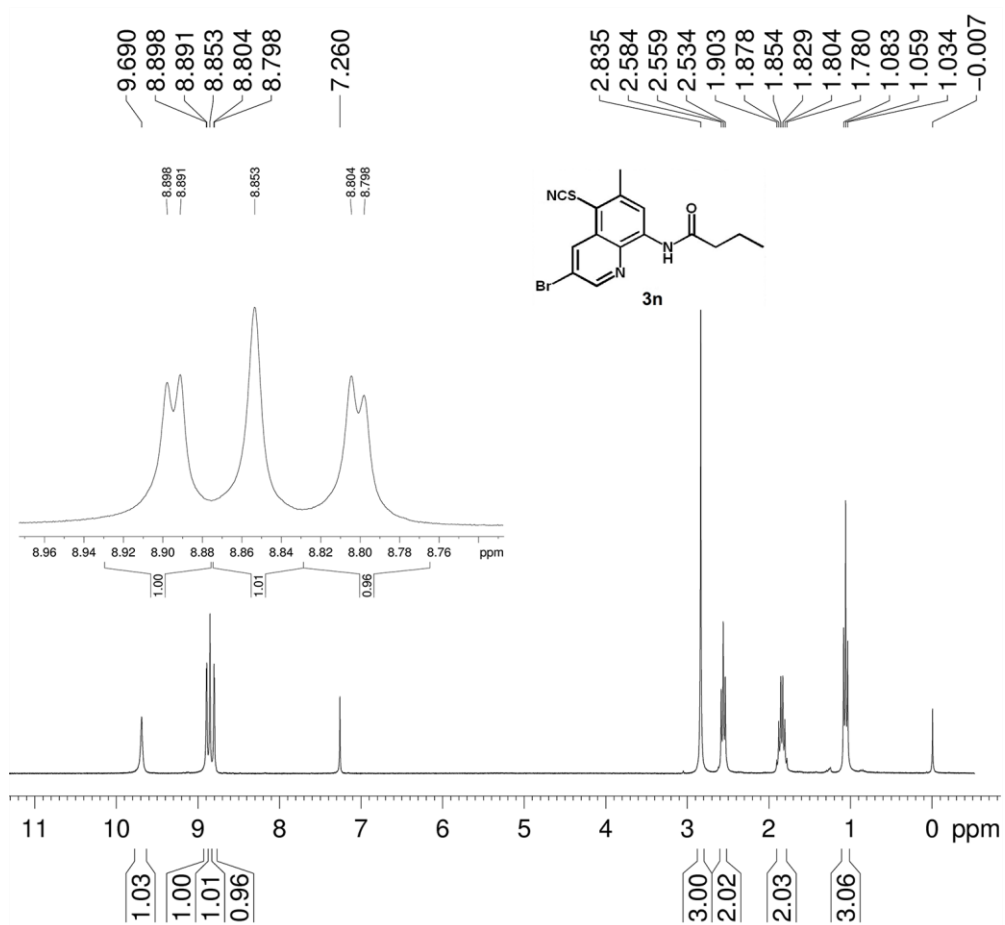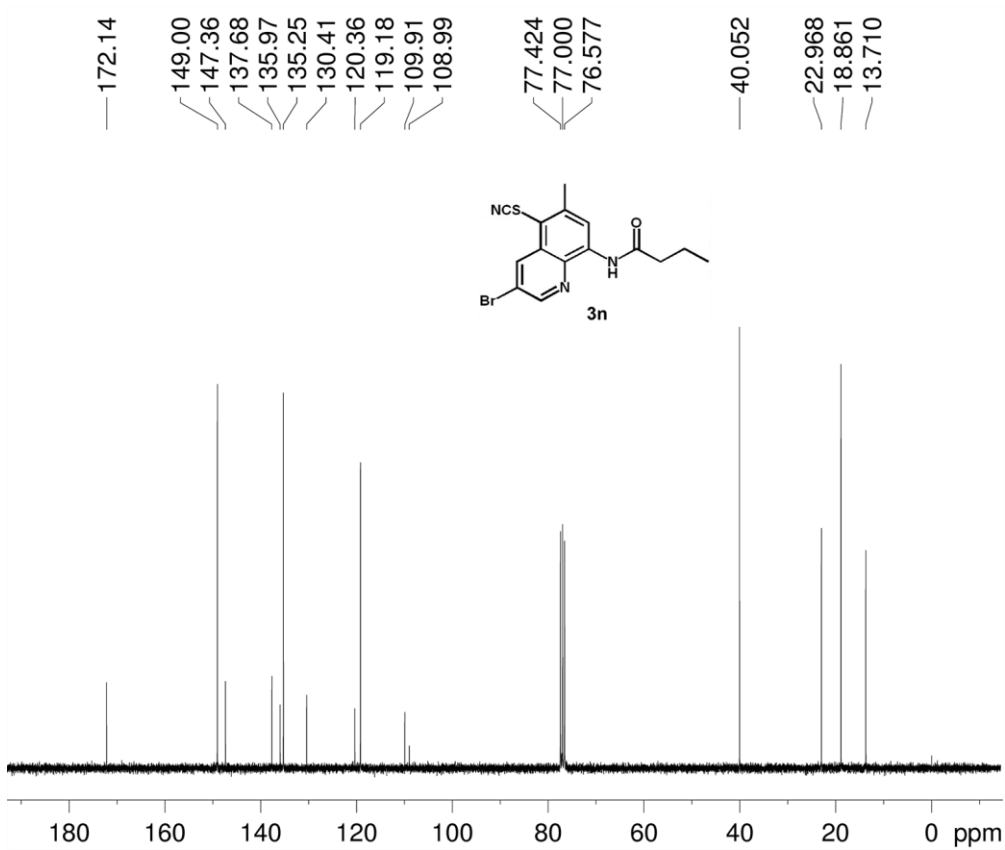

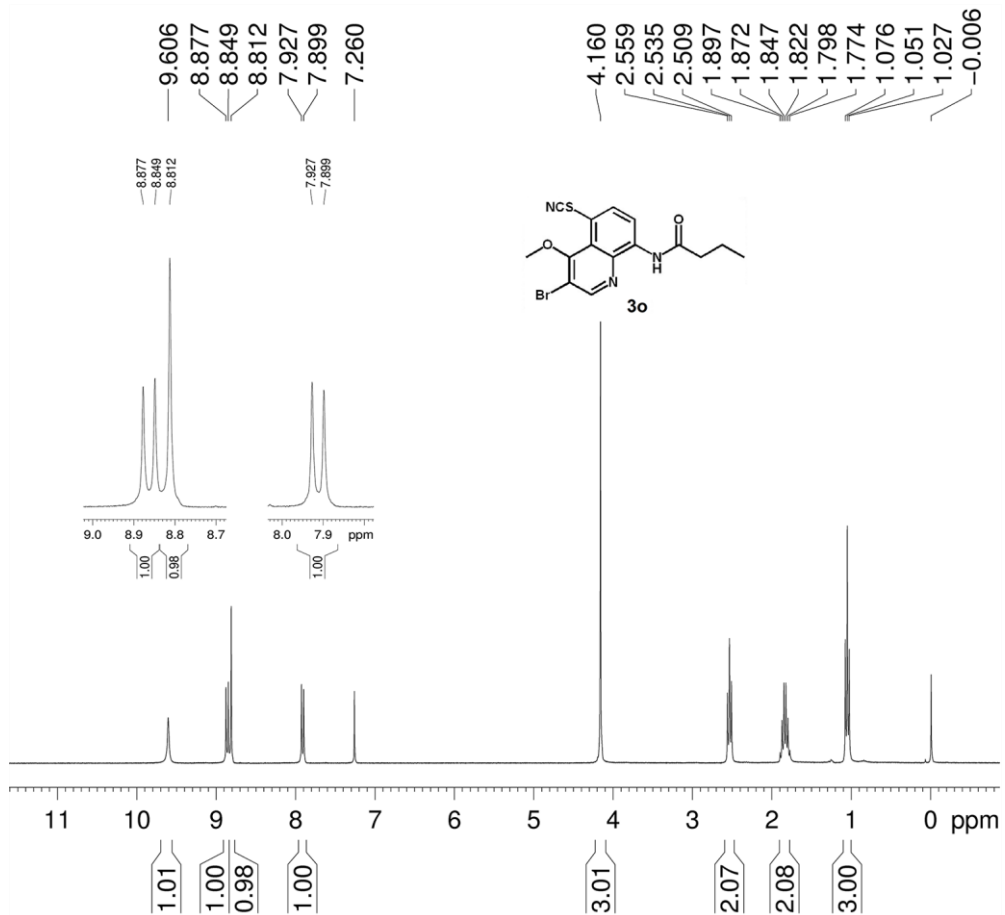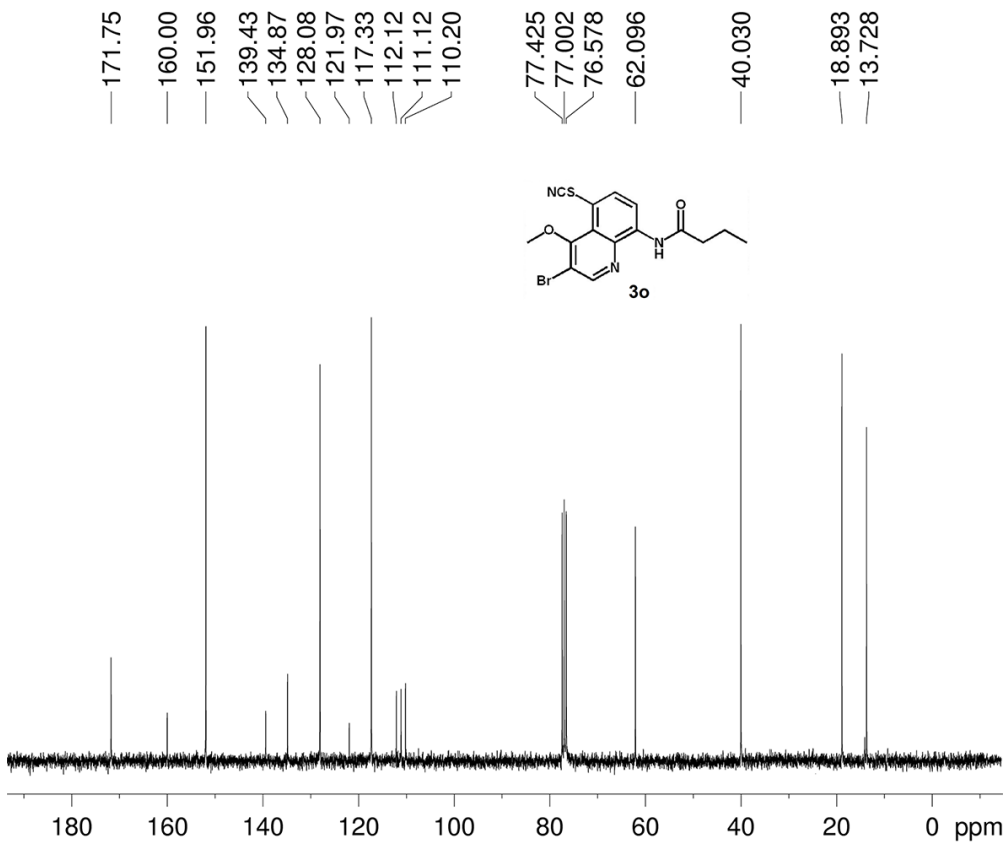

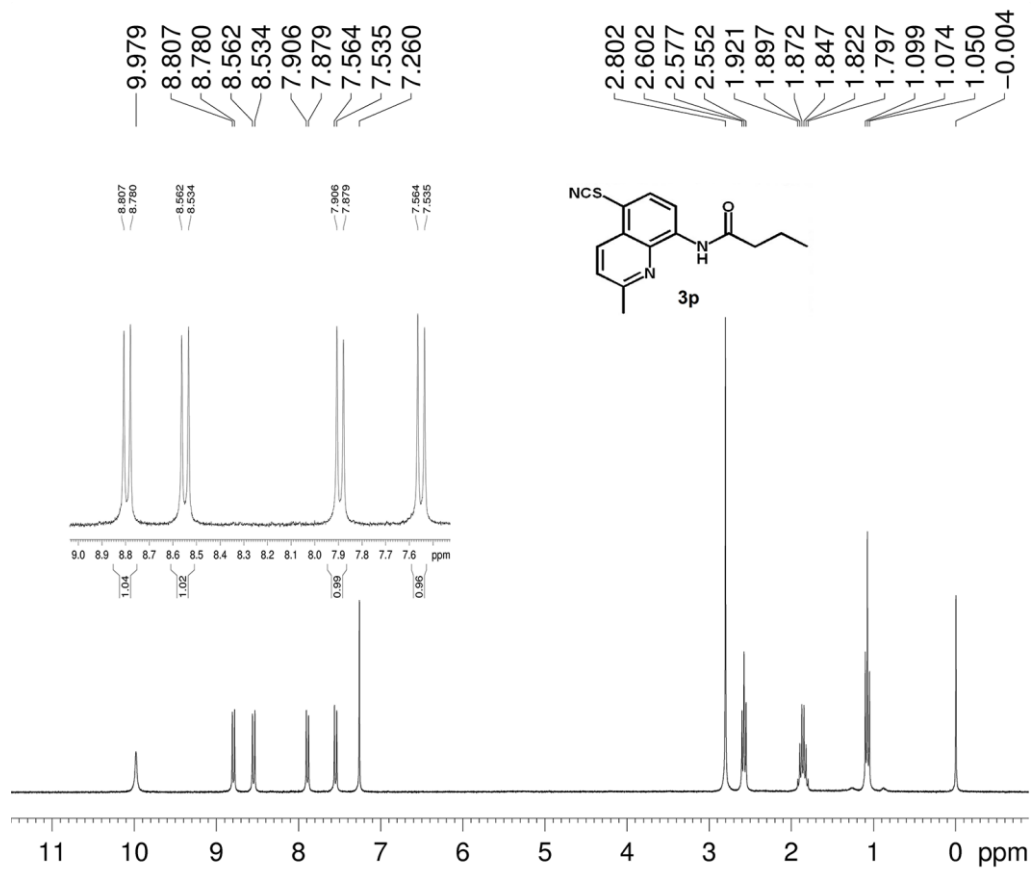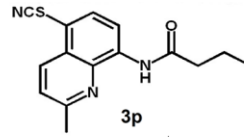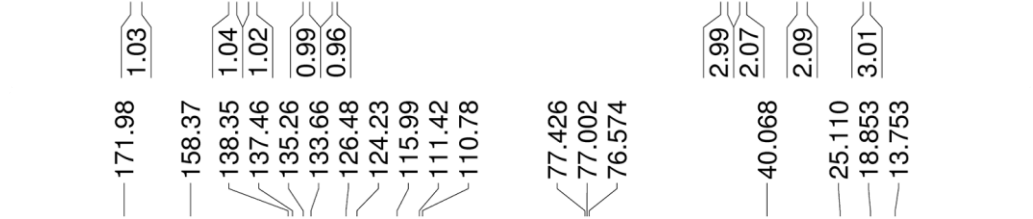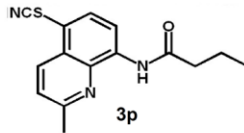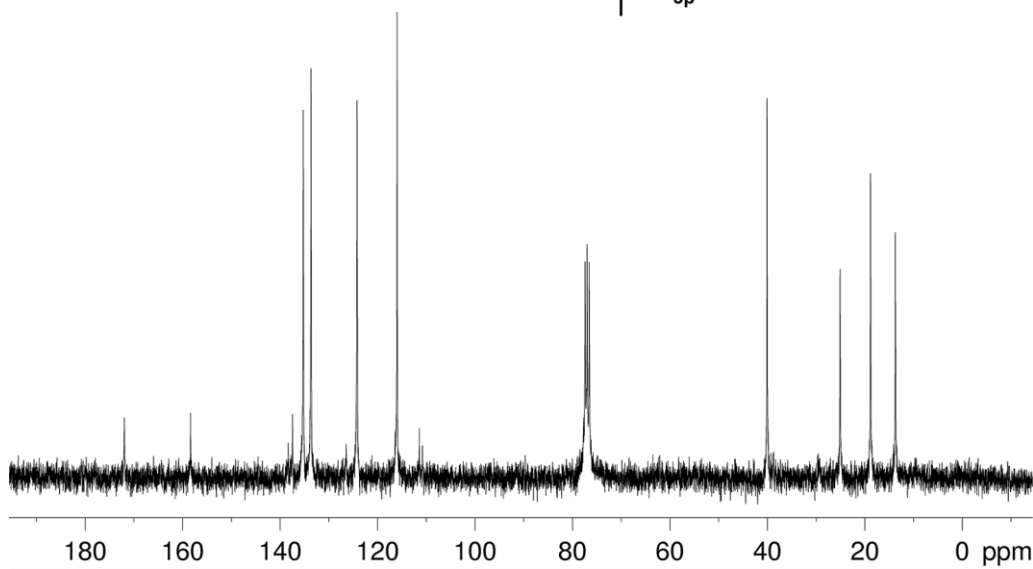

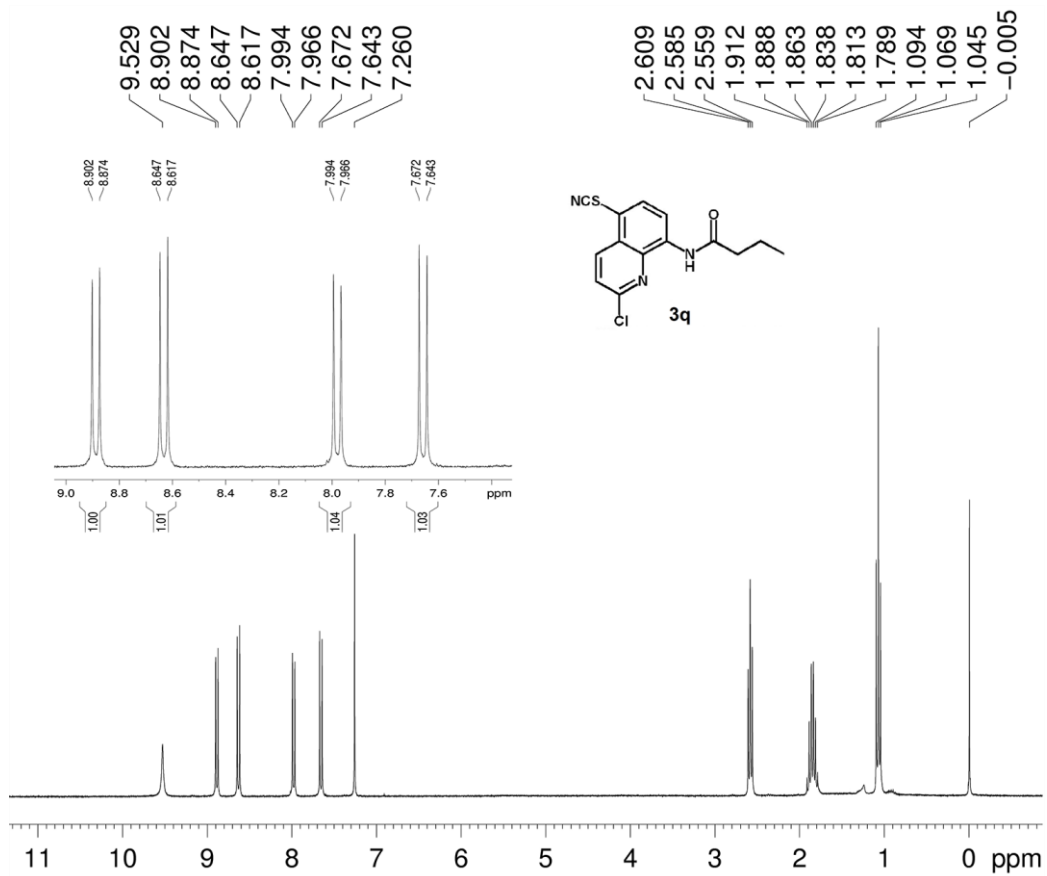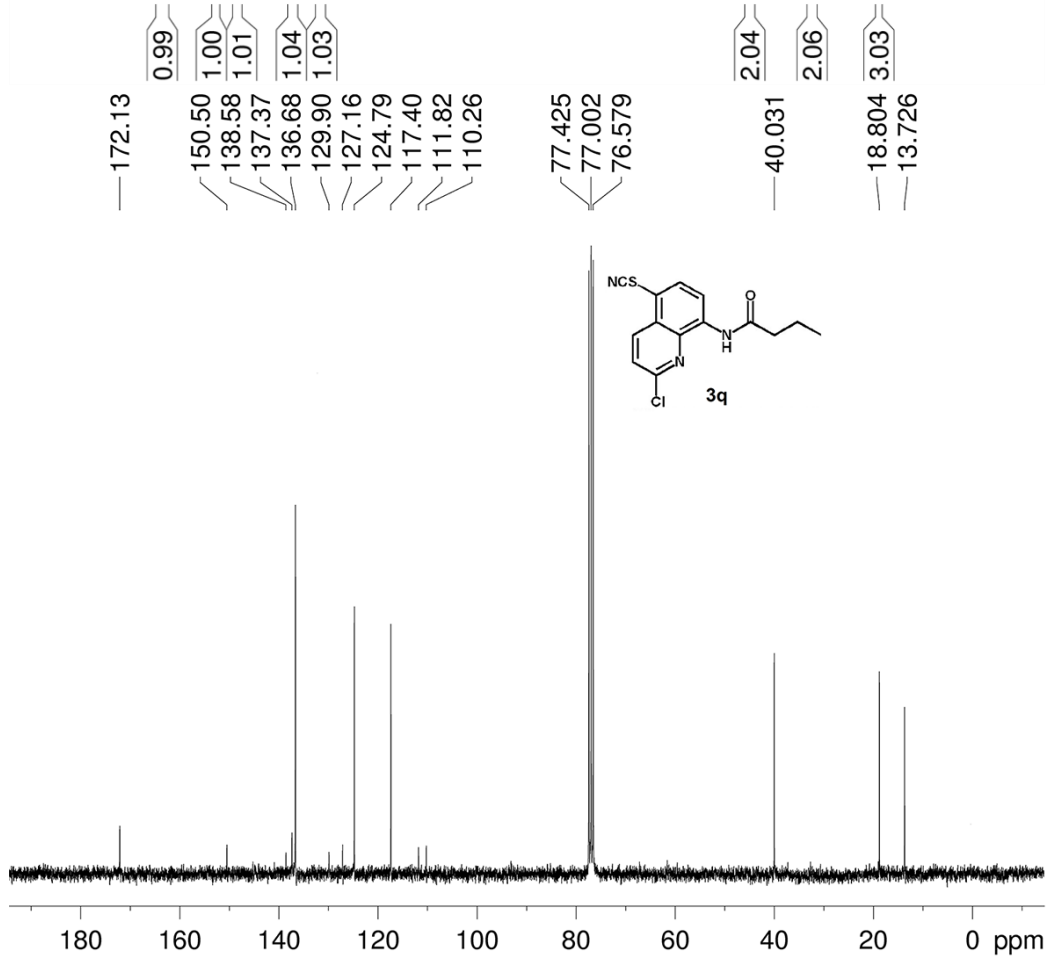

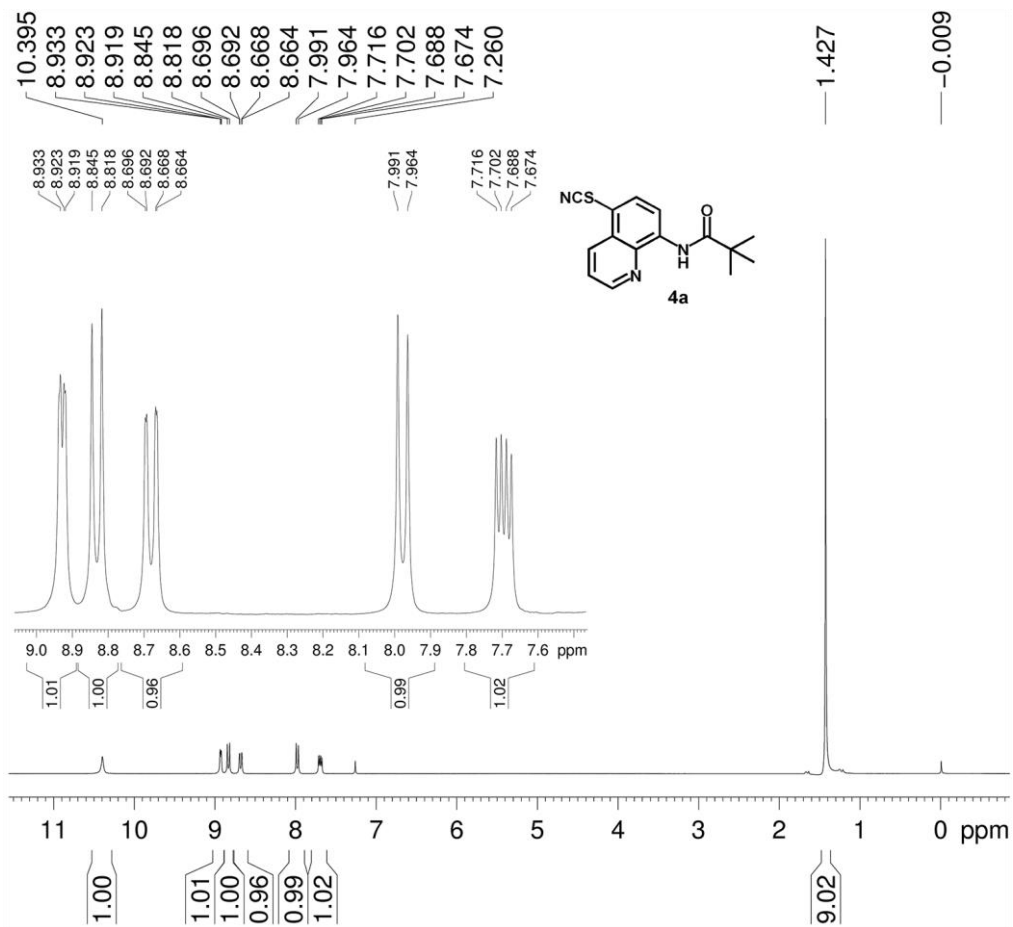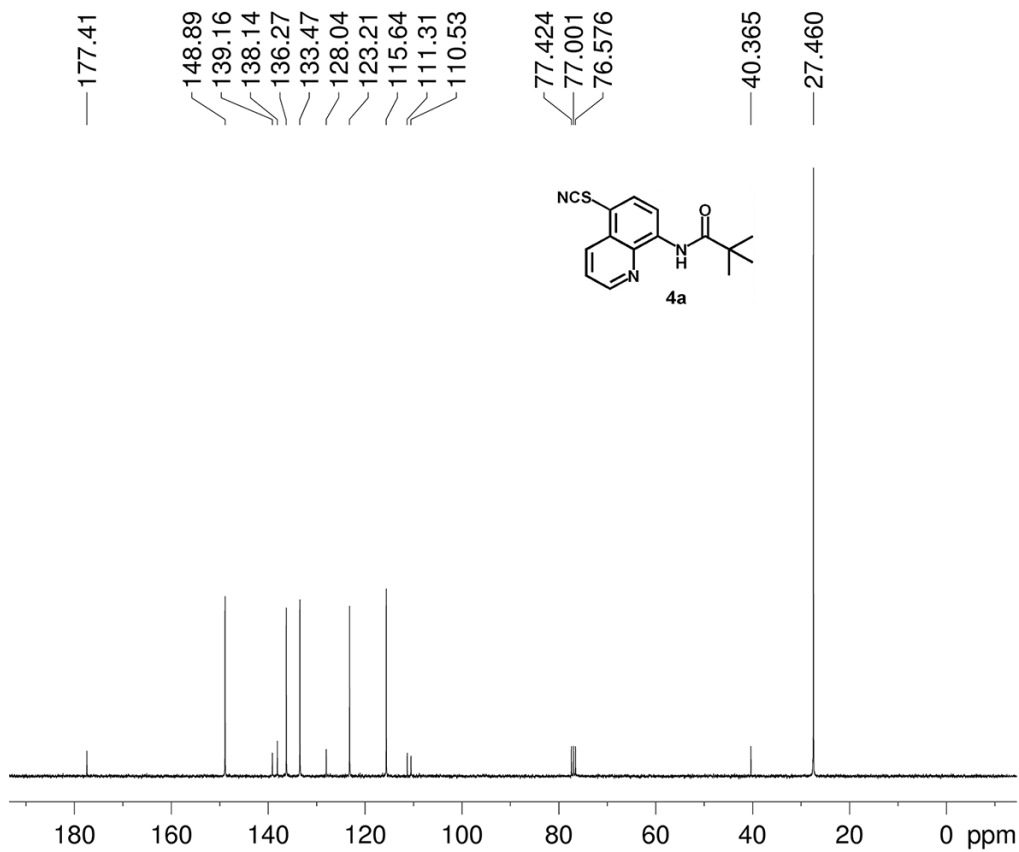

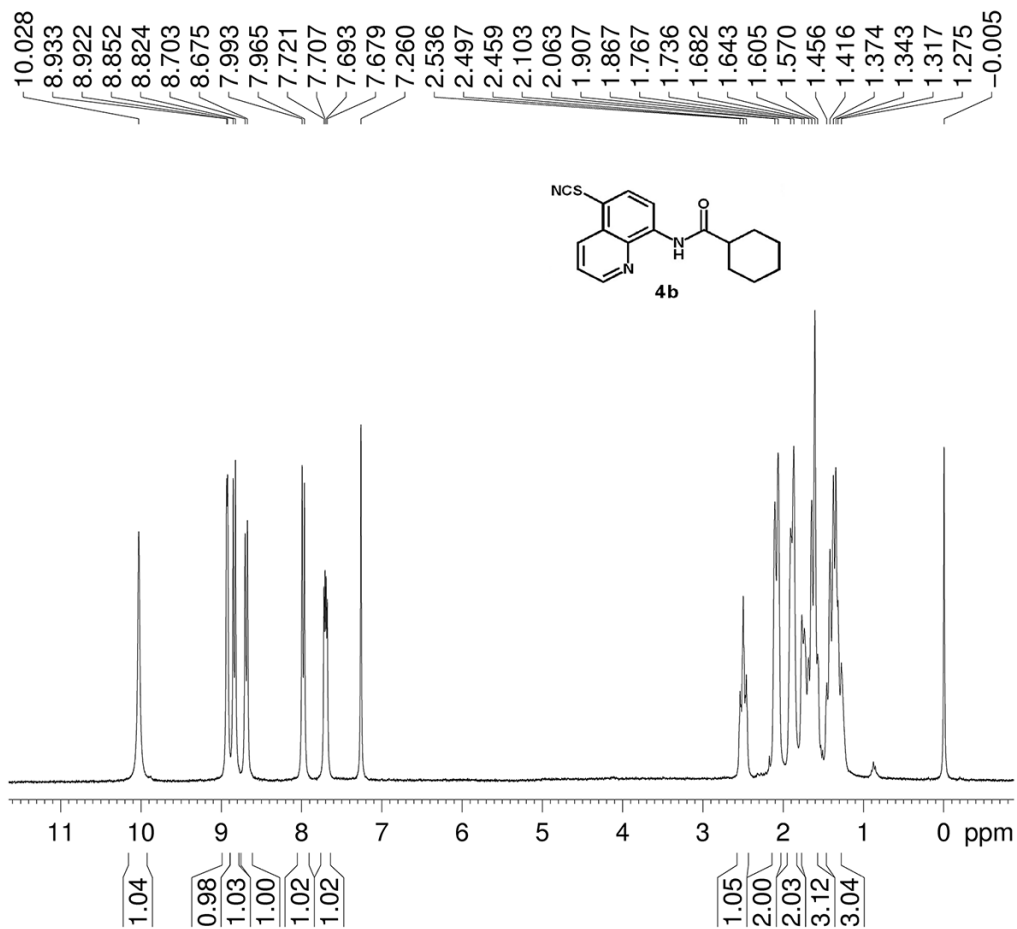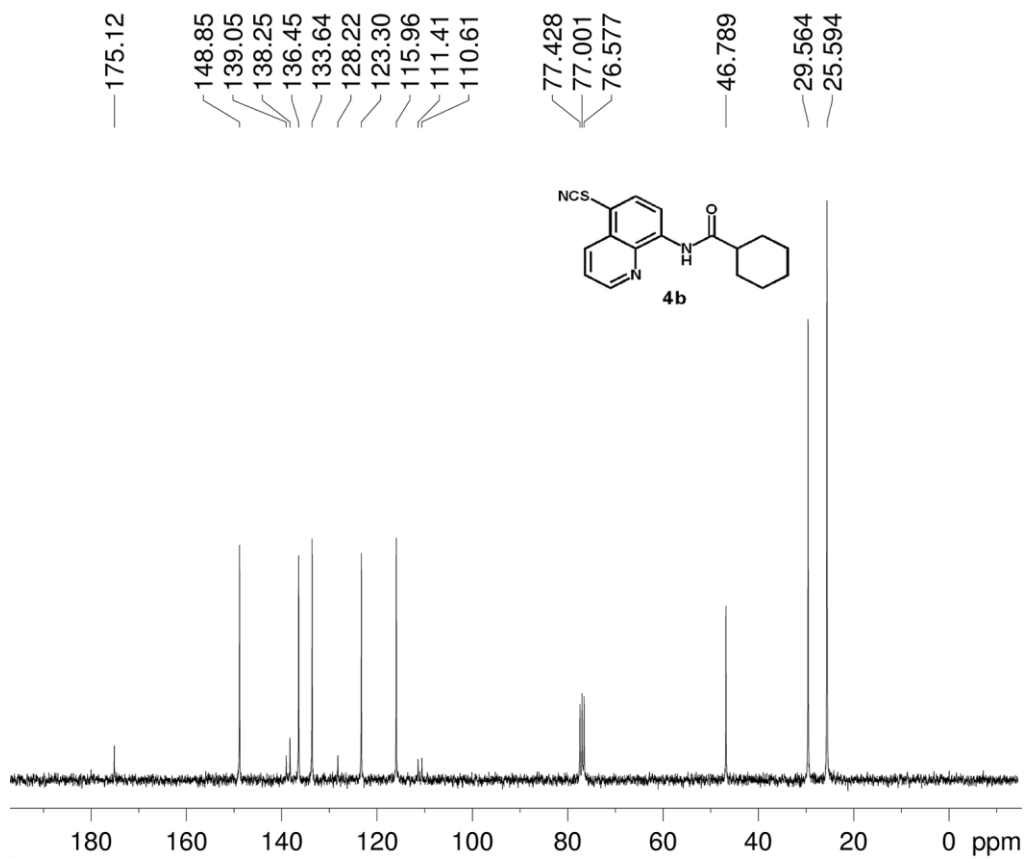



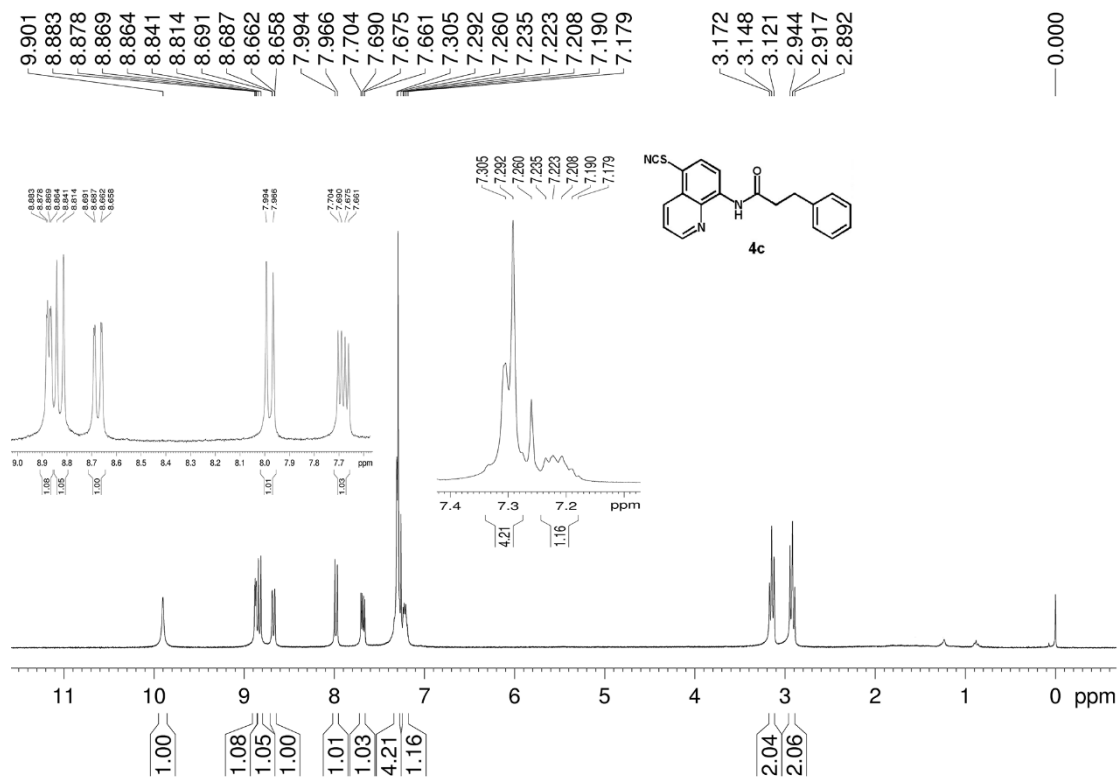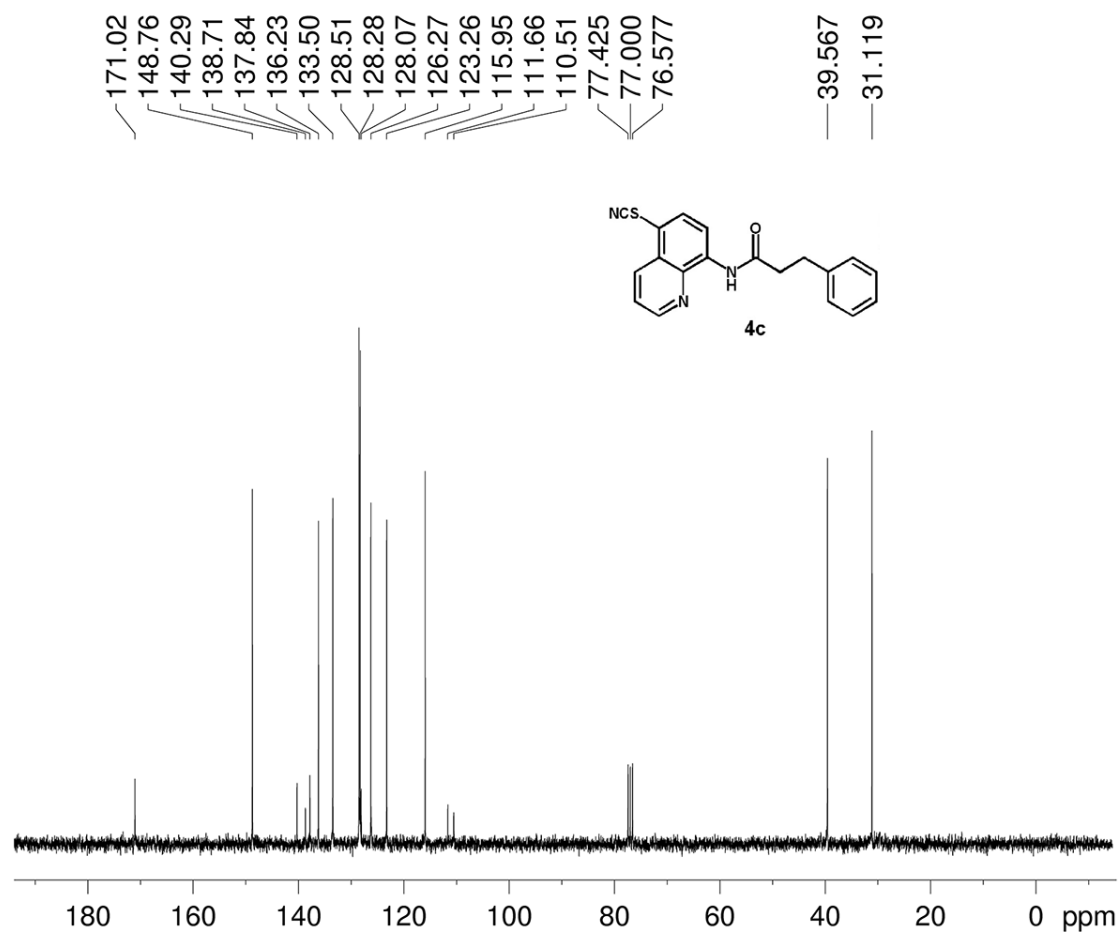

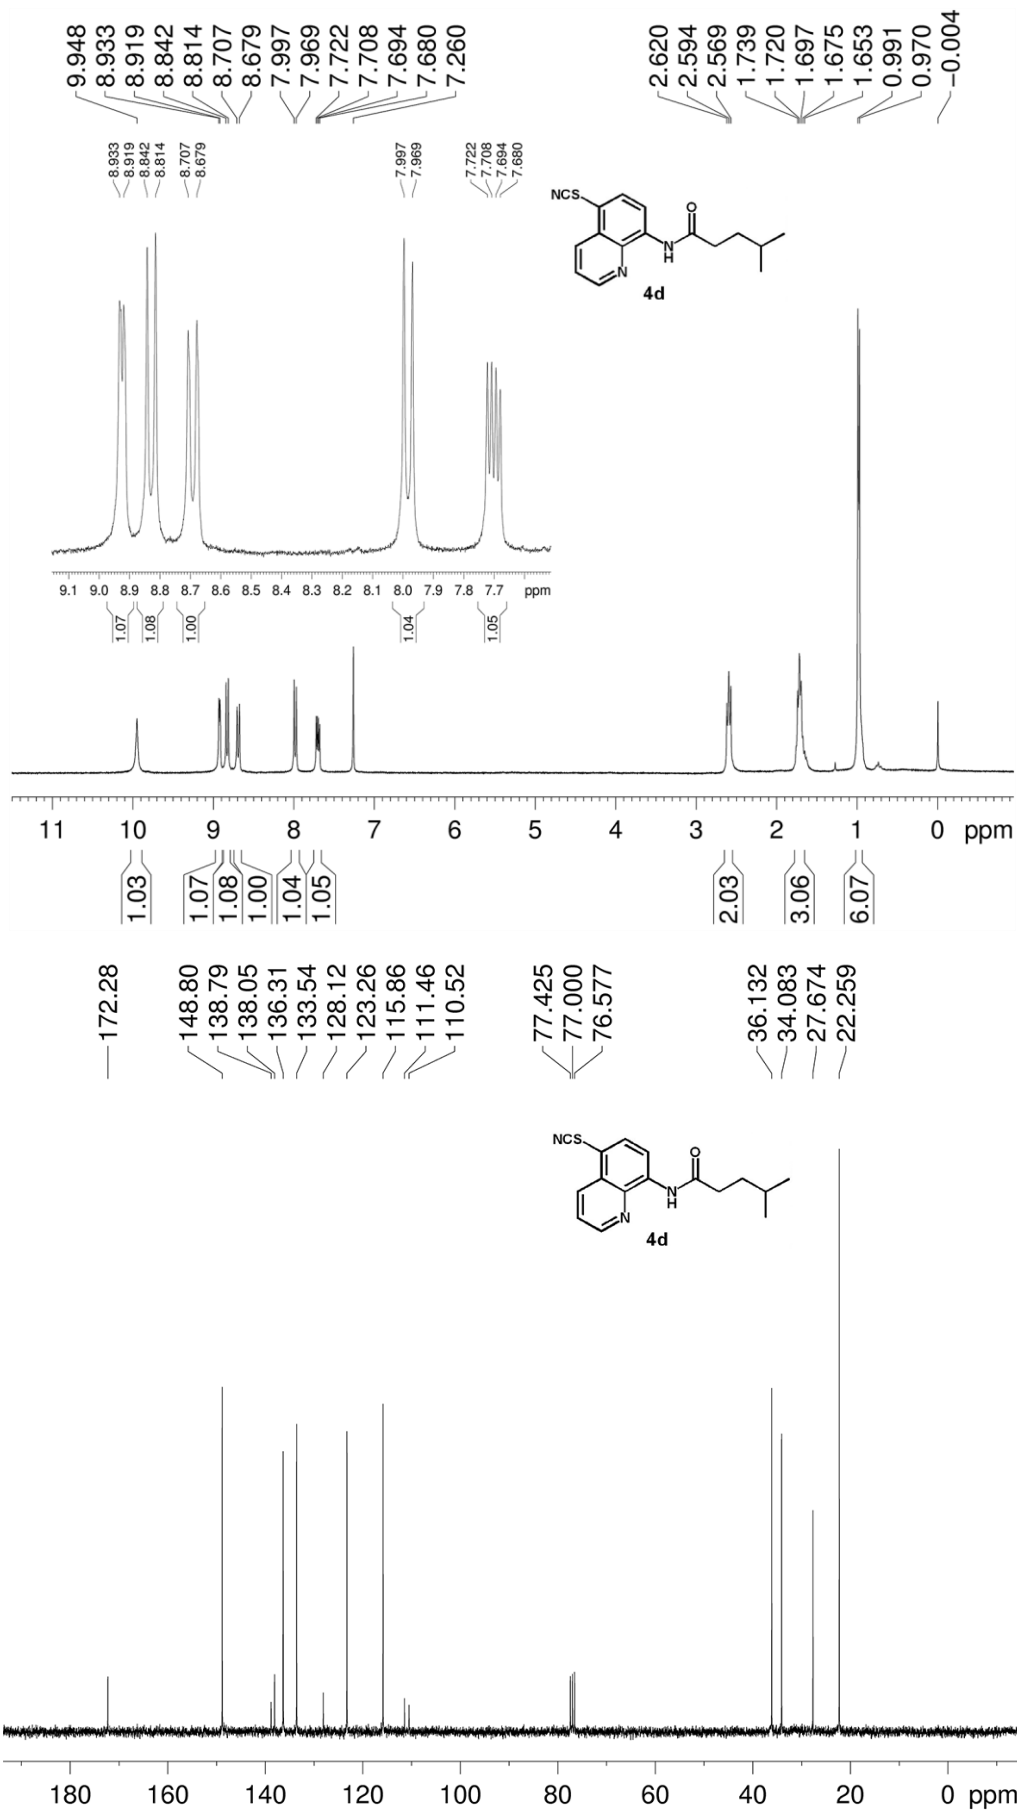

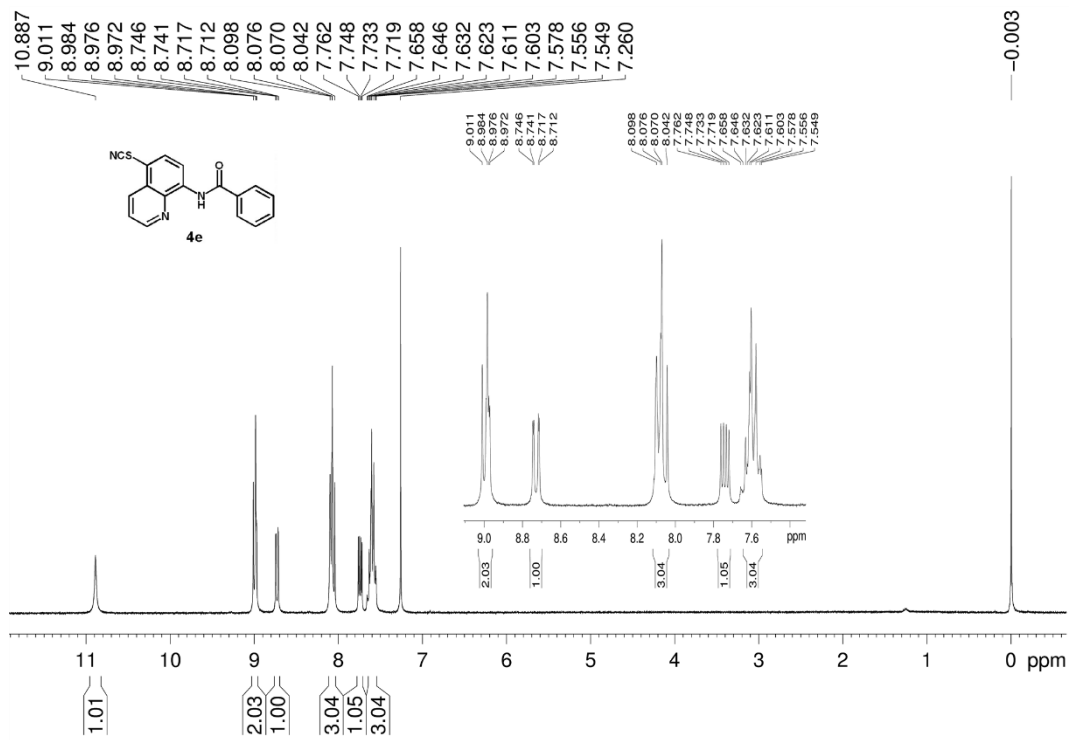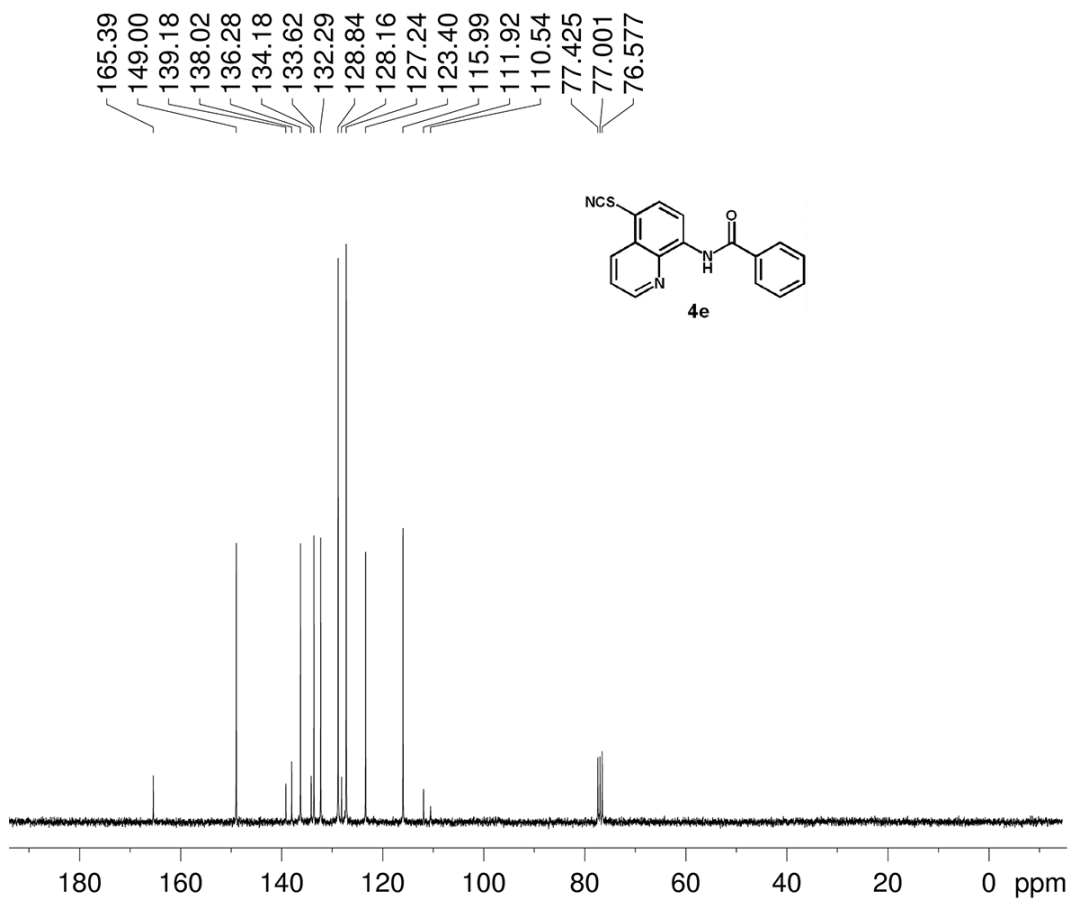

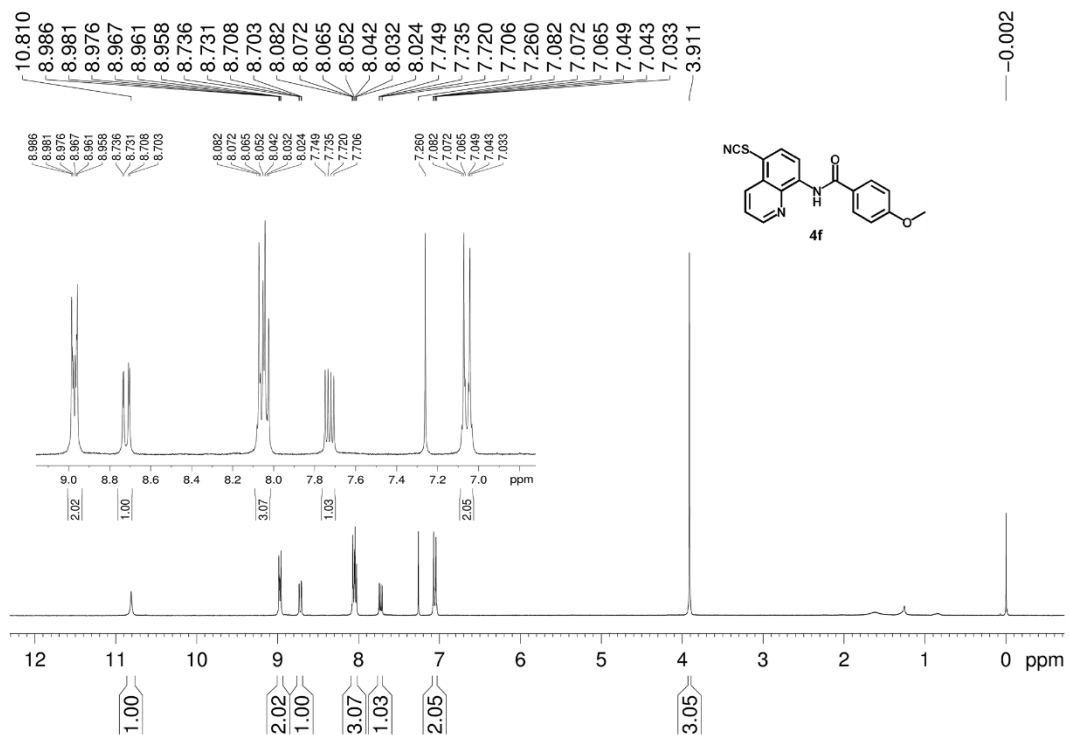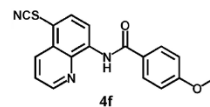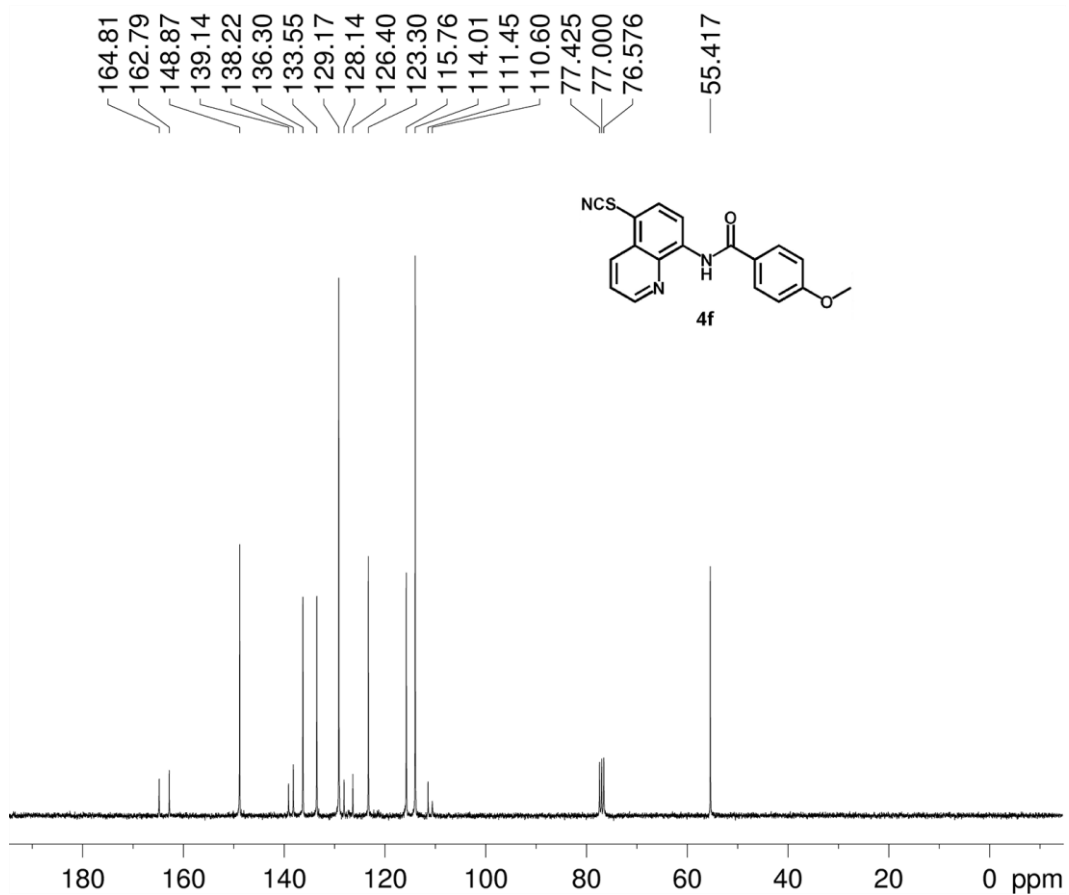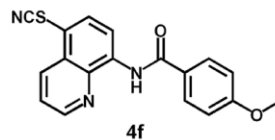

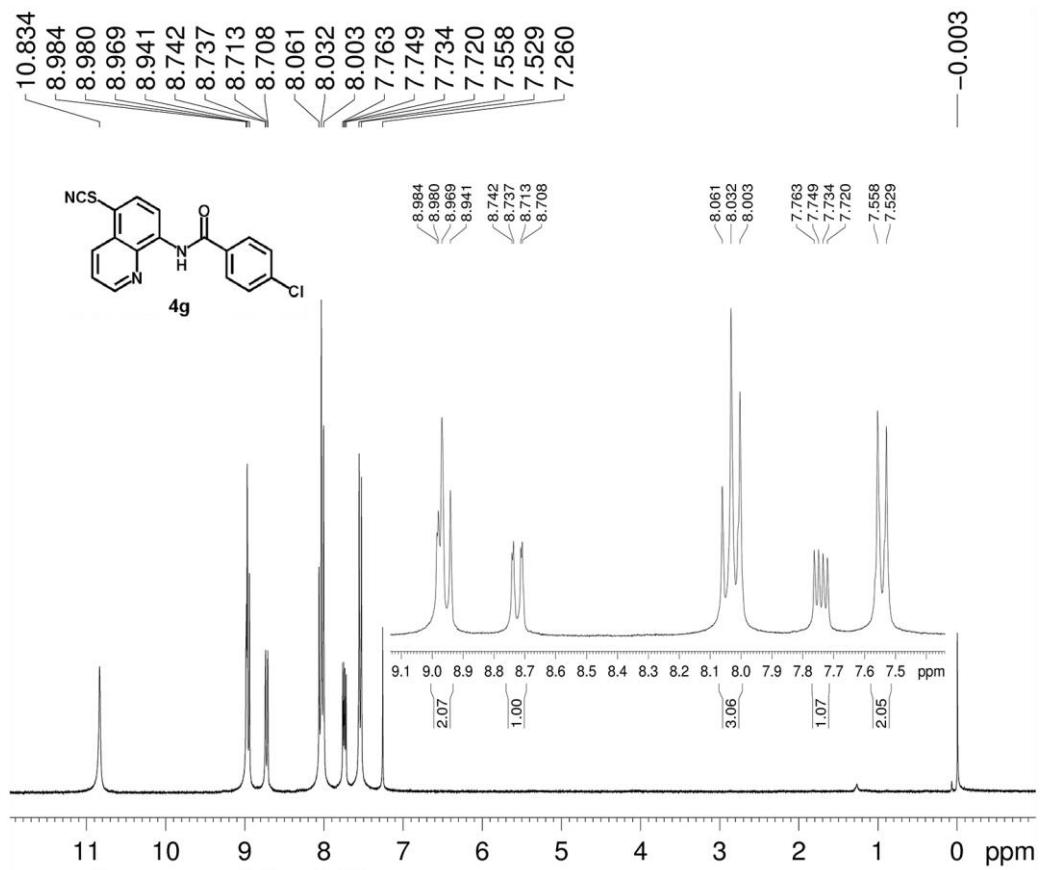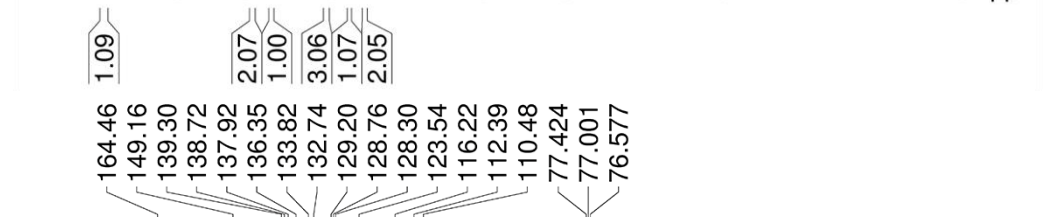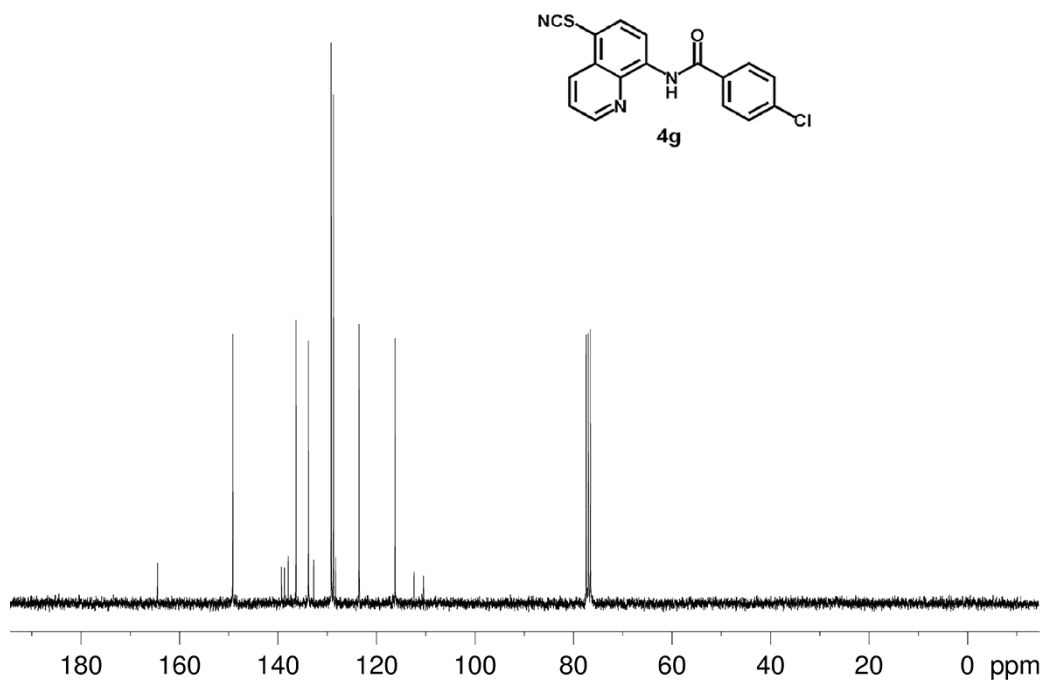

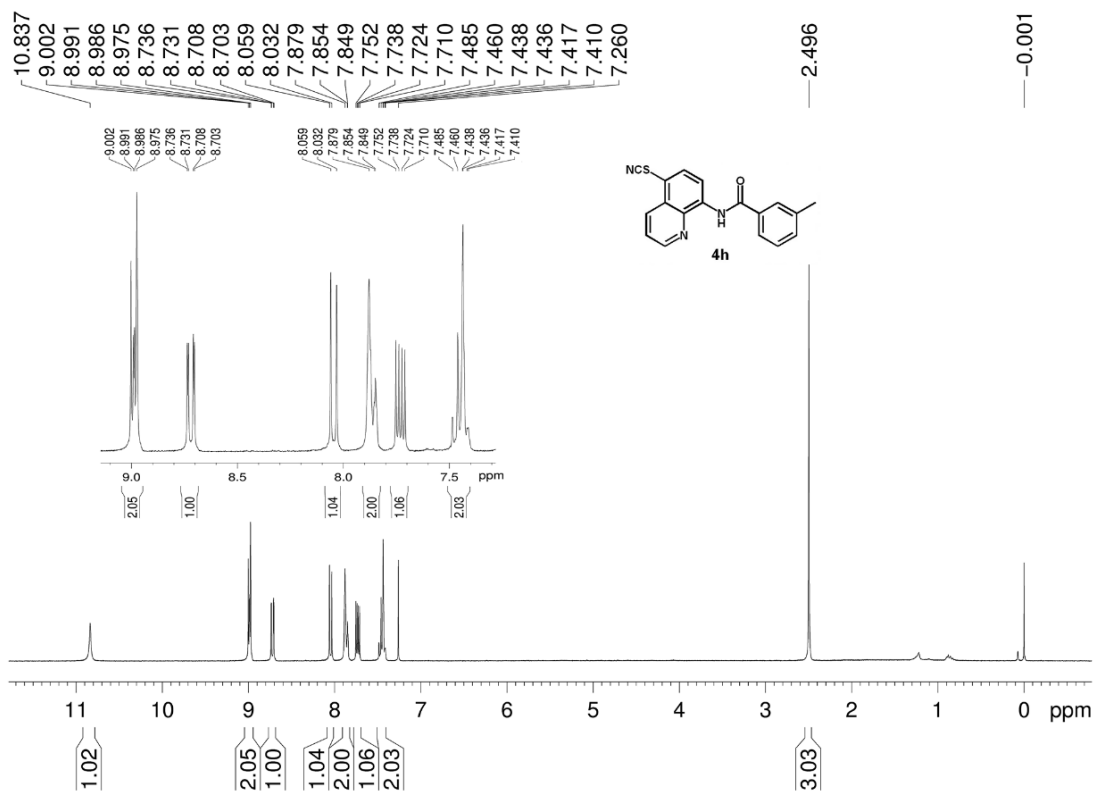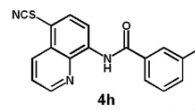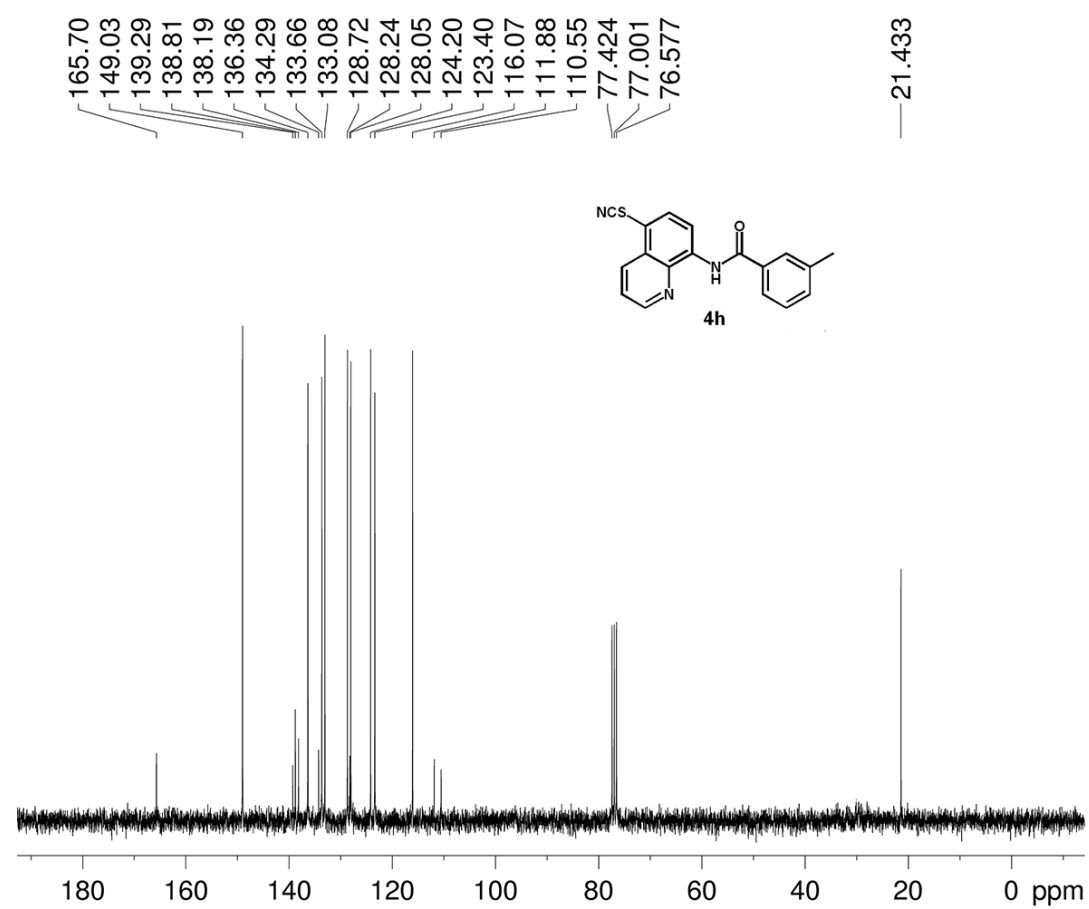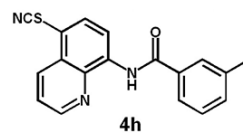

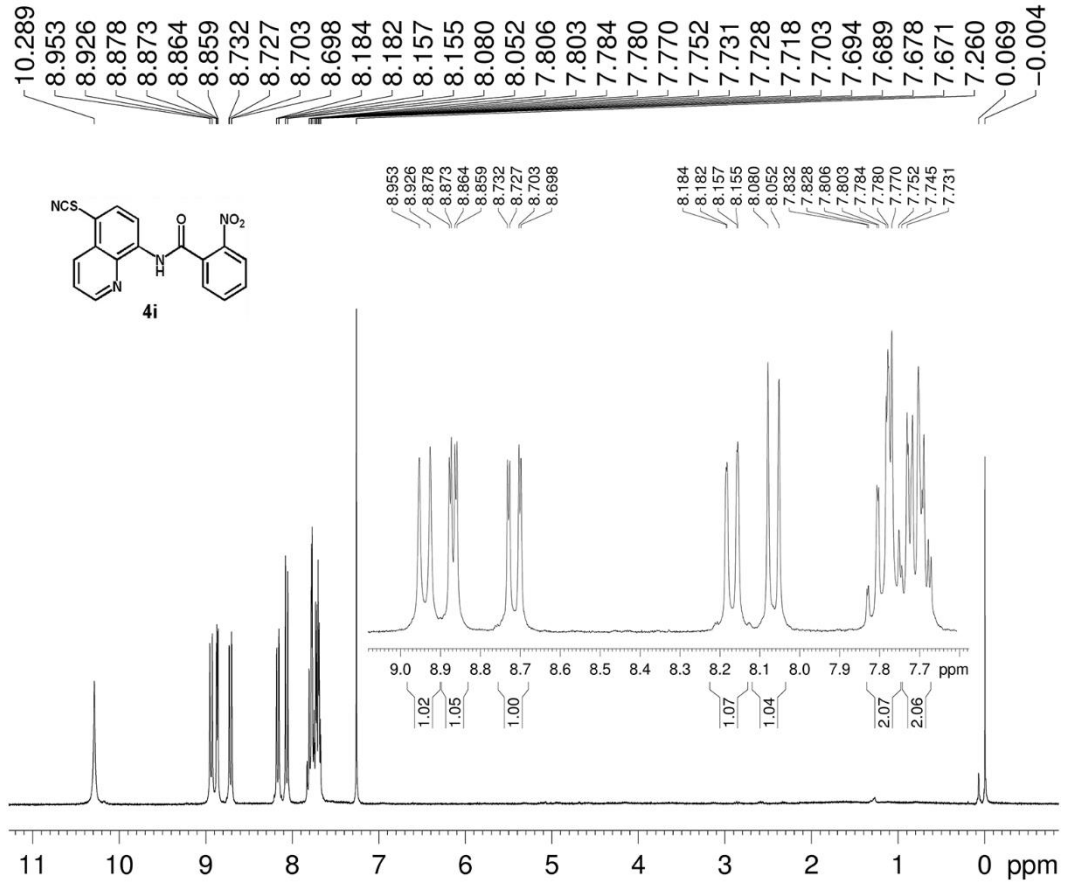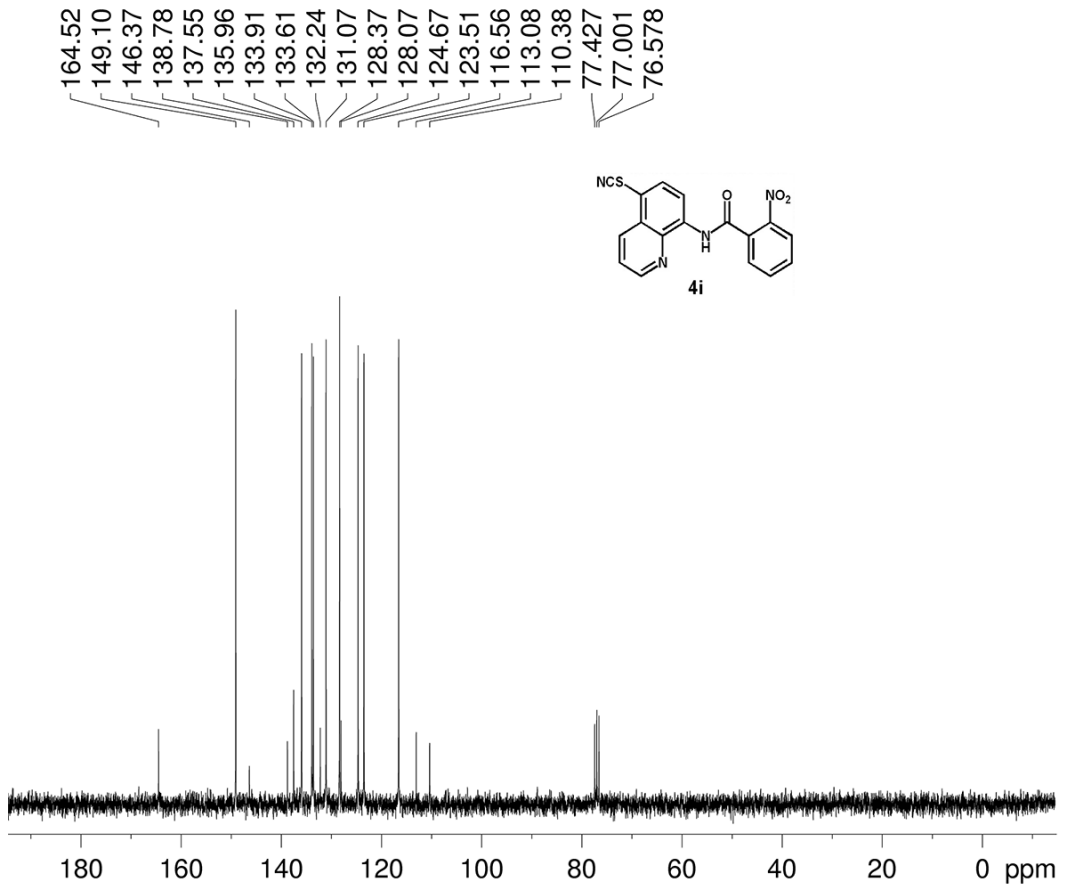

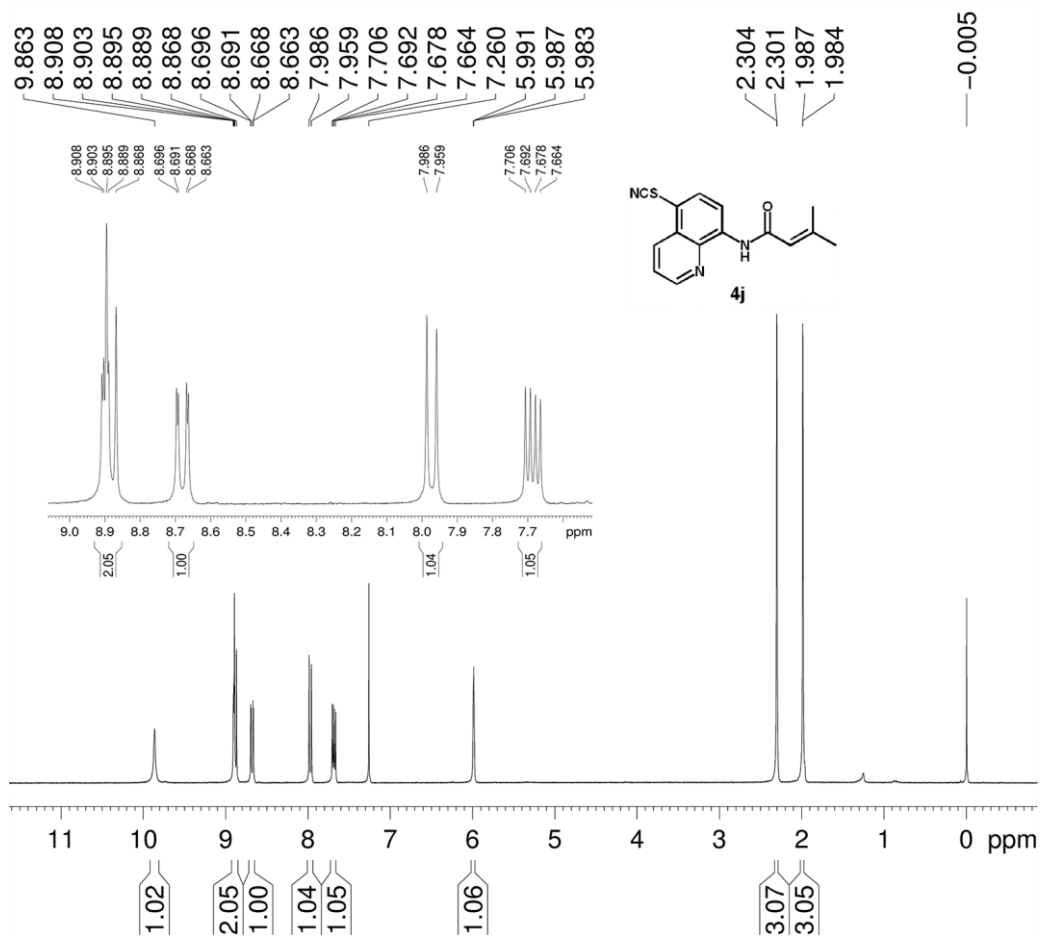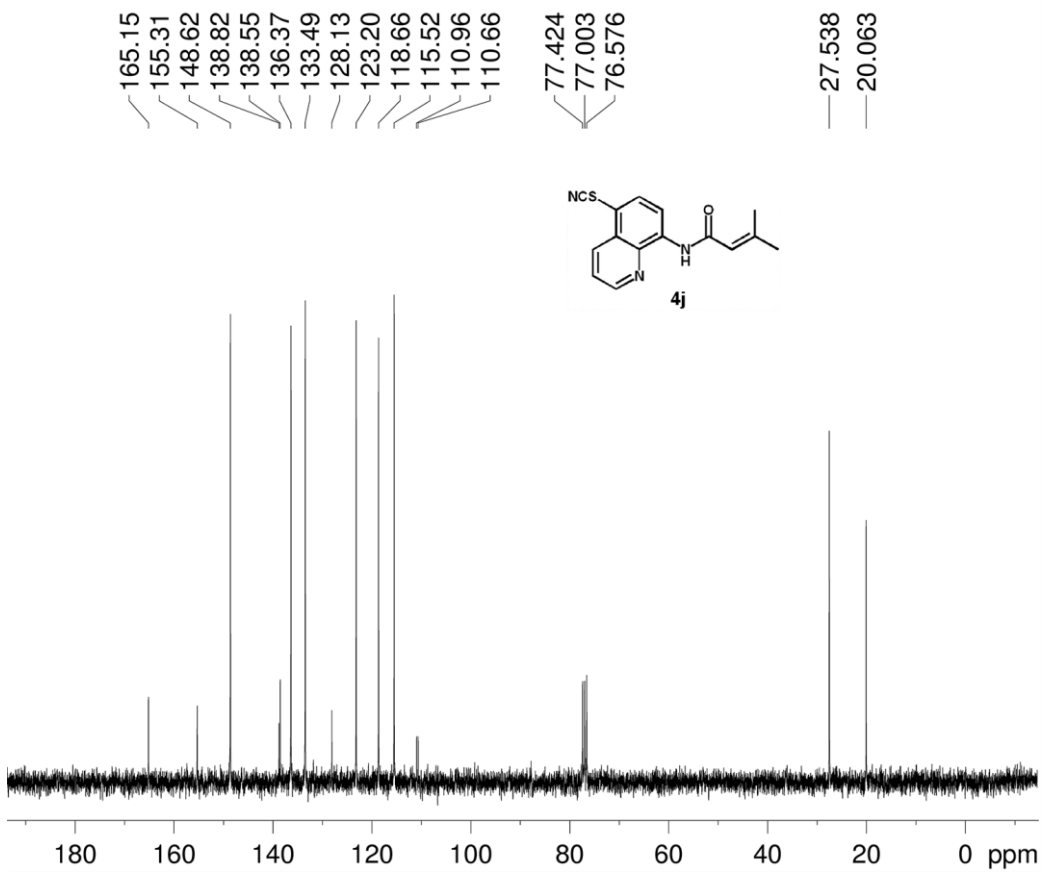



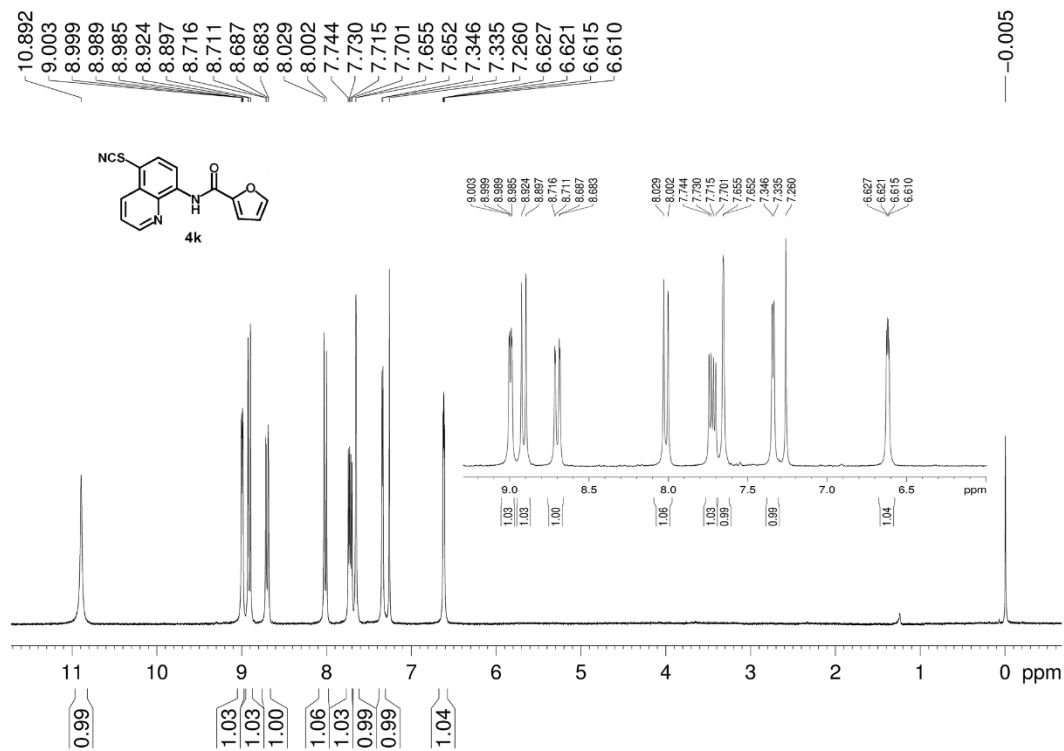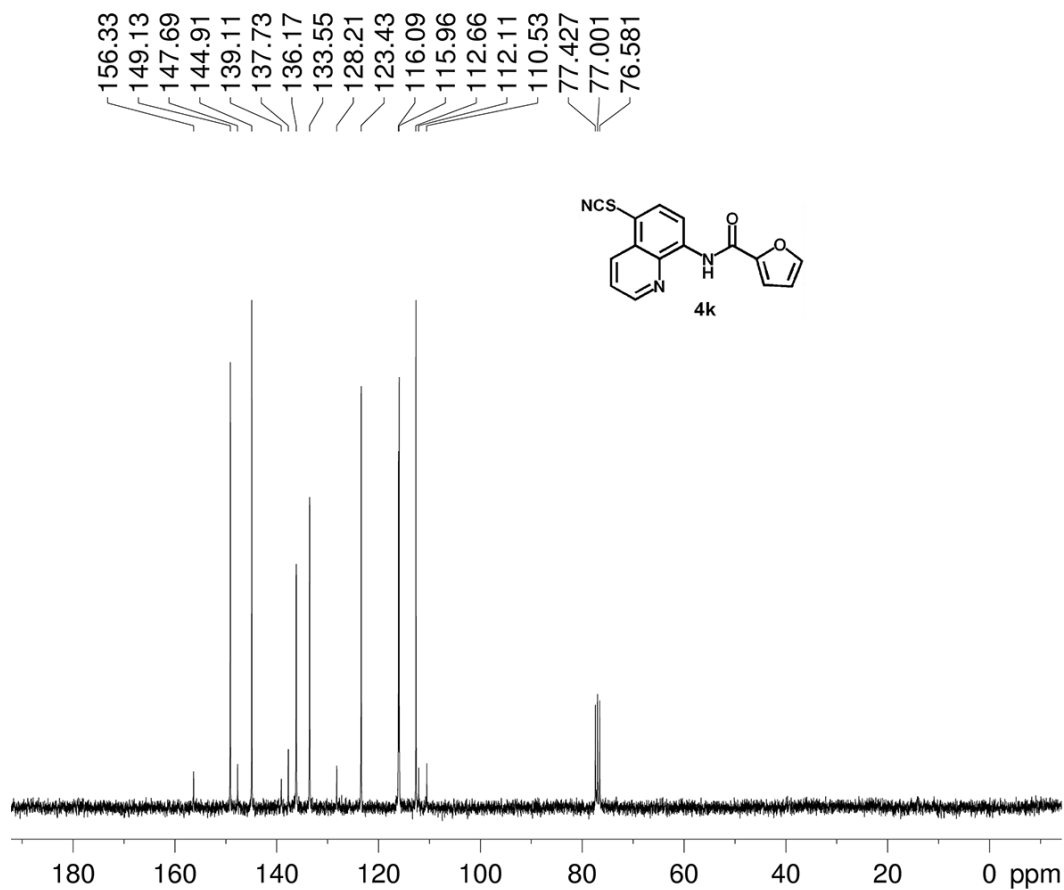

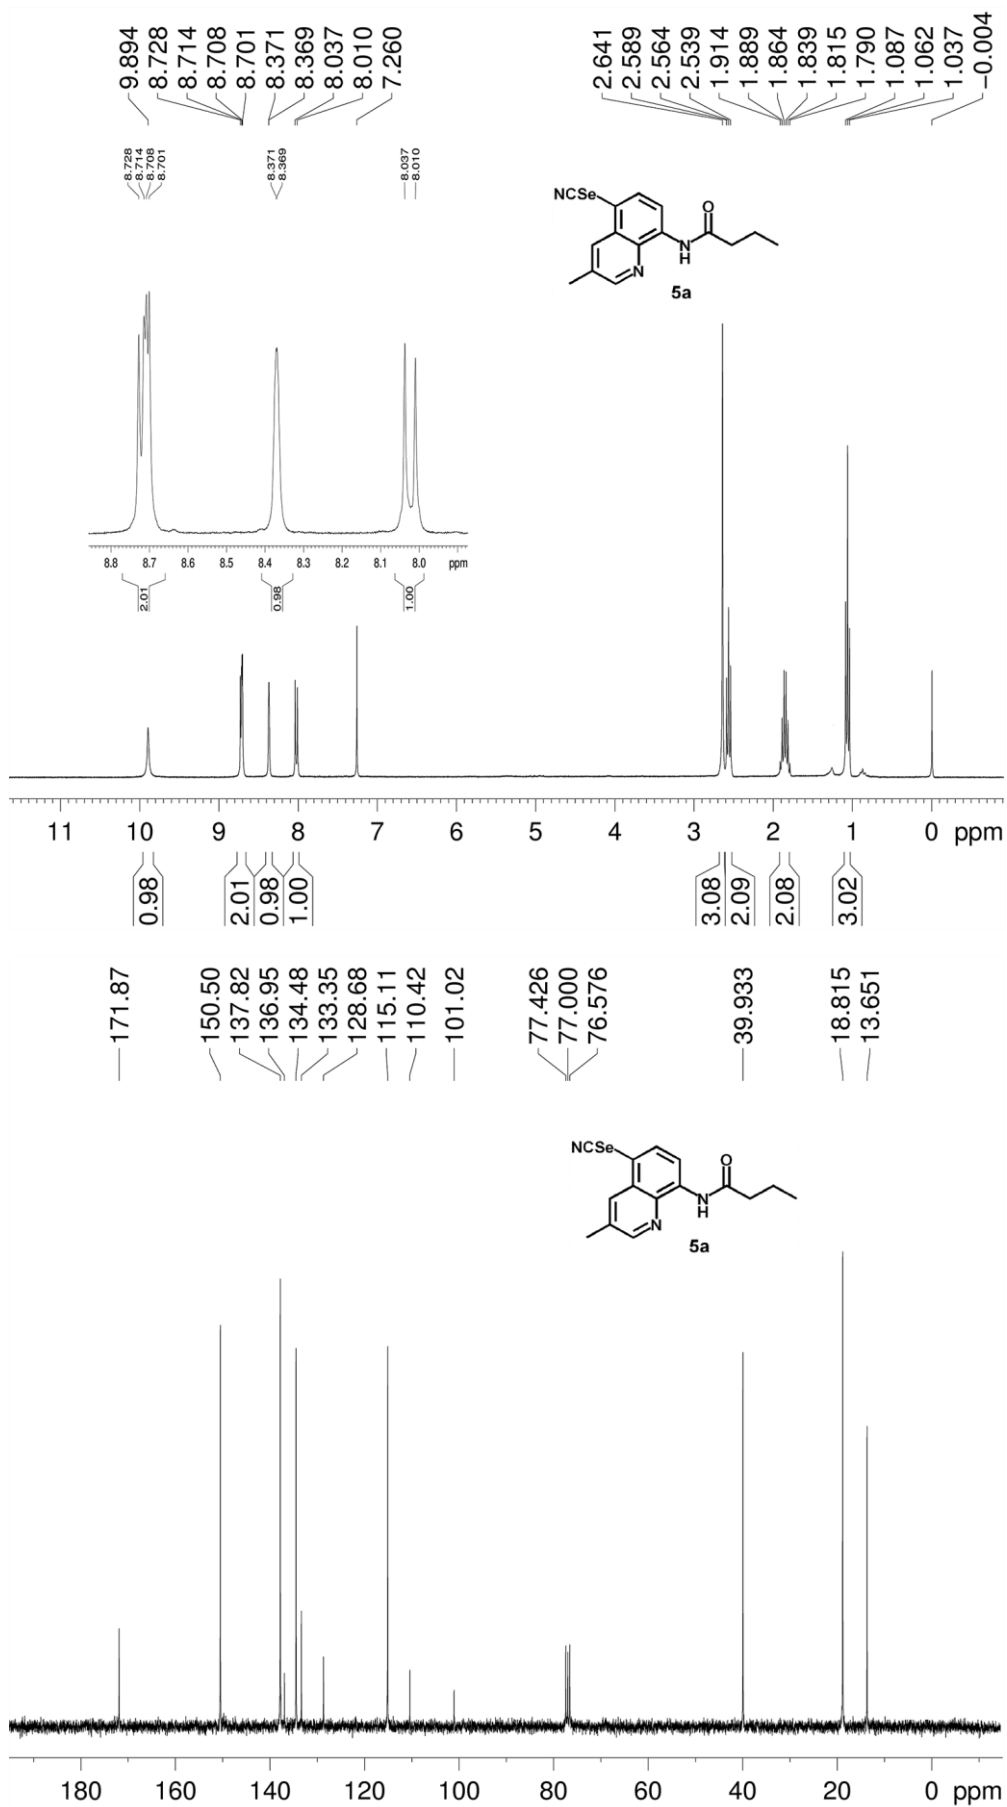

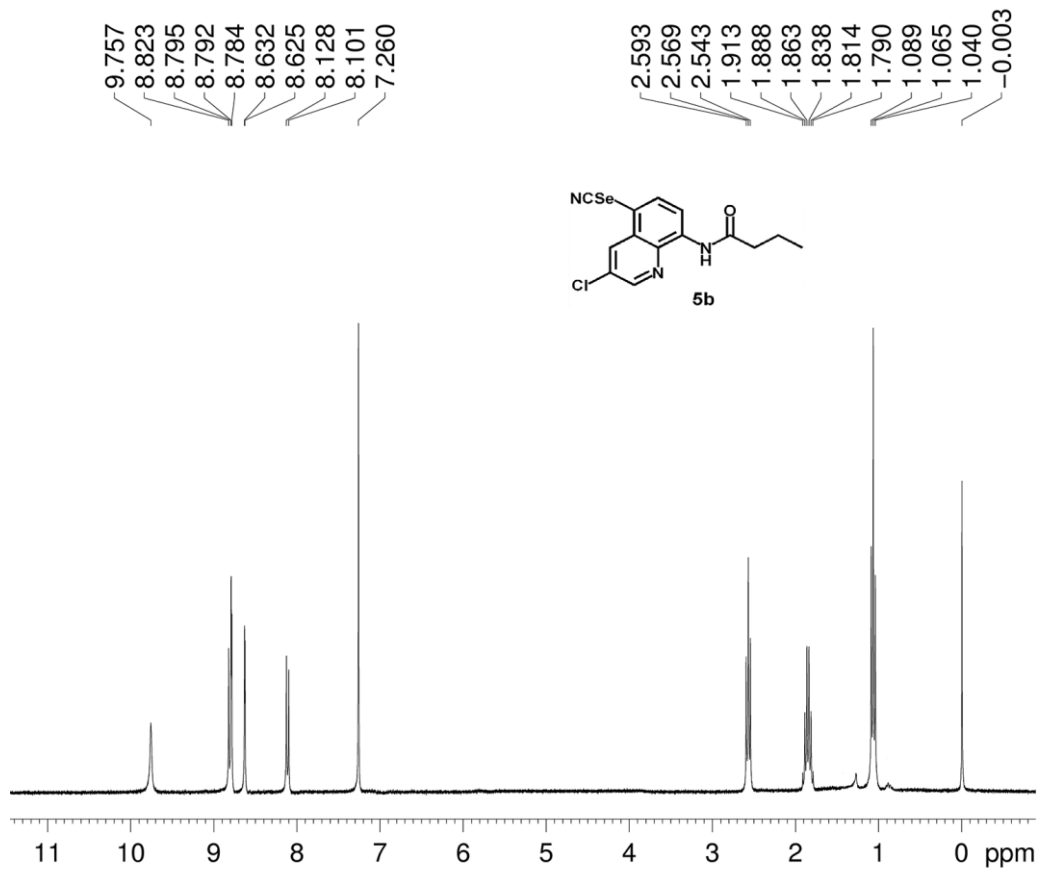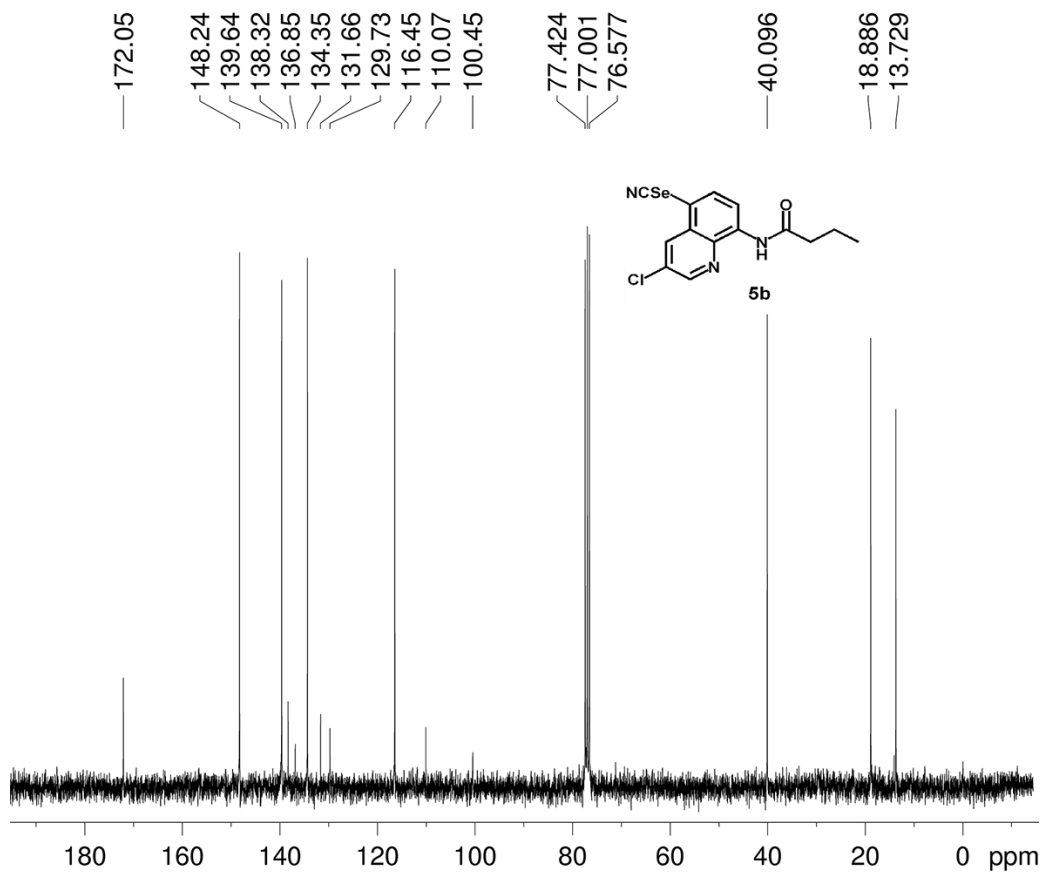

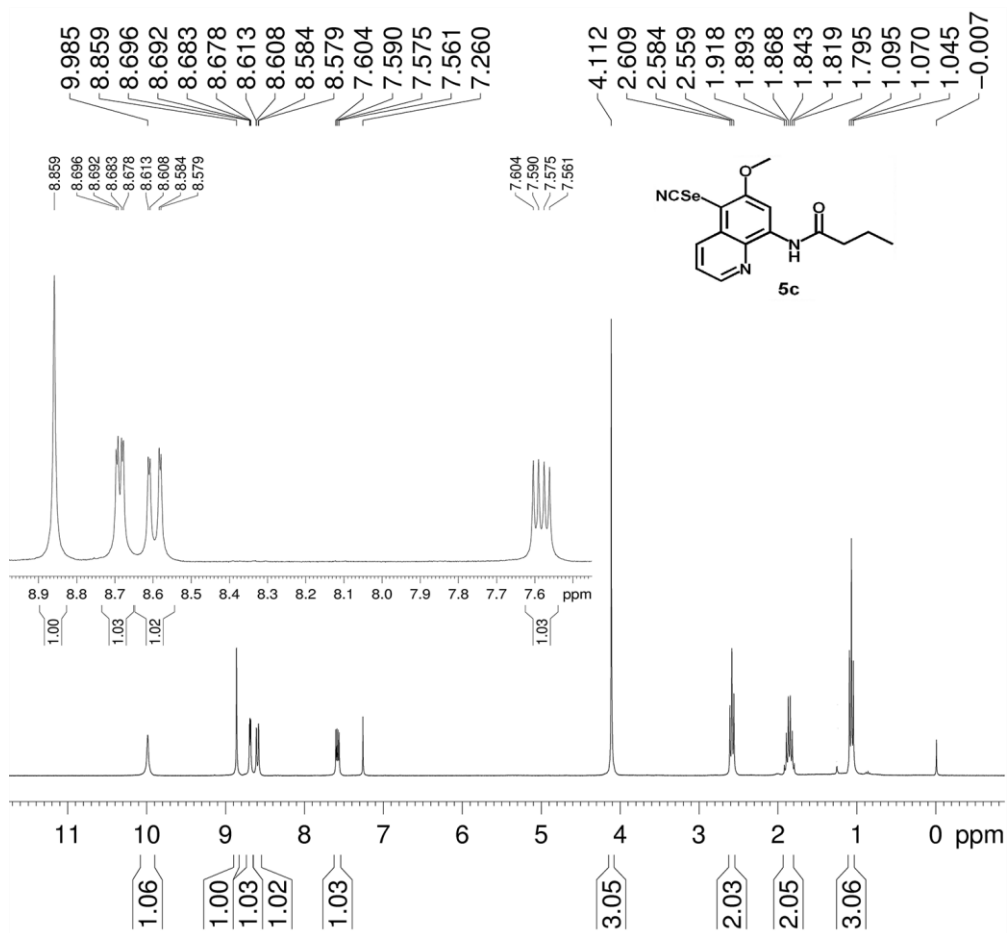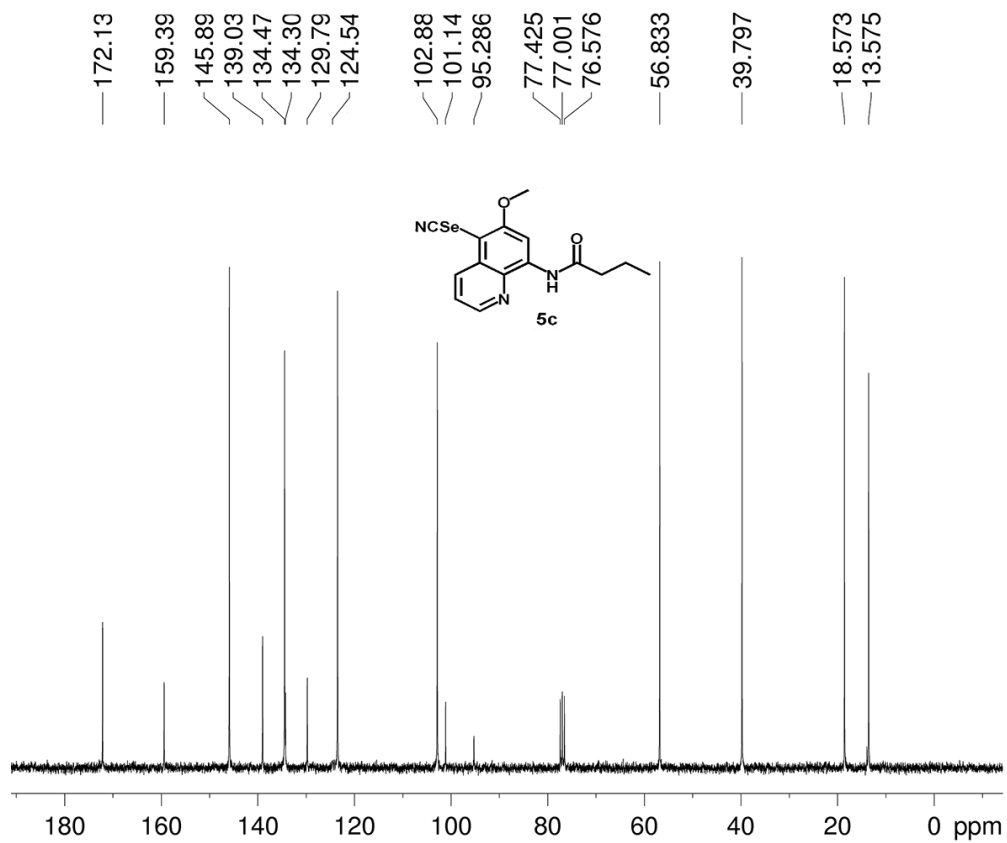

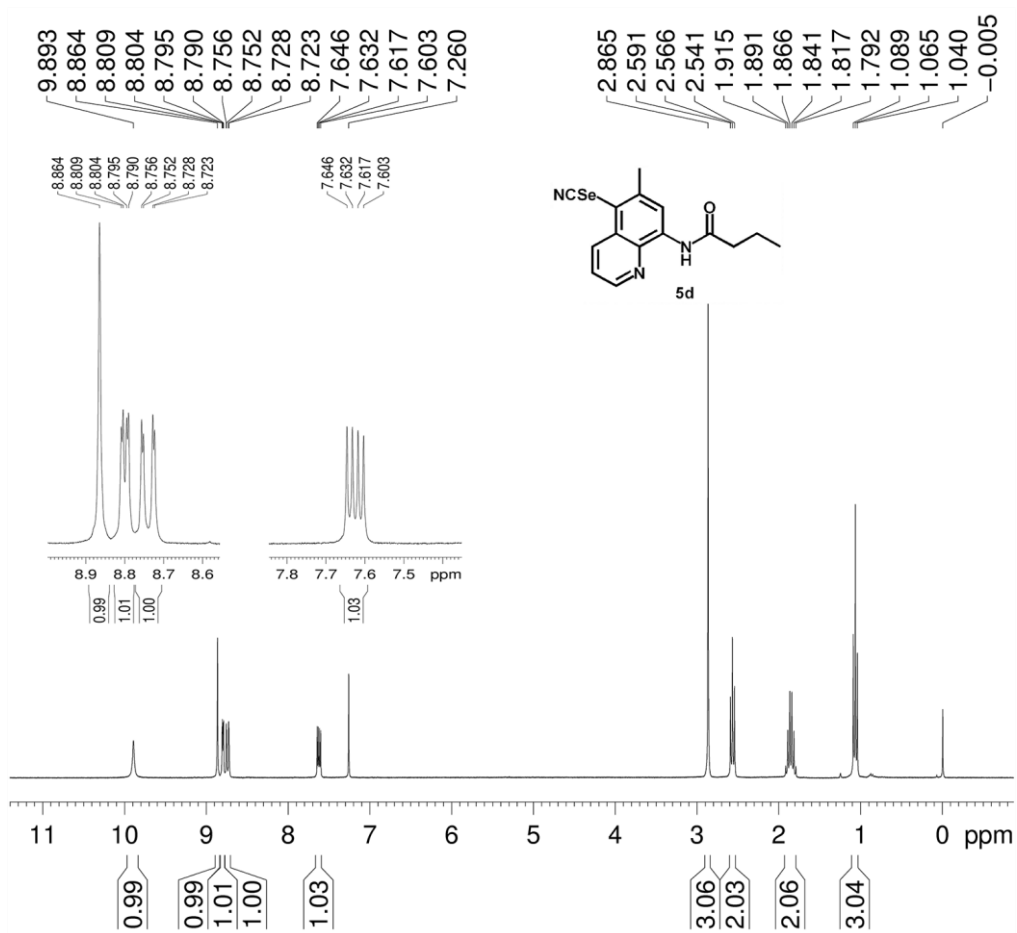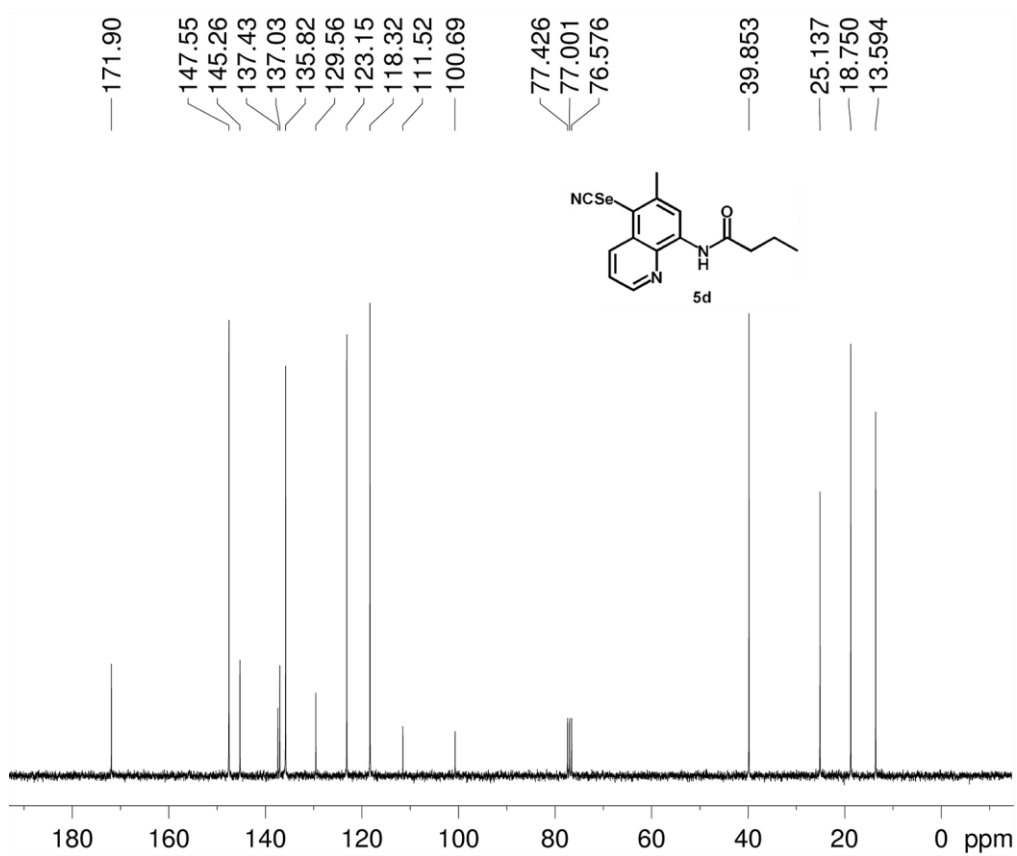

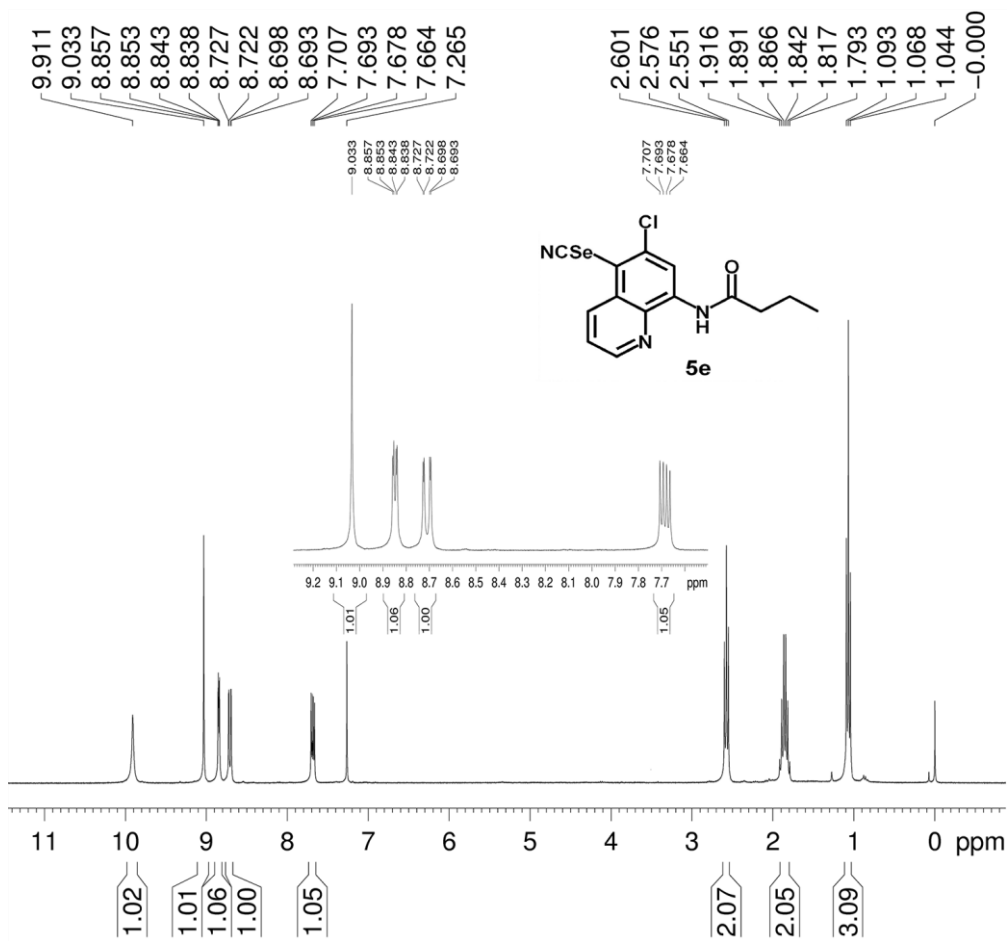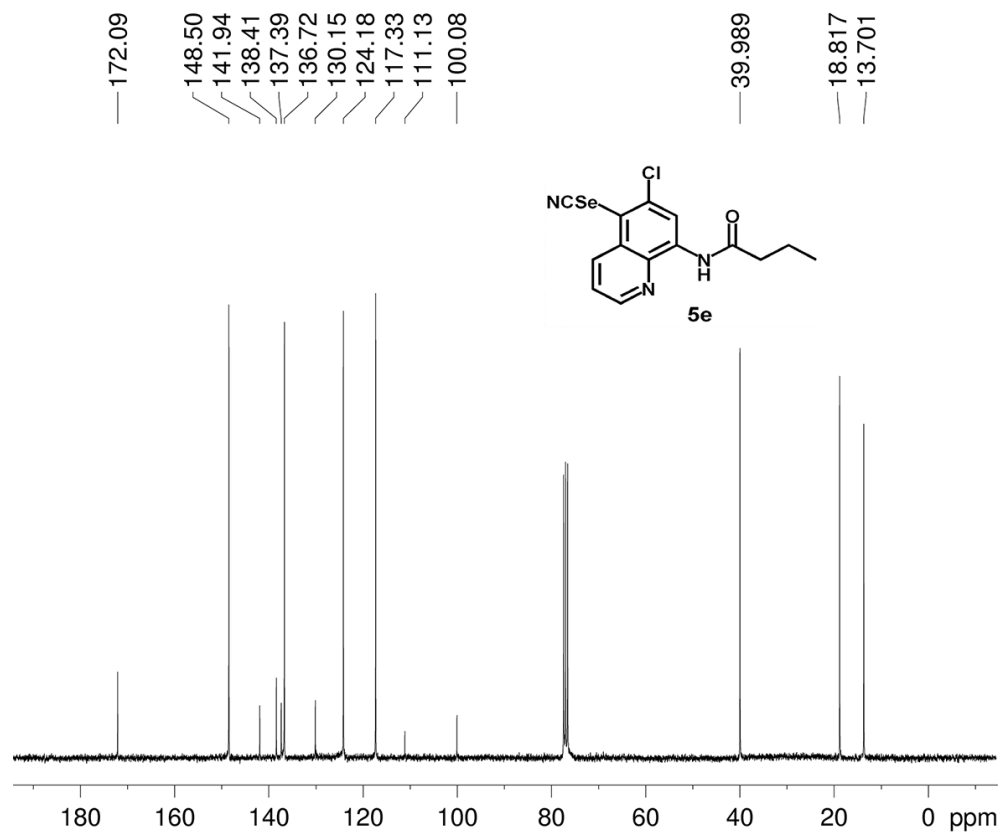

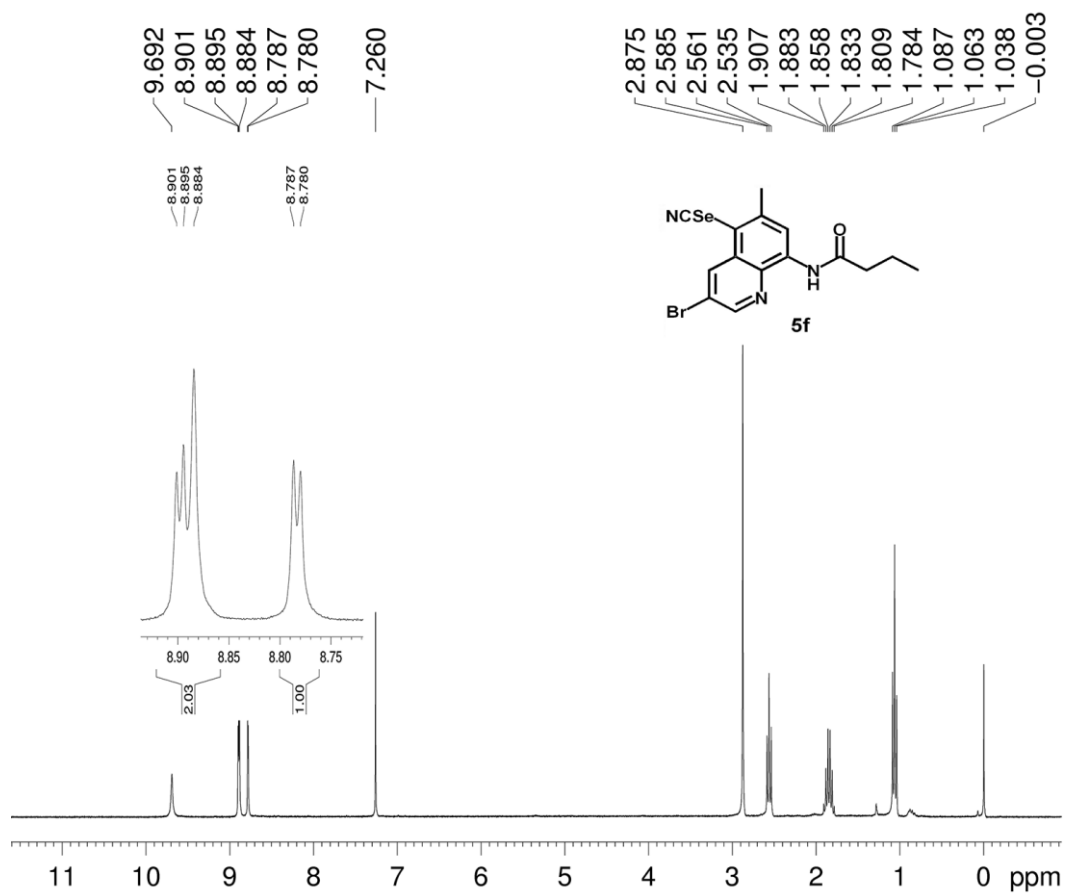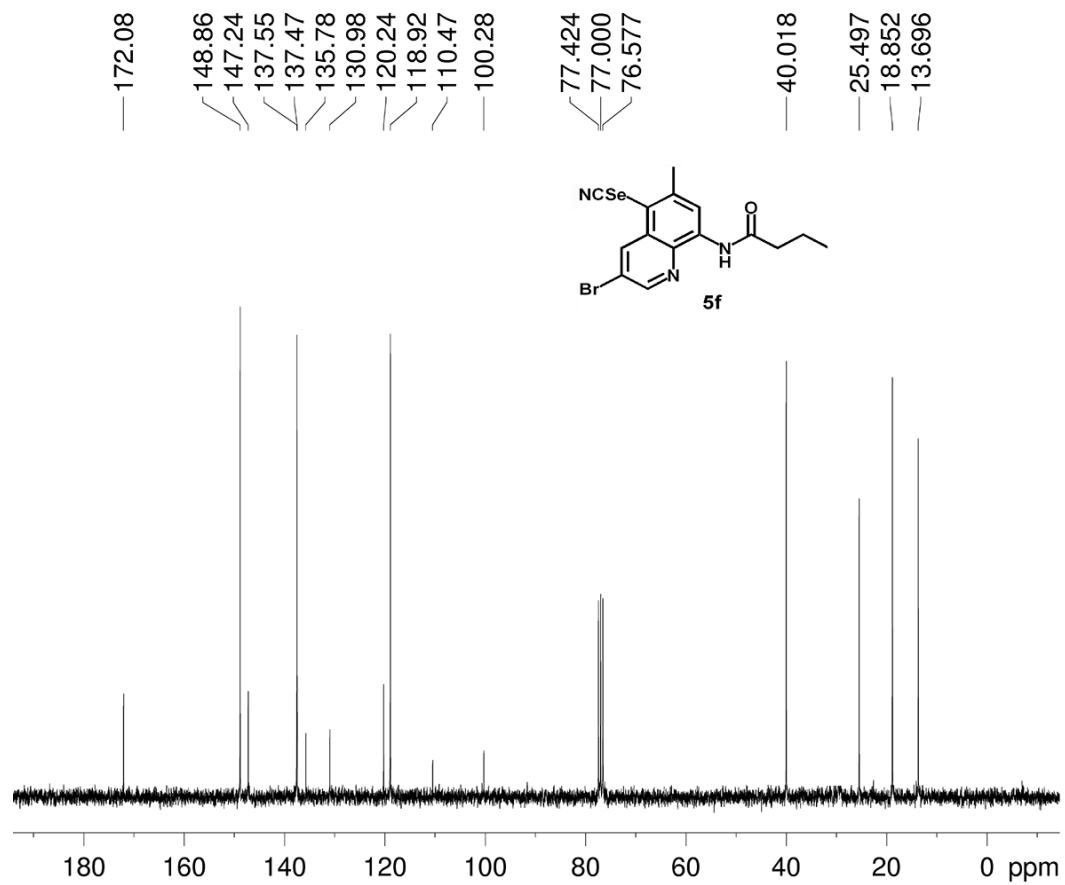

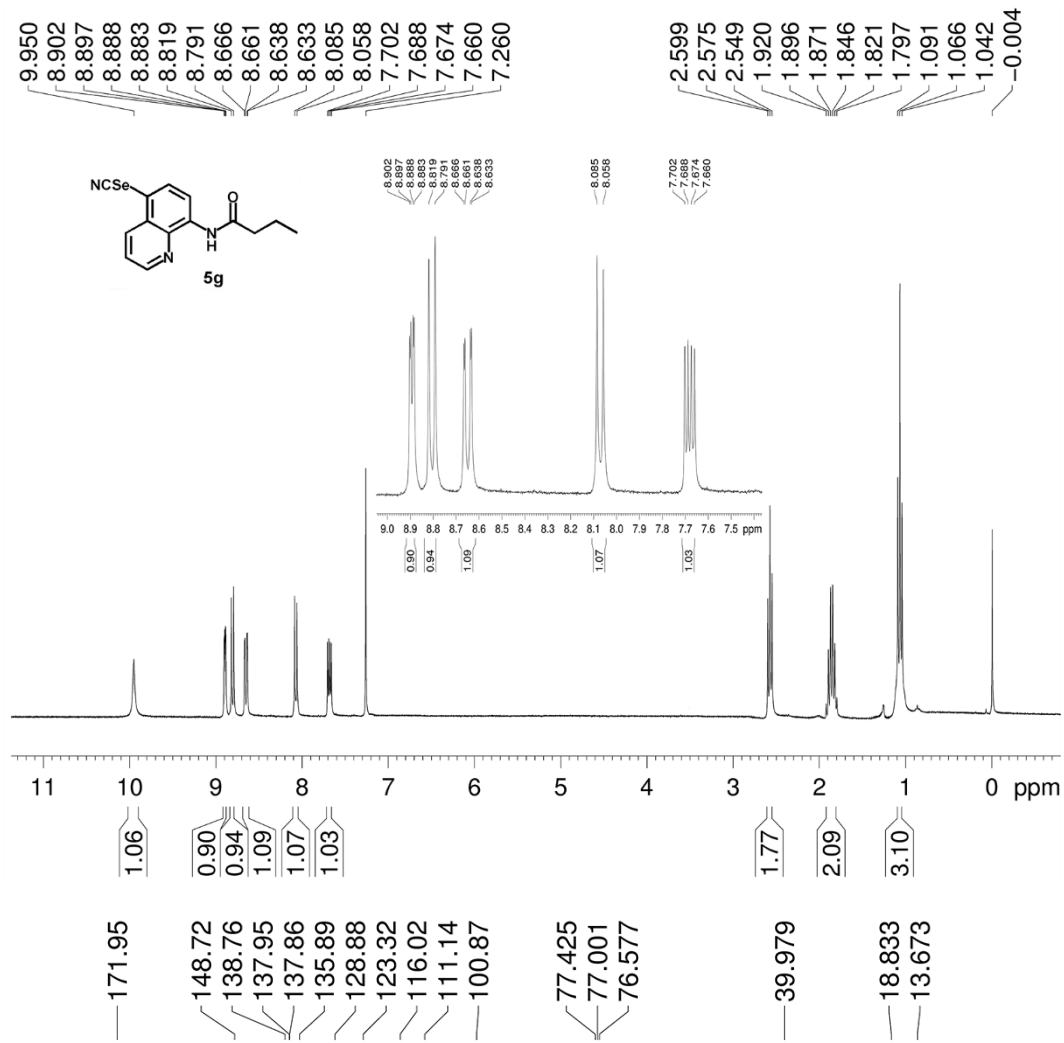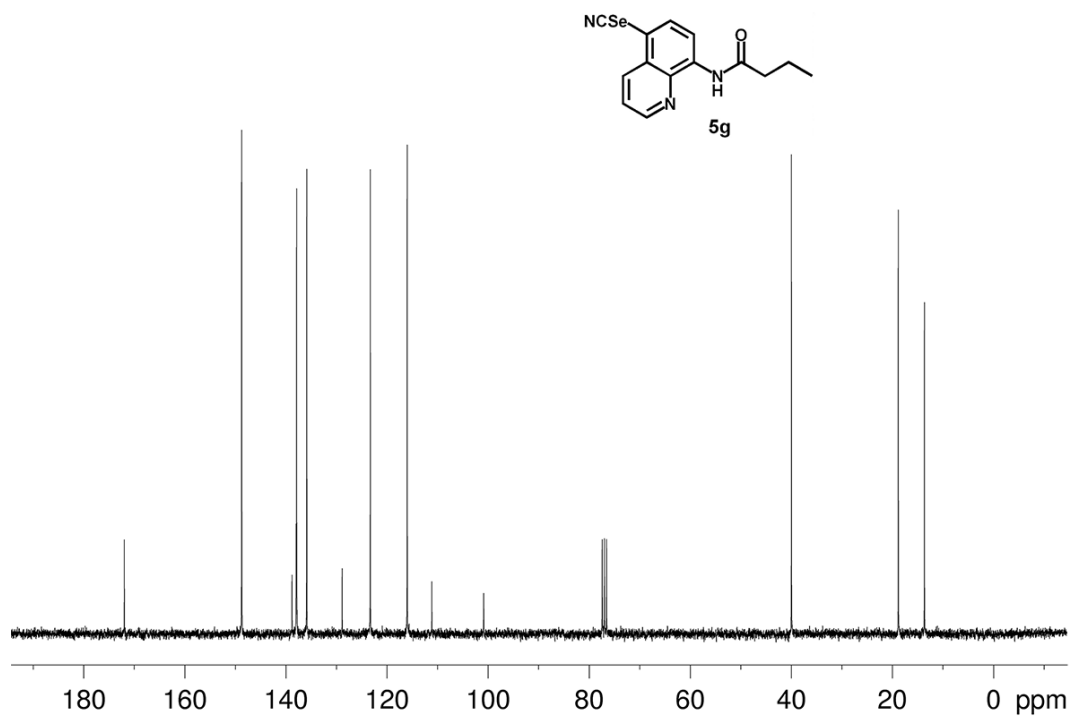



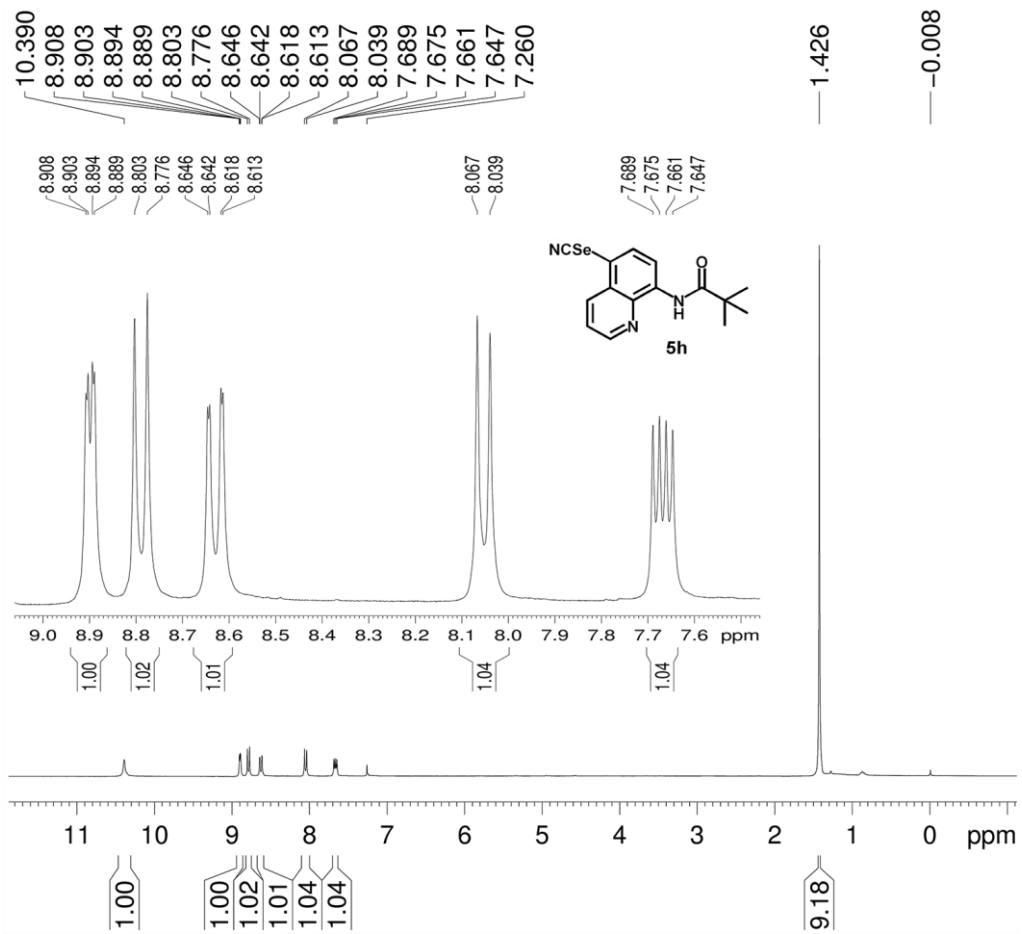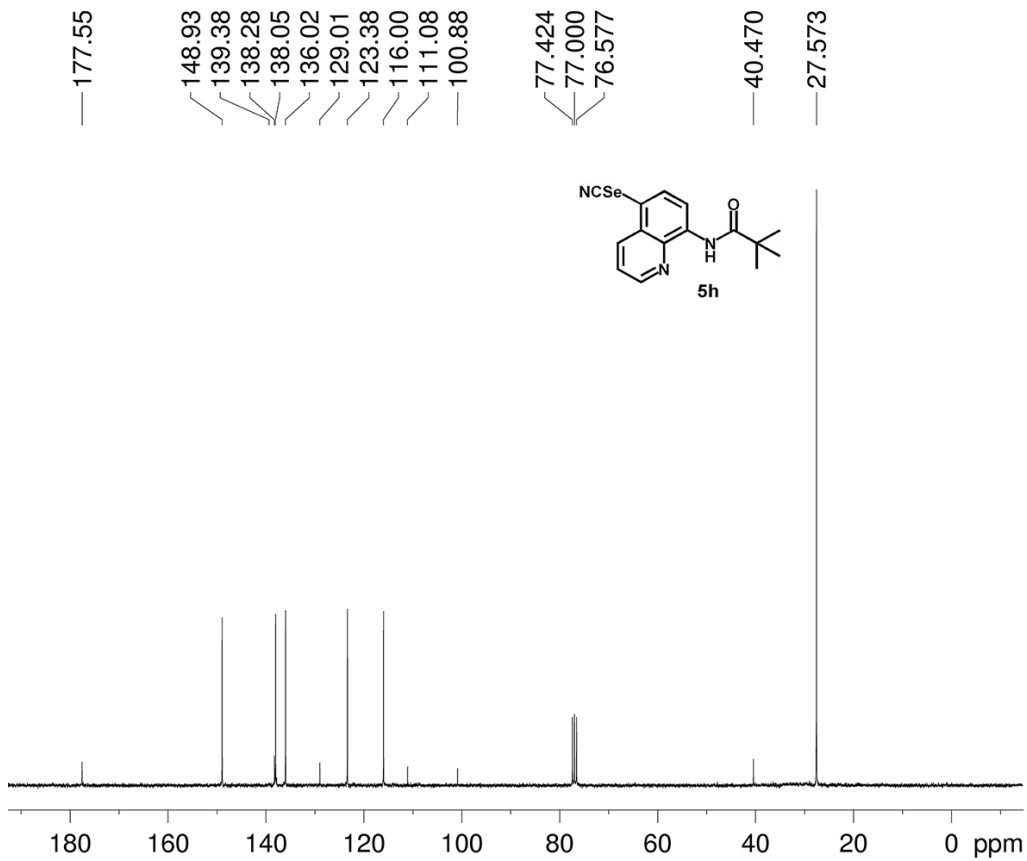

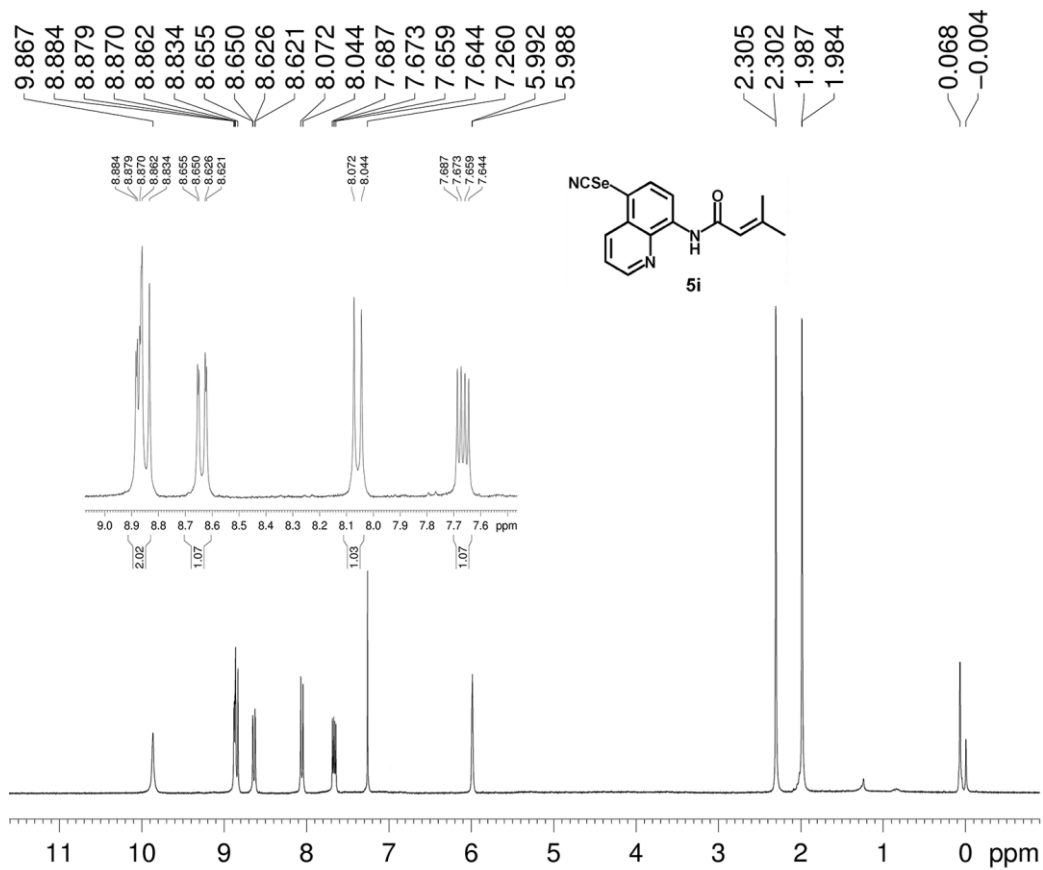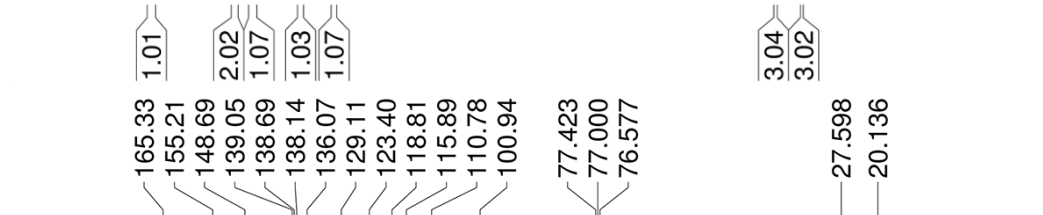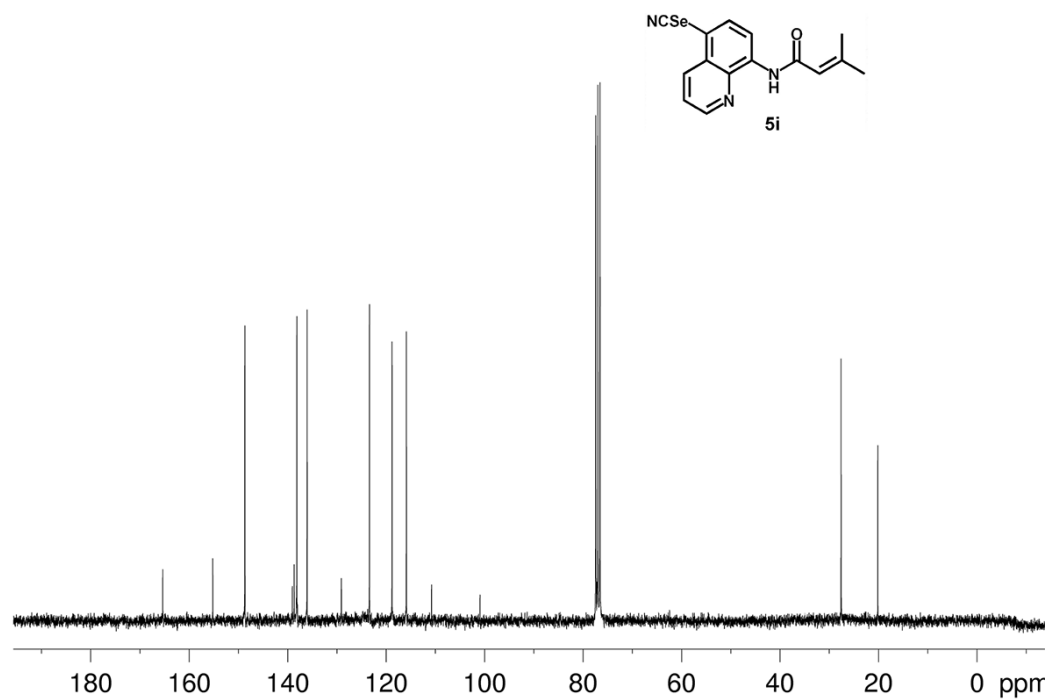

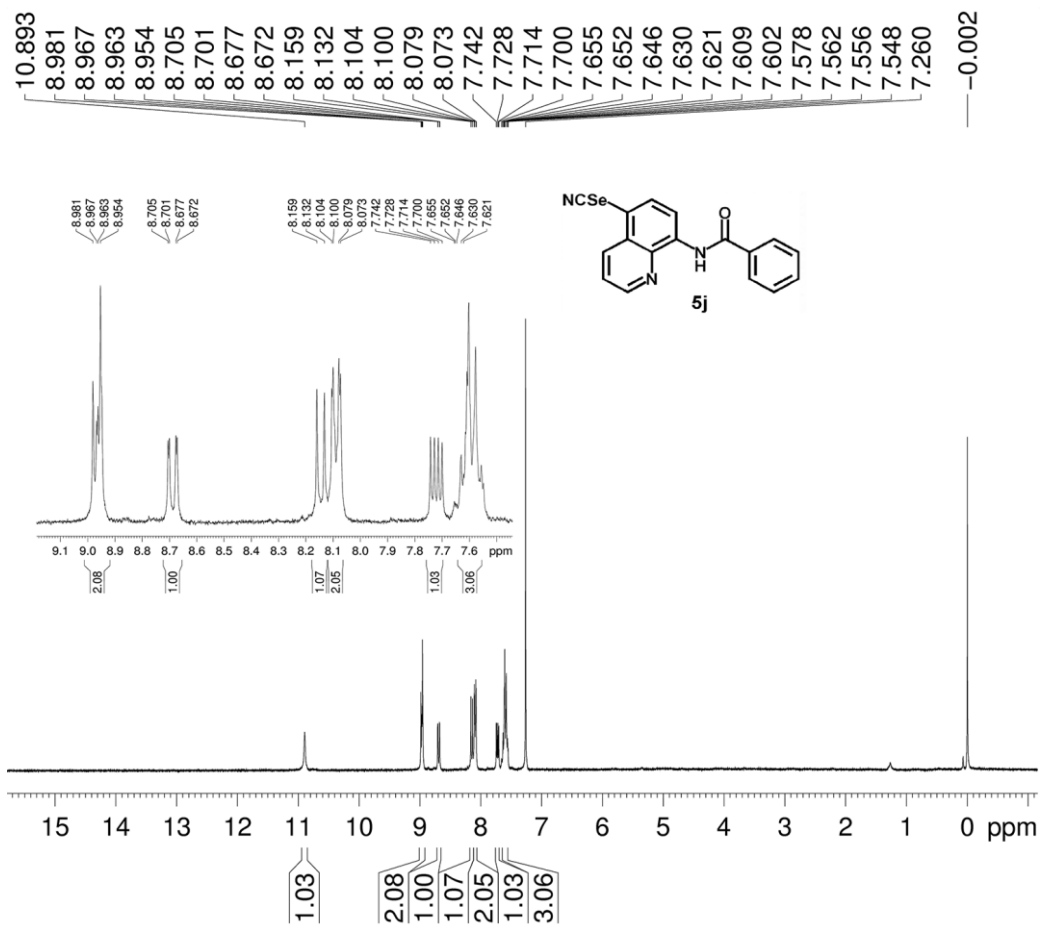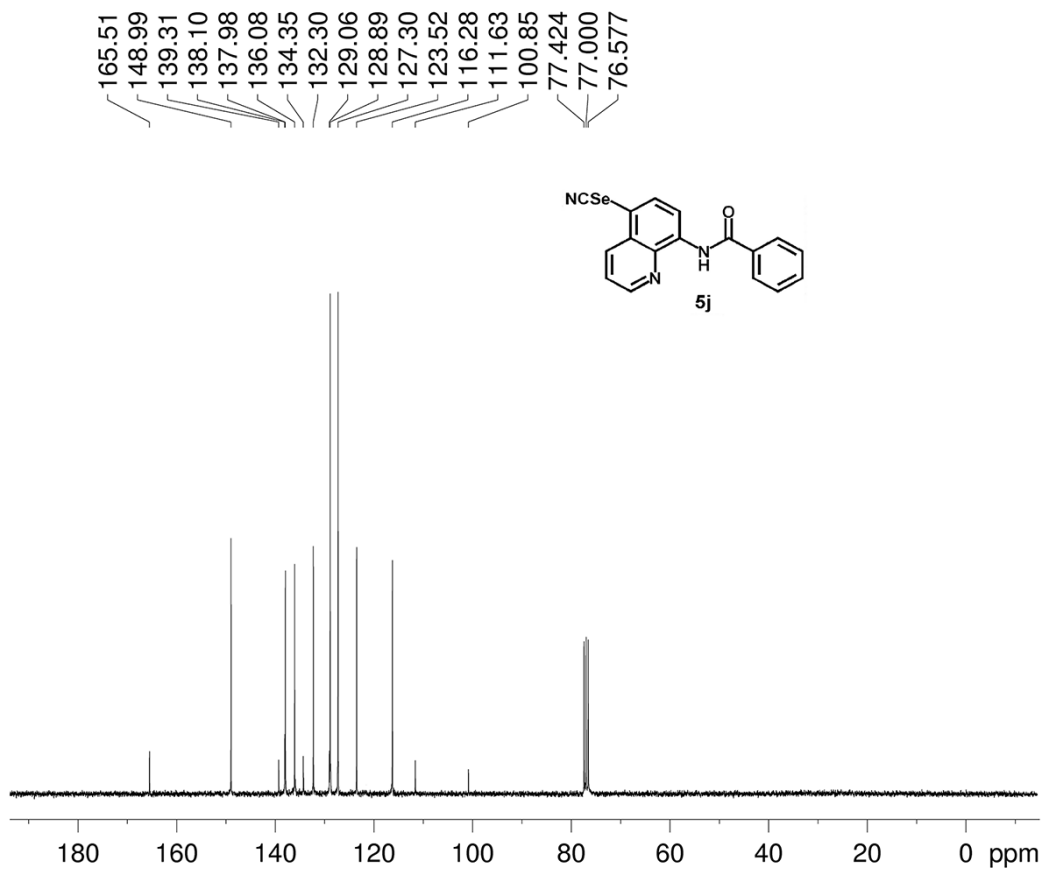

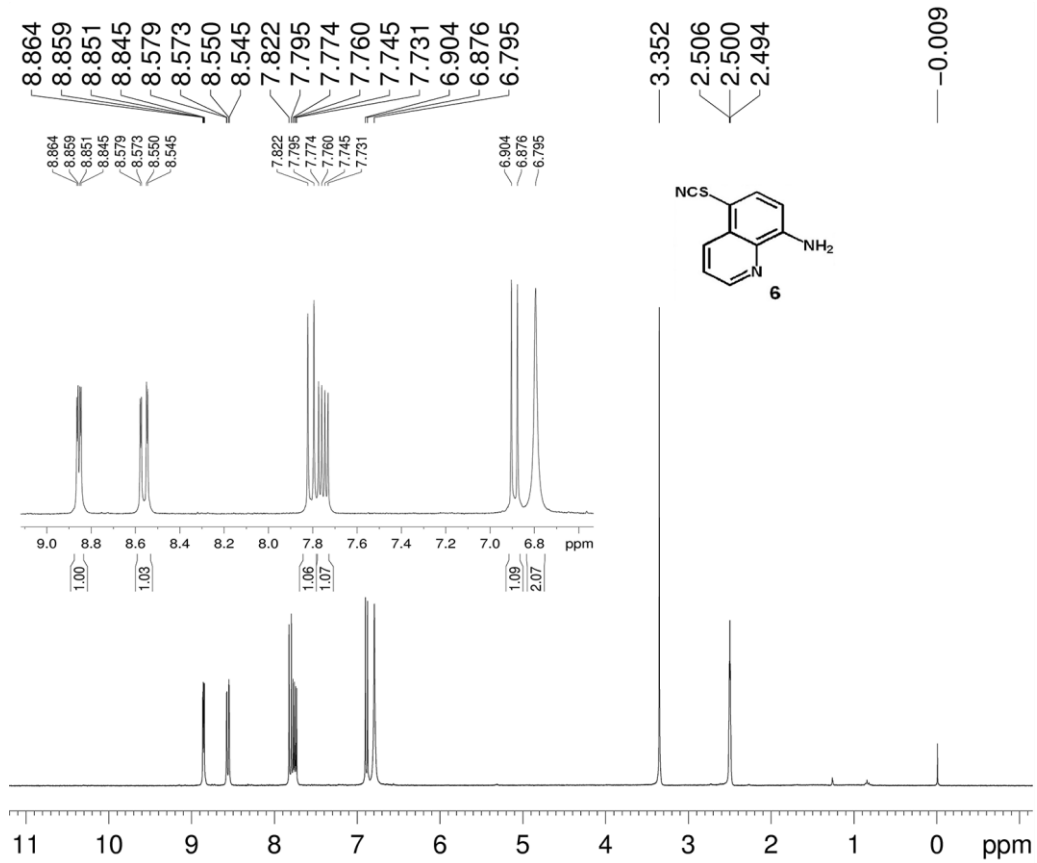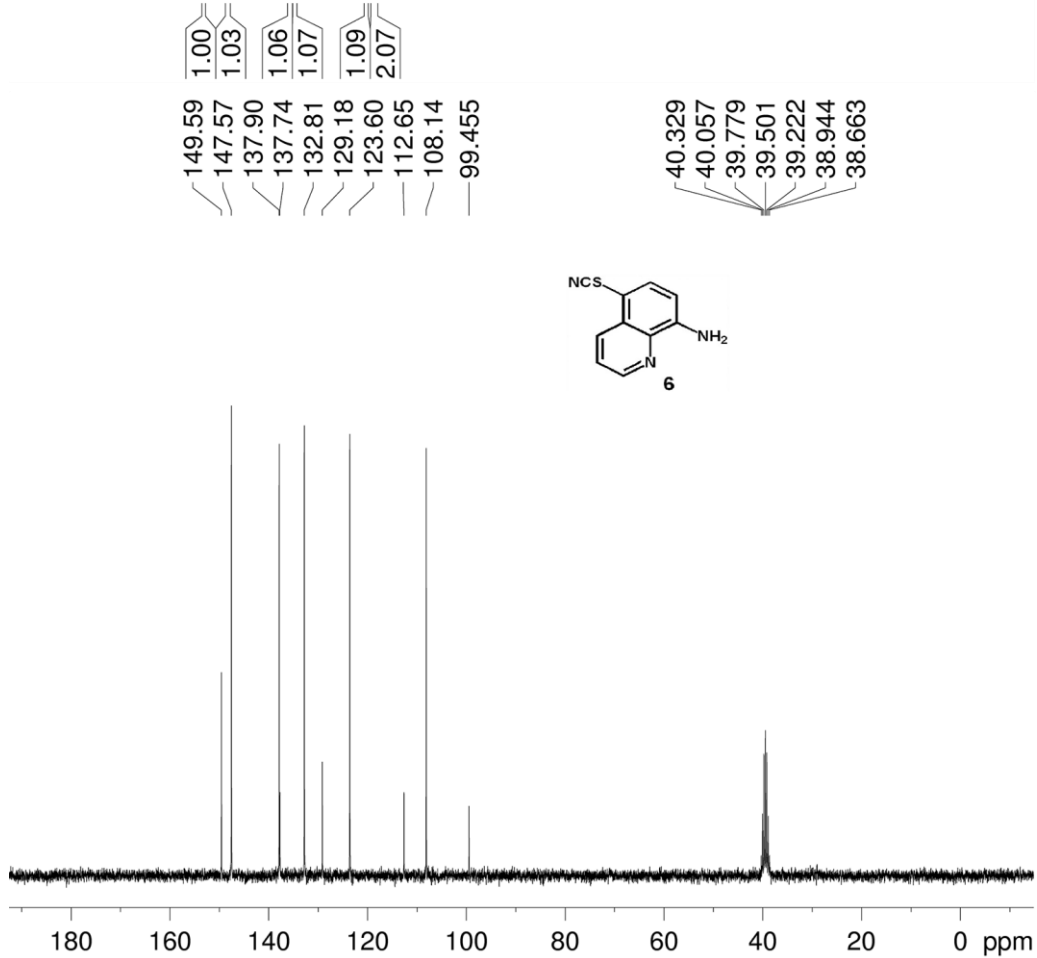

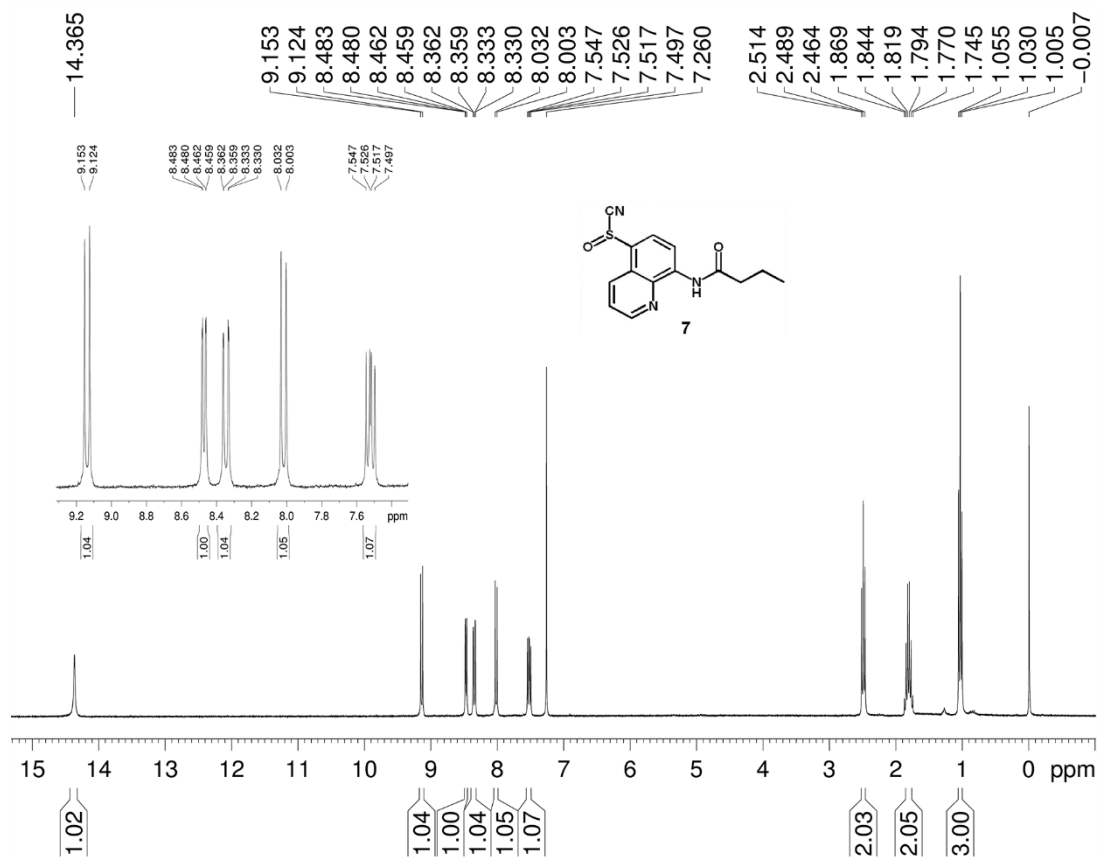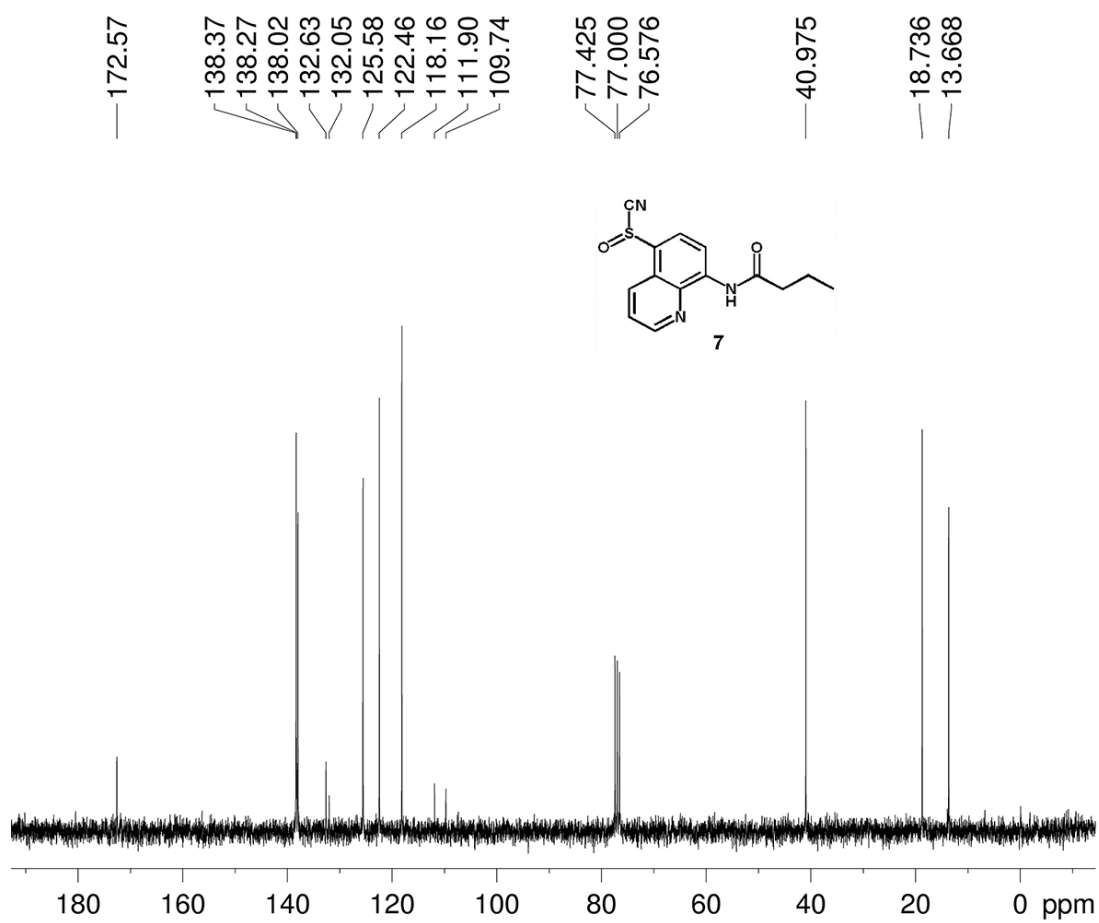

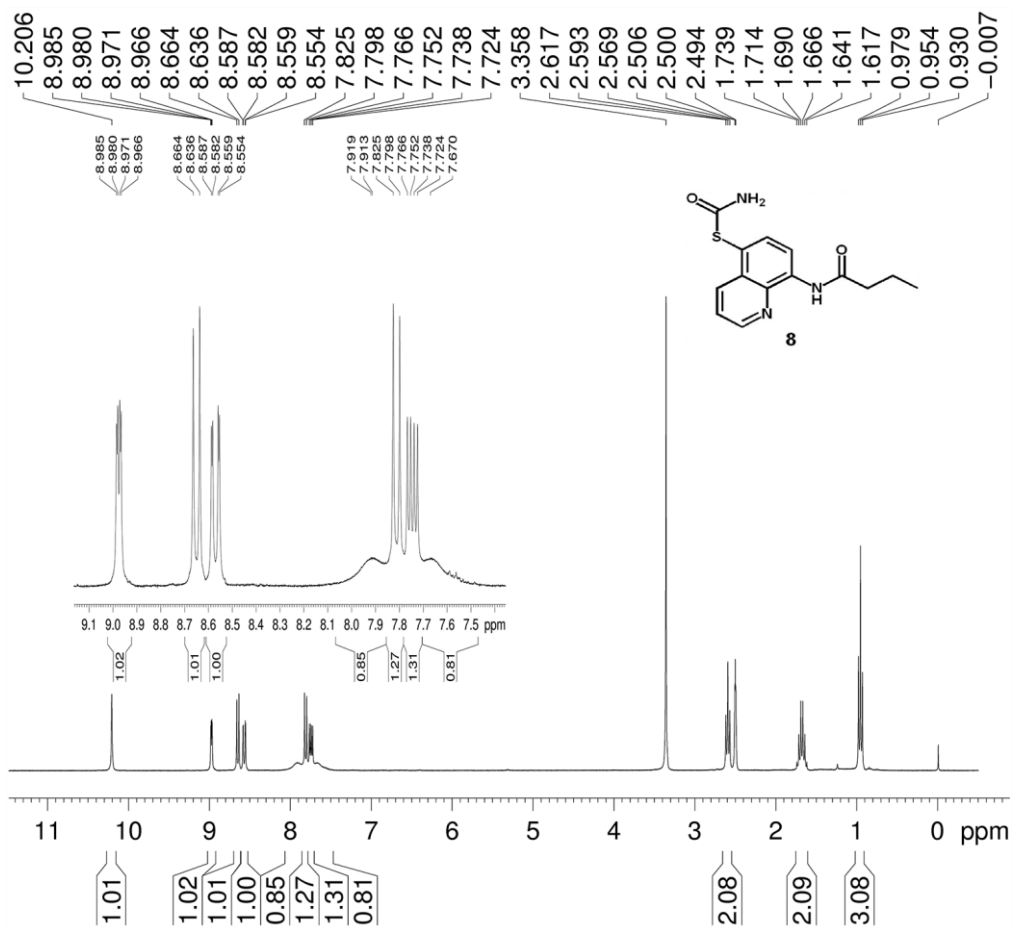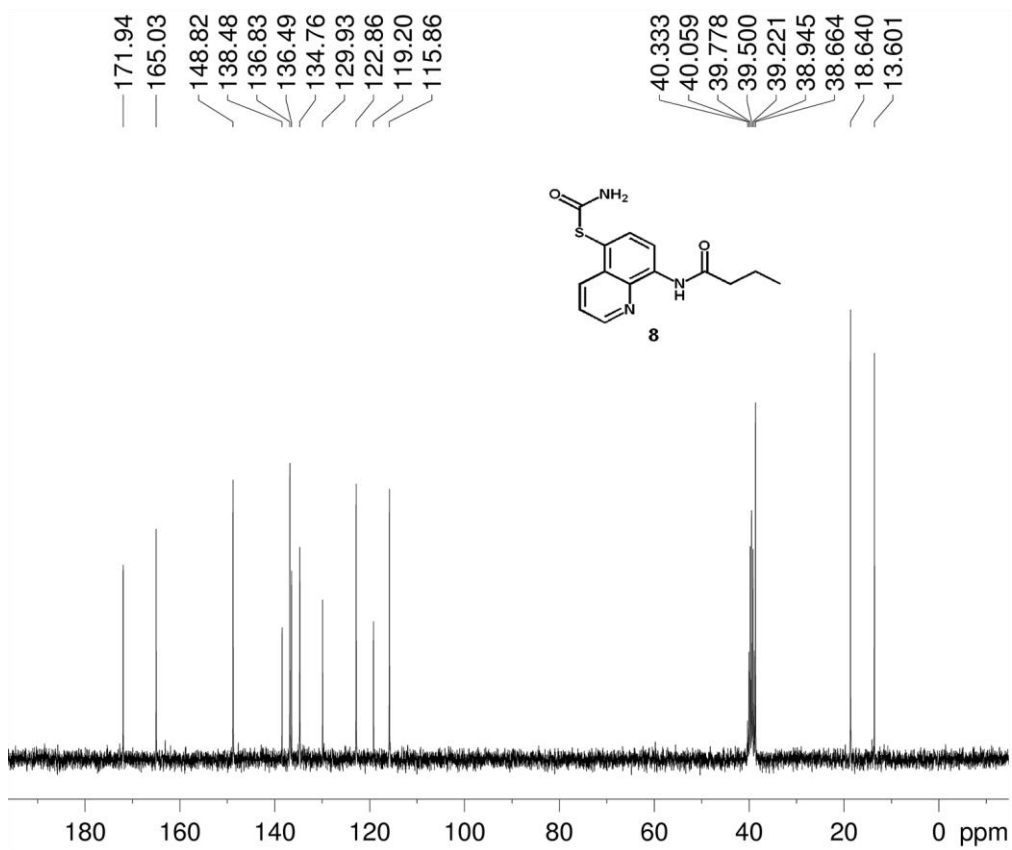

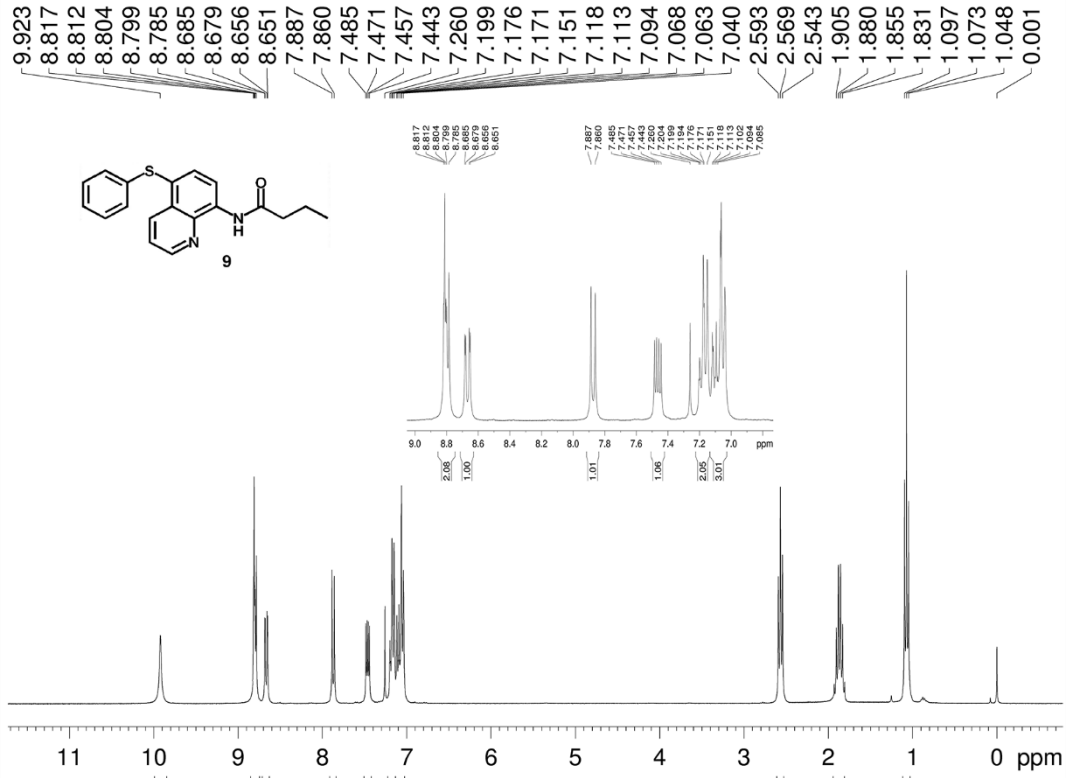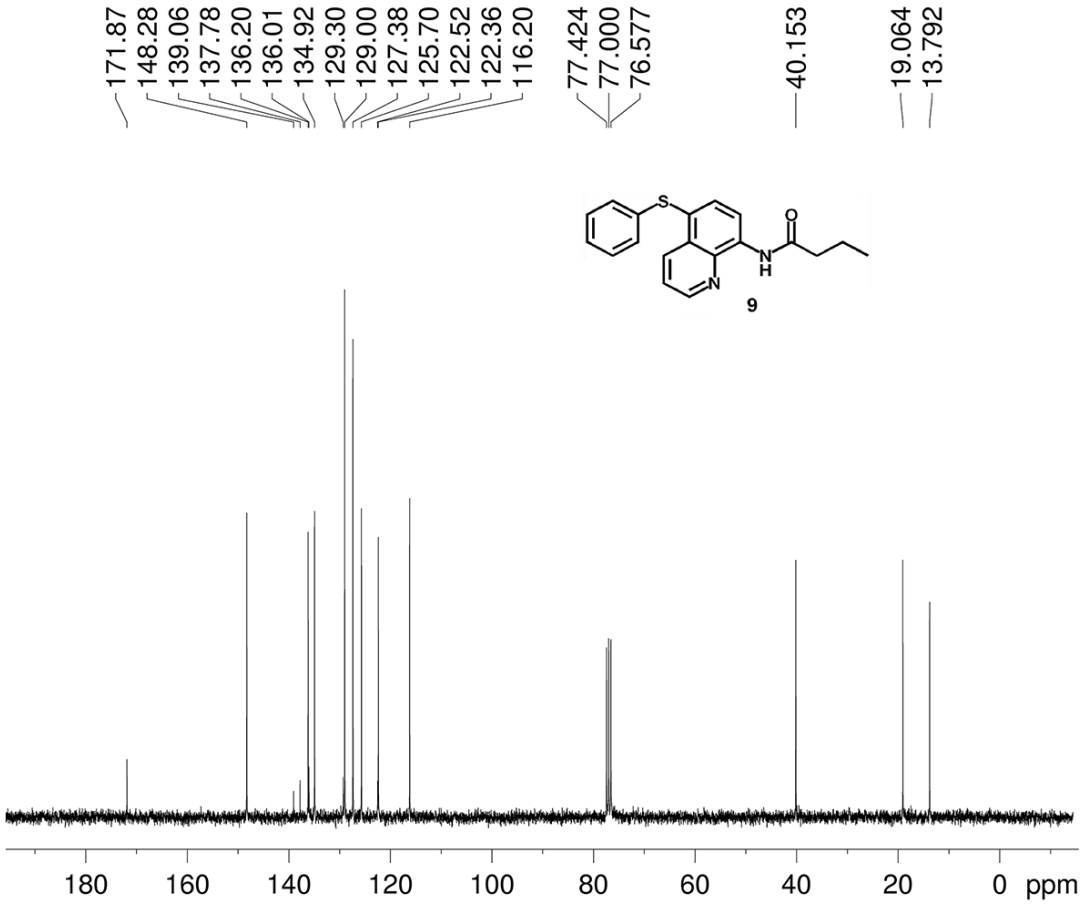

Supplement: c6qo00590j1.pdf [file c6qo00590j1.pdf]
